# Supplementary material for: Design of transition metal complexes containing a P–E radical motif
Source: Royal Society of Chemistry journal article supplement (doi:10.1039/d2dt04149a), 2023-01-01
Supplement: d2dt04149a1.pdf [file d2dt04149a1.pdf]

## Design of Transition Metal Complexes containing a P-E radical motif

Hui Zhu,<sup>[a,b]</sup> Zheng-Wang Qu,<sup>\*[b]</sup> Stefan Grimme,<sup>[b]</sup> Philipp C. Brehm,<sup>[a]</sup> Rainer Streubel<sup>\*[a]</sup>

- 
- [a] Dr. H. Zhu, P. C. Brehm, Prof. R. Streubel  
Institut für Anorganische Chemie, University of Bonn,  
Gerhard-Domagk Straße 1, D-53121 Bonn, Germany.  
E-mail: [r.streubel@uni-bonn.de](mailto:r.streubel@uni-bonn.de),  
Homepage: <https://www.chemie.uni-bonn.de/akstreubel/>
- [b] Dr. H. Zhu, Dr. Z.-W. Qu, Prof. S. Grimme  
Mulliken Center for Theoretical Chemistry, University of Bonn  
Berlingstr. 4, 53115 Bonn, Germany  
E-mail: [qu@thch.uni-bonn.de](mailto:qu@thch.uni-bonn.de)

### Supporting Information

|                                                                           |    |
|---------------------------------------------------------------------------|----|
| <b>Table S1.</b> DFT computed energies in THF solution.....               | S2 |
| <b>Table S2.</b> DFT optimized Cartesian coordinates in THF solution..... | S8 |

**Table S1.** TPSS-D3/def2-TZVP + COSMO computed imaginary frequency (ImF), zero-point energies (ZPE), gas-phase enthalpic (Hc) and Gibbs free-energy (Gc) corrections; the COSMO-RS computed solvation enthalpic (Hsol) and Gibbs free-energy (Gsol) corrections in THF solution; TPSS-D3/def2-QZVP and PW6B95-D3/def2-QZVP single-point energies (TPSS-D3 and PW6B95-D3); the total PW6B95-D3 free energies  $G_P$ ; the relative electronic energies ( $\Delta E_T$  and  $\Delta E_P$ ) and Gibbs free-energies ( $\Delta G_T$  and  $\Delta G_P$ ) at the TPSS-D3 and PW6B95-D3 levels.

| Reactions                                                                                                                                                                                         | Im               | ZPE      | Hc       | Gc       | Hsol     | Gsol     | TPSS-D3     | PW6B95-D3   | $G_P$       | $\Delta E_T$ | $\Delta E_P$ | $\Delta G_P$ | $\Delta G_T$ |
|---------------------------------------------------------------------------------------------------------------------------------------------------------------------------------------------------|------------------|----------|----------|----------|----------|----------|-------------|-------------|-------------|--------------|--------------|--------------|--------------|
| in THF solution                                                                                                                                                                                   | cm <sup>-1</sup> | kcal/mol | kcal/mol | kcal/mol | kcal/mol | kcal/mol | $E_h$       | $E_h$       | $E_h$       | kcal/mol     | kcal/mol     | kcal/mol     | kcal/mol     |
| <i>Oxidation potentials increase in the order: <math>TO^- &lt; Ph_3C^+ &lt; TO^+ &lt; Ar_3N^{*+} &lt; NO^+</math> in THF solution</i> (T = TEMP, Ar = <i>p</i> -C <sub>6</sub> H <sub>4</sub> Br) |                  |          |          |          |          |          |             |             |             |              |              |              |              |
| $TO^-$                                                                                                                                                                                            | 0                | 160.512  | 168.399  | 138.591  | -59.320  | -54.280  | -484.05326  | -484.55442  | -484.41705  | 0.00         | 0.00         | 0.00         | 0.00         |
| $TO^{\bullet}$                                                                                                                                                                                    | 0                | 162.359  | 170.357  | 140.227  | -11.745  | -8.190   | -484.04614  | -484.54639  | -484.33296  | 4.47         | 5.04         | 52.76        | 52.20        |
| $Ph_3C^{\bullet}$                                                                                                                                                                                 | 0                | 173.175  | 182.680  | 148.778  | -19.946  | -14.265  | -733.52607  | -734.33363  | -734.11626  | 0.00         | 0.00         | 0.00         | 0.00         |
| $Ph_3C^+$                                                                                                                                                                                         | 0                | 173.379  | 183.155  | 149.119  | -54.424  | -45.749  | -733.31208  | -734.11522  | -733.94748  | 134.28       | 137.05       | 105.91       | 103.14       |
| $TO^{\bullet}$                                                                                                                                                                                    | 0                | 162.359  | 170.357  | 140.227  | -11.745  | -8.190   | -484.04614  | -484.54639  | -484.33296  | 0.00         | 0.00         | 0.00         | 0.00         |
| $TO^+$                                                                                                                                                                                            | 0                | 162.717  | 170.852  | 140.436  | -54.773  | -47.381  | -483.80092  | -484.29361  | -484.14231  | 153.88       | 158.62       | 119.64       | 114.90       |
| $Ar_3N$                                                                                                                                                                                           | 0                | 152.720  | 165.632  | 123.288  | -28.878  | -20.031  | -8470.75507 | -8475.24141 | -8475.07385 | 0.00         | 0.00         | 0.00         | 0.00         |
| $Ar_3N^{*+}$                                                                                                                                                                                      | 0                | 154.621  | 167.045  | 125.901  | -68.658  | -53.100  | -8470.51268 | -8474.98883 | -8474.86980 | 152.10       | 158.50       | 128.04       | 121.64       |
| $NO^{\bullet}$                                                                                                                                                                                    | 0                | 2.719    | 4.793    | -9.417   | -1.411   | 0.521    | -129.97359  | -130.09903  | -130.11019  | 0.00         | 0.00         | 0.00         | 0.00         |
| $NO^+$                                                                                                                                                                                            | 0                | 3.448    | 5.521    | -8.590   | -90.282  | -77.401  | -129.62405  | -129.74954  | -129.88356  | 219.34       | 219.31       | 142.21       | 142.25       |
| <i><math>Fe(CO)_4PPh_2O^{\bullet}</math> (<math>1a^{\bullet}</math>) radical complex formation and P-to-O 1,2-Fe-shift</i> (T = TEMP)                                                             |                  |          |          |          |          |          |             |             |             |              |              |              |              |
| $1aT$                                                                                                                                                                                             | 0                | 297.612  | 319.903  | 260.484  | -25.777  | -18.800  | -3006.69024 | -3009.00205 | -3008.61389 | -20.65       | -18.31       | 0.37         | -1.96        |
| $1a^{\bullet} + T^{\bullet}$                                                                                                                                                                      | 0                | 296.173  | 318.388  | 243.798  | -32.205  | -22.691  | -3006.65733 | -3008.97287 | -3008.61449 | 0.00         | 0.00         | 0.00         | 0.00         |
| $1a^{\bullet}$                                                                                                                                                                                    | 0                | 136.532  | 151.486  | 105.485  | -21.478  | -15.385  | -2597.87546 | -2599.76296 | -2599.61636 | 0.00         | 0.00         | 0.00         | 0.00         |
| $1ae_{ts}$                                                                                                                                                                                        | 0                | 136.119  | 151.125  | 104.942  | -20.955  | -14.759  | -2597.84441 | -2599.73531 | -2599.58858 | 19.49        | 17.35        | 17.43        | 19.57        |
| $1ae^{\bullet}$                                                                                                                                                                                   | 0                | 136.357  | 151.173  | 105.646  | -20.385  | -14.407  | -2597.84439 | -2599.73788 | -2599.58947 | 19.50        | 15.74        | 16.88        | 20.63        |
| $1a^-$                                                                                                                                                                                            | 0                | 136.244  | 151.049  | 105.181  | -58.379  | -51.549  | -2597.98965 | -2599.86677 | -2599.77829 | -71.66       | -65.14       | -101.61      | -108.13      |
| <i><math>Fe(CO)_4PPh_2S^{\bullet}</math> (<math>1b^{\bullet}</math>) radical complex formation and P-to-S 1,2-Fe-shift</i>                                                                        |                  |          |          |          |          |          |             |             |             |              |              |              |              |
| $1bT$                                                                                                                                                                                             | 0                | 296.174  | 318.874  | 258.645  | -27.013  | -19.668  | -3329.70390 | -3332.23852 | -3331.85467 | -41.73       | -38.31       | -20.70       | -24.12       |
| $1b^{\bullet} + T^{\bullet}$                                                                                                                                                                      | 0                | 295.059  | 317.597  | 242.193  | -32.670  | -22.718  | -3329.63739 | -3332.17746 | -3331.82169 | 0.00         | 0.00         | 0.00         | 0.00         |
| $1b^{\bullet}$                                                                                                                                                                                    | 0                | 135.418  | 150.695  | 103.880  | -21.943  | -15.412  | -2920.85552 | -2922.96756 | -2922.82356 | 0.00         | 0.00         | 0.00         | 0.00         |

|                                                                                                                                                |     |         |         |         |         |         |             |             |             |        |        |        |         |
|------------------------------------------------------------------------------------------------------------------------------------------------|-----|---------|---------|---------|---------|---------|-------------|-------------|-------------|--------|--------|--------|---------|
| <b>1be_ts</b>                                                                                                                                  | 0   | 135.167 | 150.471 | 103.644 | -21.287 | -14.895 | -2920.83815 | -2922.95451 | -2922.81006 | 10.90  | 8.19   | 8.47   | 11.18   |
| <b>1be<sup>•</sup></b>                                                                                                                         | 0   | 135.563 | 150.701 | 104.395 | -21.191 | -14.911 | -2920.83758 | -2922.95654 | -2922.81093 | 11.26  | 6.91   | 7.93   | 12.27   |
| <b>1b<sup>-</sup></b>                                                                                                                          | 0   | 135.190 | 150.265 | 103.880 | -58.709 | -51.401 | -2920.96327 | -2923.06767 | -2922.98103 | -67.62 | -62.82 | -98.81 | -103.60 |
| <i>Fe(CO)<sub>4</sub>PPh<sub>2</sub>NMe<sup>•</sup> (1c<sup>•</sup>) radical complex formation and P-to-N 1,2-Fe-shift</i>                     |     |         |         |         |         |         |             |             |             |        |        |        |         |
| <b>1cT</b>                                                                                                                                     | 0   | 323.403 | 346.362 | 285.969 | -26.959 | -19.806 | -3026.14163 | -3028.47683 | -3028.04967 | -40.97 | -46.73 | -26.79 | -21.03  |
| <b>1c<sup>•</sup> + T<sup>•</sup></b>                                                                                                          | 0   | 320.328 | 343.723 | 266.847 | -32.143 | -22.514 | -3026.07634 | -3028.40237 | -3028.00698 | 0.00   | 0.00   | 0.00   | 0.00    |
| <b>1c<sup>•</sup></b>                                                                                                                          | 0   | 160.687 | 176.821 | 128.534 | -21.416 | -15.208 | -2617.29446 | -2619.19246 | -2619.00885 | 0.00   | 0.00   | 0.00   | 0.00    |
| <b>1ce_ts</b>                                                                                                                                  | 0   | 160.708 | 176.799 | 128.616 | -20.331 | -14.309 | -2617.27675 | -2619.18777 | -2619.00260 | 11.11  | 2.94   | 3.92   | 12.10   |
| <b>1ce<sup>•</sup></b>                                                                                                                         | 0   | 160.827 | 176.870 | 128.798 | -20.276 | -14.275 | -2617.27704 | -2619.18863 | -2619.00312 | 10.93  | 2.40   | 3.60   | 12.13   |
| <b>1c<sup>-</sup></b>                                                                                                                          | 0   | 160.162 | 176.206 | 128.019 | -57.235 | -50.211 | -2617.39701 | -2619.29405 | -2619.16704 | -64.35 | -63.75 | -99.26 | -99.87  |
| <i>Fe(CO)<sub>4</sub>PPh<sub>2</sub>PMe<sup>•</sup> (1d<sup>•</sup>) radical complex formation and P-to-P 1,2-Fe-shift</i>                     |     |         |         |         |         |         |             |             |             |        |        |        |         |
| <b>1dT</b>                                                                                                                                     | 0   | 319.877 | 343.726 | 281.467 | -28.063 | -20.636 | -3312.81305 | -3315.35777 | -3314.93910 | -60.94 | -64.19 | -46.05 | -42.79  |
| <b>1d<sup>•</sup> + T<sup>•</sup></b>                                                                                                          | 0   | 318.148 | 342.056 | 264.056 | -33.318 | -23.260 | -3312.71594 | -3315.25547 | -3314.86572 | 0.00   | 0.00   | 0.00   | 0.00    |
| <b>1d<sup>•</sup></b>                                                                                                                          | 0   | 158.507 | 175.154 | 125.743 | -22.591 | -15.954 | -2903.93407 | -2906.04557 | -2905.86760 | 0.00   | 0.00   | 0.00   | 0.00    |
| <b>1de_ts</b>                                                                                                                                  | 0   | 158.965 | 175.351 | 126.579 | -22.091 | -15.525 | -2903.91962 | -2906.04022 | -2905.86023 | 9.07   | 3.35   | 4.62   | 10.33   |
| <b>1de<sup>•</sup></b>                                                                                                                         | 0   | 158.689 | 175.174 | 126.213 | -21.229 | -14.965 | -2903.93097 | -2906.04771 | -2905.86742 | 1.94   | -1.35  | 0.11   | 3.40    |
| <b>1d<sup>-</sup></b>                                                                                                                          | 0   | 157.922 | 174.449 | 125.317 | -58.331 | -50.826 | -2904.02097 | -2906.13099 | -2906.00927 | -54.53 | -53.60 | -88.90 | -89.83  |
| <i>Fe(CO)<sub>4</sub>P(NMeCH<sub>2</sub>CH<sub>2</sub>NMe)O<sup>•</sup> (2a<sup>•</sup>) radical complex formation and P-to-O 1,2-Fe-shift</i> |     |         |         |         |         |         |             |             |             |        |        |        |         |
| <b>2aT</b>                                                                                                                                     | 0   | 275.605 | 296.108 | 240.102 | -21.005 | -15.301 | -2811.22510 | -2813.30017 | -2812.93892 | -22.33 | -18.73 | -0.25  | -3.84   |
| <b>2a<sup>•</sup> + T<sup>•</sup></b>                                                                                                          | 0   | 273.993 | 294.478 | 223.605 | -27.205 | -19.179 | -2811.18952 | -2813.27032 | -2812.93853 | 0.00   | 0.00   | 0.00   | 0.00    |
| <b>2a<sup>•</sup></b>                                                                                                                          | 0   | 114.352 | 127.576 | 85.292  | -16.478 | -11.873 | -2402.40765 | -2404.06041 | -2403.94040 | 0.00   | 0.00   | 0.00   | 0.00    |
| <b>2ae_ts</b>                                                                                                                                  | 70i | 114.771 | 127.218 | 86.552  | -17.736 | -12.699 | -2402.38058 | -2404.03067 | -2403.90997 | 16.99  | 18.66  | 19.10  | 17.42   |
| <b>2ae<sup>•</sup></b>                                                                                                                         | 0   | 113.984 | 126.928 | 85.445  | -15.292 | -10.600 | -2402.38271 | -2404.03770 | -2403.91542 | 15.65  | 14.25  | 15.68  | 17.07   |
| <b>2aec<sup>•</sup> (CO in ring)</b>                                                                                                           | 0   | 114.739 | 127.719 | 85.786  | -18.844 | -13.642 | -2402.38171 | -2404.03771 | -2403.91973 | 16.28  | 14.25  | 12.97  | 15.00   |
| <b>2a<sup>-</sup></b>                                                                                                                          | 0   | 113.872 | 126.884 | 84.928  | -54.202 | -48.836 | -2402.51540 | -2404.15938 | -2404.09885 | -67.62 | -62.10 | -99.43 | -104.94 |
| <i>Fe(CO)<sub>4</sub>P(NMeCH<sub>2</sub>CH<sub>2</sub>NMe)S<sup>•</sup> (2b<sup>•</sup>) radical complex formation and P-to-S 1,2-Fe-shift</i> |     |         |         |         |         |         |             |             |             |        |        |        |         |
| <b>2bT</b>                                                                                                                                     | 0   | 273.986 | 295.012 | 237.824 | -22.312 | -16.319 | -3134.23031 | -3136.52964 | -3136.17364 | -47.46 | -42.97 | -25.39 | -29.88  |
| <b>2b<sup>•</sup> + T<sup>•</sup></b>                                                                                                          | 0   | 272.641 | 293.490 | 221.708 | -28.312 | -19.675 | -3134.15468 | -3136.46116 | -3136.13318 | 0.00   | 0.00   | 0.00   | 0.00    |
| <b>2b<sup>•</sup></b>                                                                                                                          | 0   | 113.000 | 126.588 | 83.395  | -17.585 | -12.369 | -2725.37280 | -2727.25125 | -2727.13505 | 0.00   | 0.00   | 0.00   | 0.00    |

|                                                                                                                                                  |      |         |         |         |         |         |             |             |             |        |        |                |         |
|--------------------------------------------------------------------------------------------------------------------------------------------------|------|---------|---------|---------|---------|---------|-------------|-------------|-------------|--------|--------|----------------|---------|
| <b>2be_ts</b>                                                                                                                                    | 0    | 113.032 | 126.523 | 83.564  | -16.323 | -11.266 | -2725.35601 | -2727.23465 | -2727.11643 | 10.54  | 10.42  | <i>11.69</i>   | 11.81   |
| <b>2be<sup>•</sup></b>                                                                                                                           | 0    | 112.612 | 126.116 | 83.187  | -16.330 | -11.233 | -2725.36812 | -2727.24718 | -2727.12950 | 2.94   | 2.56   | <i>3.48</i>    | 3.87    |
| <b>2b<sup>-</sup></b>                                                                                                                            | 0    | 112.747 | 126.061 | 83.425  | -54.872 | -48.914 | -2725.48327 | -2727.35374 | -2727.29573 | -69.32 | -64.31 | <i>-100.83</i> | -105.84 |
| <i>Fe(CO)<sub>4</sub>P(NMeCH<sub>2</sub>CH<sub>2</sub>NMe)NMe<sup>•</sup> (2c<sup>•</sup>) radical complex formation and P-to-N 1,2-Fe-shift</i> |      |         |         |         |         |         |             |             |             |        |        |                |         |
| <b>2cT</b>                                                                                                                                       | 0    | 301.088 | 322.512 | 264.857 | -20.885 | -15.194 | -2830.66950 | -2832.76875 | -2832.36787 | -42.85 | -47.83 | <i>-27.38</i>  | -22.40  |
| <b>2c<sup>•</sup> + T<sup>•</sup></b>                                                                                                            | 0    | 297.757 | 319.501 | 246.090 | -26.896 | -18.765 | -2830.60122 | -2832.69253 | -2832.32424 | 0.00   | 0.00   | <i>0.00</i>    | 0.00    |
| <b>2c<sup>•</sup></b>                                                                                                                            | 0    | 138.116 | 152.599 | 107.777 | -16.169 | -11.459 | -2421.81935 | -2423.48263 | -2423.32612 | 0.00   | 0.00   | <i>0.00</i>    | 0.00    |
| <b>2ce_ts</b>                                                                                                                                    | 0    | 138.378 | 152.608 | 108.440 | -14.560 | -10.037 | -2421.77875 | -2423.44042 | -2423.28059 | 25.48  | 26.49  | <i>28.57</i>   | 27.56   |
| <b>2ce<sup>•</sup></b>                                                                                                                           | 0    | 138.503 | 152.430 | 109.138 | -14.710 | -10.093 | -2421.81307 | -2423.48427 | -2423.32342 | 3.94   | -1.03  | <i>1.69</i>    | 6.67    |
| <b>2c<sup>-</sup></b>                                                                                                                            | 0    | 137.783 | 152.061 | 107.687 | -52.716 | -47.142 | -2421.92132 | -2423.58450 | -2423.48500 | -63.99 | -63.92 | <i>-99.70</i>  | -99.76  |
| <i>Fe(CO)<sub>4</sub>P(NMeCH<sub>2</sub>CH<sub>2</sub>NMe)PMe<sup>•</sup> (2d<sup>•</sup>) radical complex formation and P-to-P 1,2-Fe-shift</i> |      |         |         |         |         |         |             |             |             |        |        |                |         |
| <b>2dT</b>                                                                                                                                       | 0    | 297.473 | 319.653 | 260.459 | -22.815 | -16.732 | -3117.33130 | -3119.63879 | -3119.24737 | -60.87 | -63.26 | <i>-47.11</i>  | -44.71  |
| <b>2d<sup>•</sup> + T<sup>•</sup></b>                                                                                                            | 0    | 295.732 | 317.920 | 243.513 | -25.664 | -17.831 | -3117.23430 | -3119.53797 | -3119.17230 | 0.00   | 0.00   | <i>0.00</i>    | 0.00    |
| <b>2d<sup>•</sup></b>                                                                                                                            | 0    | 136.091 | 151.018 | 105.200 | -14.937 | -10.525 | -2708.45243 | -2710.32807 | -2710.17418 | 0.00   | 0.00   | <i>0.00</i>    | 0.00    |
| <b>2de_ts</b>                                                                                                                                    | 0    | 136.234 | 150.969 | 105.767 | -15.666 | -10.762 | -2708.43180 | -2710.30583 | -2710.15142 | 12.94  | 13.95  | <i>14.28</i>   | 13.27   |
| <b>2de<sup>•</sup></b>                                                                                                                           | 0    | 136.118 | 151.001 | 105.325 | -17.061 | -11.814 | -2708.44920 | -2710.32721 | -2710.17518 | 2.03   | 0.54   | <i>-0.63</i>   | 0.86    |
| <b>2d<sup>-</sup></b>                                                                                                                            | 0    | 135.189 | 150.143 | 104.143 | -54.513 | -48.330 | -2708.54140 | -2710.41767 | -2710.32571 | -55.83 | -56.23 | <i>-95.09</i>  | -94.69  |
| <i>W(CO)<sub>5</sub>PPh<sub>2</sub>O<sup>•</sup> (3a<sup>•</sup>) radical complex formation and P-to-O 1,2-W-shift</i>                           |      |         |         |         |         |         |             |             |             |        |        |                |         |
| <b>3aT</b>                                                                                                                                       | 0    | 301.567 | 325.724 | 262.349 | -26.610 | -19.340 | -1923.44404 | -1925.27106 | -1924.88079 | -32.99 | -36.37 | <i>-18.86</i>  | -15.47  |
| <b>3a<sup>•</sup> + T<sup>•</sup></b>                                                                                                            | 0    | 300.710 | 324.589 | 246.412 | -32.553 | -22.809 | -1923.39147 | -1925.21310 | -1924.85074 | 0.00   | 0.00   | <i>0.00</i>    | 0.00    |
| <b>3a<sup>•</sup></b>                                                                                                                            | 0    | 141.069 | 157.687 | 108.099 | -21.826 | -15.503 | -1514.60960 | -1516.00319 | -1515.85262 | 0.00   | 0.00   | <i>0.00</i>    | 0.00    |
| <b>3aa<sup>•</sup></b>                                                                                                                           | 0    | 141.684 | 158.063 | 108.987 | -21.718 | -15.381 | -1514.60795 | -1516.00151 | -1515.84933 | 1.04   | 1.06   | <i>2.07</i>    | 2.05    |
| <b>3a<sup>-</sup></b>                                                                                                                            | 0    | 139.978 | 156.771 | 106.507 | -56.210 | -49.280 | -1514.73566 | -1516.13306 | -1516.03885 | -79.11 | -81.49 | <i>-116.86</i> | -114.48 |
| <b>3ae_ts</b>                                                                                                                                    | 197i | 141.234 | 157.167 | 109.000 | -22.273 | -15.644 | -1514.60536 | -1515.99943 | -1515.84764 | 2.66   | 2.36   | <i>3.12</i>    | 3.42    |
| <b>3ae<sup>•</sup></b>                                                                                                                           | 0    | 141.380 | 157.757 | 108.609 | -22.688 | -15.980 | -1514.60593 | -1515.99739 | -1515.84677 | 2.30   | 3.64   | <i>3.67</i>    | 2.34    |
| <b>3ac<sup>•</sup> (CO in ring)</b>                                                                                                              | 0    | 142.250 | 158.164 | 110.174 | -23.203 | -16.491 | -1514.58646 | -1515.98159 | -1515.82929 | 14.52  | 13.55  | <i>14.64</i>   | 15.60   |
| <i>W(CO)<sub>5</sub>PPh<sub>2</sub>S<sup>•</sup> (3b<sup>•</sup>) radical complex formation and P-to-S 1,2-W-shift</i>                           |      |         |         |         |         |         |             |             |             |        |        |                |         |
| <b>3bT</b>                                                                                                                                       | 0    | 300.131 | 324.765 | 260.379 | -27.079 | -19.703 | -2246.45327 | -2248.50489 | -2248.11834 | -47.55 | -48.98 | <i>-32.95</i>  | -31.52  |
| <b>3b<sup>•</sup> + T<sup>•</sup></b>                                                                                                            | 0    | 300.190 | 324.159 | 245.764 | -33.114 | -23.006 | -2246.37750 | -2248.42683 | -2248.06582 | 0.00   | 0.00   | <i>0.00</i>    | 0.00    |

|                                                                                                                                                                      |       |         |         |         |         |         |             |             |             |        |        |                |         |
|----------------------------------------------------------------------------------------------------------------------------------------------------------------------|-------|---------|---------|---------|---------|---------|-------------|-------------|-------------|--------|--------|----------------|---------|
| <b>3b<sup>•</sup></b>                                                                                                                                                | 0     | 140.549 | 157.257 | 107.451 | -22.387 | -15.700 | -1837.59562 | -1839.21693 | -1839.06770 | 0.00   | 0.00   | <i>0.00</i>    | 0.00    |
| <b>3be_ts</b>                                                                                                                                                        | 225i  | 140.413 | 156.680 | 107.714 | -22.317 | -15.714 | -1837.59231 | -1839.21411 | -1839.06449 | 2.08   | 1.77   | <i>2.02</i>    | 2.32    |
| <b>3be<sup>•</sup></b>                                                                                                                                               | 0     | 140.284 | 157.035 | 106.845 | -22.605 | -15.881 | -1837.59050 | -1839.21061 | -1839.06264 | 3.22   | 3.96   | <i>3.18</i>    | 2.43    |
| <b>3bc<sup>•</sup></b> (CO in ring)                                                                                                                                  | 0     | 140.489 | 156.864 | 107.931 | -23.256 | -16.399 | -1837.56117 | -1839.17881 | -1839.02993 | 21.62  | 23.92  | <i>23.70</i>   | 21.40   |
| <b>3b<sup>-</sup></b>                                                                                                                                                | 0     | 138.938 | 155.999 | 105.068 | -57.377 | -49.851 | -1837.71203 | -1839.33572 | -1839.24471 | -73.05 | -74.54 | <i>-111.08</i> | -109.58 |
| <i>W(CO)<sub>5</sub>PPh<sub>2</sub>NMe<sup>•</sup> (3c<sup>•</sup>) radical complex formation and P-to-N 1,2-W-shift</i>                                             |       |         |         |         |         |         |             |             |             |        |        |                |         |
| <b>3cT</b>                                                                                                                                                           | 0     | 327.468 | 352.355 | 287.878 | -26.709 | -19.615 | -1942.89261 | -1944.74495 | -1944.31443 | -42.73 | -48.54 | <i>-28.65</i>  | -22.84  |
| <b>3c<sup>•</sup> + T<sup>•</sup></b>                                                                                                                                | 0     | 324.726 | 349.804 | 269.362 | -32.648 | -22.876 | -1942.82452 | -1944.66760 | -1944.26878 | 0.00   | 0.00   | <i>0.00</i>    | 0.00    |
| <b>3c<sup>•</sup></b>                                                                                                                                                | 0     | 165.085 | 182.902 | 131.049 | -21.921 | -15.570 | -1534.04264 | -1535.45769 | -1535.27065 | 0.00   | 0.00   | <i>0.00</i>    | 0.00    |
| <b>3ce_ts</b>                                                                                                                                                        | 325i  | 165.651 | 182.822 | 132.286 | -21.635 | -15.255 | -1534.03079 | -1535.44487 | -1535.25536 | 7.43   | 8.04   | <i>9.59</i>    | 8.99    |
| <b>3ce<sup>•</sup></b>                                                                                                                                               | 0     | 166.119 | 183.482 | 132.606 | -22.326 | -15.794 | -1534.04125 | -1535.45390 | -1535.26474 | 0.87   | 2.38   | <i>3.71</i>    | 2.20    |
| <b>3cc_ts</b>                                                                                                                                                        | 239i  | 165.769 | 182.680 | 132.849 | -23.690 | -16.968 | -1534.01841 | -1535.43025 | -1535.24257 | 15.20  | 17.22  | <i>17.62</i>   | 15.61   |
| <b>3cc<sup>•</sup></b> (CO in ring)                                                                                                                                  | 0     | 167.518 | 184.507 | 134.475 | -25.113 | -18.127 | -1534.04309 | -1535.46030 | -1535.27188 | -0.28  | -1.64  | <i>-0.77</i>   | 0.59    |
| <b>3c<sup>-</sup></b>                                                                                                                                                | 0     | 163.696 | 181.725 | 129.226 | -55.244 | -48.157 | -1534.14112 | -1535.55725 | -1535.42505 | -61.80 | -62.47 | <i>-96.88</i>  | -96.21  |
| <i>W(CO)<sub>5</sub>PPh<sub>2</sub>PMe<sup>•</sup> (3d<sup>•</sup>) radical complex formation and P-to-P 1,2-W-shift</i>                                             |       |         |         |         |         |         |             |             |             |        |        |                |         |
| <b>3dT</b>                                                                                                                                                           | 0     | 324.067 | 349.813 | 283.350 | -28.170 | -20.720 | -2229.55551 | -2231.61489 | -2231.19335 | -55.66 | -57.35 | <i>-40.84</i>  | -39.15  |
| <b>3d<sup>•</sup> + T<sup>•</sup></b>                                                                                                                                | 0     | 323.225 | 348.506 | 267.654 | -33.578 | -23.422 | -2229.46682 | -2231.52350 | -2231.12826 | 0.00   | 0.00   | <i>0.00</i>    | 0.00    |
| <b>3d<sup>•</sup></b>                                                                                                                                                | 0     | 163.584 | 181.604 | 129.341 | -22.851 | -16.116 | -1820.68494 | -1822.31359 | -1822.13014 | 0.00   | 0.00   | <i>0.00</i>    | 0.00    |
| <b>3da<sup>•</sup></b>                                                                                                                                               | 0     | 163.093 | 181.337 | 128.550 | -23.605 | -16.799 | -1820.68043 | -1822.30952 | -1822.12842 | 2.83   | 2.55   | <i>1.08</i>    | 1.36    |
| <b>3de_ts</b>                                                                                                                                                        | 0     | 163.182 | 181.425 | 128.608 | -22.475 | -15.847 | -1820.66699 | -1822.29519 | -1822.11248 | 11.26  | 11.55  | <i>11.08</i>   | 10.80   |
| <b>3de<sup>•</sup></b>                                                                                                                                               | 0     | 163.787 | 181.747 | 129.569 | -23.375 | -16.522 | -1820.68249 | -1822.31131 | -1822.12815 | 1.54   | 1.43   | <i>1.25</i>    | 1.36    |
| <b>3dc<sup>•</sup></b> (CO in ring)                                                                                                                                  | 0     | 163.660 | 181.359 | 129.889 | -25.391 | -18.079 | -1820.64891 | -1822.27324 | -1822.09205 | 22.61  | 25.32  | <i>23.90</i>   | 21.20   |
| <b>3d<sup>-</sup></b>                                                                                                                                                | 0     | 161.519 | 180.088 | 126.165 | -57.093 | -49.456 | -1820.77257 | -1822.40225 | -1822.27700 | -54.99 | -55.64 | <i>-92.15</i>  | -91.51  |
| <i>W(CO)<sub>5</sub>PPhPhO<sup>•</sup> (4a<sup>•</sup>) radical complex formation, P-to-O 1,2-W-shift (4ae<sup>•</sup>) and P-to-O 1,2-H-shift (4ap<sup>•</sup>)</i> |       |         |         |         |         |         |             |             |             |        |        |                |         |
| <b>4aT</b>                                                                                                                                                           | 0     | 250.911 | 272.037 | 214.259 | -22.202 | -15.792 | -1692.22753 | -1693.79680 | -1693.47751 | -35.39 | -38.54 | <i>-21.90</i>  | -18.75  |
| <b>4a<sup>•</sup> + T<sup>•</sup></b>                                                                                                                                | 0     | 250.147 | 270.769 | 199.026 | -28.144 | -19.092 | -1692.17113 | -1693.73538 | -1693.44261 | 0.00   | 0.00   | <i>0.00</i>    | 0.00    |
| <b>4a<sup>•</sup></b>                                                                                                                                                | 0     | 90.506  | 103.867 | 60.713  | -17.417 | -11.786 | -1283.38926 | -1284.52547 | -1284.44449 | 0.00   | 0.00   | <i>0.00</i>    | 0.00    |
| <b>4ae_ts</b>                                                                                                                                                        | 161i  | 89.816  | 102.810 | 60.367  | -18.051 | -12.013 | -1283.38453 | -1284.52189 | -1284.44182 | 2.96   | 2.25   | <i>1.67</i>    | 2.39    |
| <b>4ae<sup>•</sup></b>                                                                                                                                               | 0     | 90.173  | 103.494 | 60.521  | -16.515 | -11.216 | -1283.38727 | -1284.52247 | -1284.44089 | 1.24   | 1.88   | <i>2.26</i>    | 1.62    |
| <b>4ap_ts</b>                                                                                                                                                        | 1445i | 88.304  | 101.513 | 58.724  | -19.892 | -12.228 | -1283.33594 | -1284.47157 | -1284.39446 | 33.45  | 33.82  | <i>31.39</i>   | 31.02   |

|                                                                                                                                                                |       |         |         |         |         |         |             |             |             |        |        |                |         |
|----------------------------------------------------------------------------------------------------------------------------------------------------------------|-------|---------|---------|---------|---------|---------|-------------|-------------|-------------|--------|--------|----------------|---------|
| <b>4ap<sup>•</sup></b>                                                                                                                                         | 0     | 91.598  | 104.931 | 61.947  | -29.999 | -16.590 | -1283.40013 | -1284.54299 | -1284.46770 | -6.82  | -11.00 | <i>-14.57</i>  | -10.39  |
| <b>4ac_ts</b>                                                                                                                                                  | 215i  | 89.908  | 102.871 | 60.631  | -17.970 | -12.239 | -1283.36115 | -1284.49962 | -1284.41949 | 17.64  | 16.22  | <i>15.68</i>   | 17.10   |
| <b>4ac<sup>•</sup></b> (CO in ring)                                                                                                                            | 0     | 91.269  | 104.084 | 62.135  | -20.188 | -13.426 | -1283.36494 | -1284.50312 | -1284.42248 | 15.26  | 14.03  | <i>13.81</i>   | 15.04   |
| <b>4a<sup>-</sup></b>                                                                                                                                          | 0     | 89.136  | 102.870 | 58.405  | -52.297 | -46.416 | -1283.51666 | -1284.65577 | -1284.63365 | -79.95 | -81.76 | <i>-118.70</i> | -116.88 |
| <i>W(CO)<sub>5</sub>PHPhS<sup>•</sup> (4b<sup>•</sup>) radical complex formation, P-to-S 1,2-W-shift (4be<sup>•</sup>) and 1,2-H-shift (4bp<sup>•</sup>)</i>   |       |         |         |         |         |         |             |             |             |        |        |                |         |
| <b>4bT</b>                                                                                                                                                     | 0     | 249.199 | 270.799 | 211.779 | -23.694 | -17.013 | -2015.24020 | -2017.03549 | -2016.72210 | -51.29 | -52.82 | <i>-38.12</i>  | -36.59  |
| <b>4b<sup>•</sup> + T<sup>•</sup></b>                                                                                                                          | 0     | 249.206 | 270.046 | 197.752 | -29.510 | -19.571 | -2015.15846 | -2016.95131 | -2016.66134 | 0.00   | 0.00   | <i>0.00</i>    | 0.00    |
| <b>4b<sup>•</sup></b>                                                                                                                                          | 0     | 89.565  | 103.144 | 59.439  | -18.783 | -12.265 | -1606.37659 | -1607.74141 | -1607.66322 | 0.00   | 0.00   | <i>0.00</i>    | 0.00    |
| <b>4be_ts</b>                                                                                                                                                  | 0     | 89.623  | 103.193 | 59.472  | -19.439 | -12.597 | -1606.37130 | -1607.73695 | -1607.65924 | 3.32   | 2.80   | <i>2.50</i>    | 3.02    |
| <b>4be<sup>•</sup></b>                                                                                                                                         | 0     | 89.339  | 102.940 | 59.297  | -16.827 | -11.376 | -1606.37573 | -1607.74056 | -1607.66118 | 0.54   | 0.53   | <i>1.28</i>    | 1.29    |
| <b>4bp_ts</b>                                                                                                                                                  | 982i  | 87.206  | 100.677 | 57.198  | -18.755 | -12.116 | -1606.33538 | -1607.69868 | -1607.62383 | 25.86  | 26.81  | <i>24.72</i>   | 23.77   |
| <b>4bp<sup>•</sup></b>                                                                                                                                         | 0     | 88.987  | 102.667 | 58.847  | -21.264 | -13.147 | -1606.37447 | -1607.74024 | -1607.66440 | 1.33   | 0.73   | <i>-0.74</i>   | -0.14   |
| <b>4bc<sup>•</sup></b> (CO in ring)                                                                                                                            | 0     | 89.664  | 102.938 | 60.012  | -20.322 | -13.370 | -1606.34128 | -1607.70259 | -1607.62525 | 22.16  | 24.36  | <i>23.83</i>   | 21.63   |
| <b>4b<sup>-</sup></b>                                                                                                                                          | 0     | 88.242  | 102.217 | 57.240  | -52.861 | -46.465 | -1606.49518 | -1607.86176 | -1607.84158 | -74.42 | -75.53 | <i>-111.92</i> | -110.81 |
| <i>W(CO)<sub>5</sub>PHPhNMe<sup>•</sup> (4c<sup>•</sup>) radical complex formation, P-to-N 1,2-W-shift (4ce<sup>•</sup>) and 1,2-H-shift (4cp<sup>•</sup>)</i> |       |         |         |         |         |         |             |             |             |        |        |                |         |
| <b>4cT</b>                                                                                                                                                     | 0     | 276.056 | 298.144 | 238.754 | -22.653 | -16.312 | -1711.68265 | -1713.27754 | -1712.92004 | -49.78 | -54.94 | <i>-36.66</i>  | -31.50  |
| <b>4c<sup>•</sup> + T<sup>•</sup></b>                                                                                                                          | 0     | 274.143 | 295.939 | 221.895 | -28.887 | -19.623 | -1711.60332 | -1713.18998 | -1712.86162 | 0.00   | 0.00   | <i>0.00</i>    | 0.00    |
| <b>4c<sup>•</sup></b>                                                                                                                                          | 0     | 114.502 | 129.037 | 83.582  | -18.160 | -12.317 | -1302.82145 | -1303.98008 | -1303.86350 | 0.00   | 0.00   | <i>0.00</i>    | 0.00    |
| <b>4ce_ts</b>                                                                                                                                                  | 0     | 114.413 | 129.047 | 83.432  | -16.946 | -11.505 | -1302.81024 | -1303.96860 | -1303.85097 | 7.04   | 7.20   | <i>7.86</i>    | 7.70    |
| <b>4ce<sup>•</sup></b>                                                                                                                                         | 0     | 115.044 | 129.393 | 84.350  | -17.740 | -12.126 | -1302.82712 | -1303.98385 | -1303.86574 | -3.56  | -2.37  | <i>-1.41</i>   | -2.60   |
| <b>4cp_ts</b>                                                                                                                                                  | 1608i | 112.866 | 127.286 | 82.060  | -19.177 | -12.840 | -1302.77088 | -1303.92808 | -1303.81476 | 31.73  | 32.63  | <i>30.58</i>   | 29.69   |
| <b>4cp<sup>•</sup></b>                                                                                                                                         | 0     | 116.888 | 131.408 | 86.044  | -22.006 | -14.009 | -1302.85128 | -1304.01510 | -1303.89730 | -18.72 | -21.98 | <i>-21.21</i>  | -17.95  |
| <b>4c<sup>-</sup></b>                                                                                                                                          | 0     | 113.088 | 127.944 | 81.621  | -51.237 | -45.169 | -1302.92355 | -1304.08334 | -1304.02224 | -64.07 | -64.80 | <i>-99.61</i>  | -98.88  |
| <i>W(CO)<sub>5</sub>PHPhPMe<sup>•</sup> (4d<sup>•</sup>) radical complex formation, P-to-P 1,2-W-shift (4ce<sup>•</sup>) and 1,2-H-shift (4cp<sup>•</sup>)</i> |       |         |         |         |         |         |             |             |             |        |        |                |         |
| <b>4dT</b>                                                                                                                                                     | 0     | 272.748 | 295.574 | 234.245 | -24.242 | -17.437 | -1998.35008 | -2000.15547 | -1999.80695 | -63.25 | -66.18 | <i>-50.86</i>  | -47.93  |
| <b>4d<sup>•</sup> + T<sup>•</sup></b>                                                                                                                          | 0     | 272.334 | 294.531 | 219.612 | -29.501 | -20.015 | -1998.24929 | -2000.05001 | -1999.72591 | 0.00   | 0.00   | <i>0.00</i>    | 0.00    |
| <b>4d<sup>•</sup></b>                                                                                                                                          | 0     | 112.693 | 127.629 | 81.299  | -18.774 | -12.709 | -1589.46741 | -1590.84010 | -1590.72779 | 0.00   | 0.00   | <i>0.00</i>    | 0.00    |
| <b>4de_ts</b>                                                                                                                                                  | 167i  | 111.509 | 126.230 | 80.490  | -18.432 | -12.453 | -1589.44844 | -1590.82107 | -1590.70964 | 11.91  | 11.94  | <i>11.39</i>   | 11.35   |
| <b>4de<sup>•</sup></b>                                                                                                                                         | 0     | 112.699 | 127.568 | 81.344  | -18.801 | -12.773 | -1589.46685 | -1590.83939 | -1590.72710 | 0.35   | 0.45   | <i>0.43</i>    | 0.33    |
| <b>4dp_ts</b>                                                                                                                                                  | 1163i | 110.345 | 125.282 | 78.848  | -18.917 | -12.991 | -1589.42407 | -1590.79482 | -1590.68686 | 27.20  | 28.41  | <i>25.68</i>   | 24.46   |

|                        |   |         |         |        |         |         |             |             |             |        |        |               |        |
|------------------------|---|---------|---------|--------|---------|---------|-------------|-------------|-------------|--------|--------|---------------|--------|
| <b>4dp<sup>•</sup></b> | 0 | 112.624 | 127.552 | 81.233 | -18.469 | -12.561 | -1589.47133 | -1590.84386 | -1590.73141 | -2.46  | -2.35  | <b>-2.27</b>  | -2.38  |
| <b>4d<sup>-</sup></b>  | 0 | 111.113 | 126.478 | 78.954 | -53.582 | -46.811 | -1589.55188 | -1590.92493 | -1590.87069 | -53.00 | -53.23 | <b>-89.67</b> | -89.45 |

*W(CO)<sub>5</sub>PHPhNH<sup>•</sup> (4ch<sup>•</sup>) radical complex formation, P-to-N 1,2-W-shift (4che<sup>•</sup>) and 1,2-H-shift (4chp<sup>•</sup>)*

|                                        |       |         |         |         |         |         |             |             |             |        |        |                |         |
|----------------------------------------|-------|---------|---------|---------|---------|---------|-------------|-------------|-------------|--------|--------|----------------|---------|
| <b>4chT</b>                            | 0     | 258.458 | 279.716 | 221.787 | -24.799 | -17.194 | -1672.35612 | -1673.91281 | -1673.58376 | -56.99 | -63.05 | <b>-46.42</b>  | -40.36  |
| <b>4ch<sup>•</sup> + T<sup>•</sup></b> | 0     | 256.990 | 277.666 | 205.944 | -30.397 | -19.872 | -1672.26530 | -1673.81233 | -1673.50978 | 0.00   | 0.00   | <b>0.00</b>    | 0.00    |
| <b>4ch<sup>•</sup></b>                 | 0     | 97.349  | 110.764 | 67.631  | -19.670 | -12.566 | -1263.48343 | -1264.60242 | -1264.51166 | 0.00   | 0.00   | <b>0.00</b>    | 0.00    |
| <b>4che_ts</b>                         | 141i  | 97.043  | 110.176 | 67.594  | -19.154 | -12.335 | -1263.47628 | -1264.59655 | -1264.50548 | 4.48   | 3.68   | <b>3.88</b>    | 4.68    |
| <b>4che<sup>•</sup></b>                | 0     | 97.593  | 111.003 | 67.721  | -20.355 | -12.807 | -1263.49205 | -1264.61012 | -1264.51959 | -5.41  | -4.83  | <b>-4.98</b>   | -5.56   |
| <b>4chp_ts</b>                         | 1547i | 95.360  | 108.740 | 65.656  | -22.960 | -13.991 | -1263.43664 | -1264.55514 | -1264.46979 | 29.36  | 29.67  | <b>26.27</b>   | 25.96   |
| <b>4chp<sup>•</sup></b>                | 0     | 99.209  | 112.776 | 69.388  | -25.030 | -14.936 | -1263.51814 | -1264.64316 | -1264.55337 | -21.79 | -25.56 | <b>-26.18</b>  | -22.40  |
| <b>4chc_ts</b>                         | 263i  | 97.303  | 110.198 | 68.120  | -22.529 | -14.386 | -1263.45862 | -1264.57608 | -1264.48744 | 15.57  | 16.53  | <b>15.20</b>   | 14.24   |
| <b>4chc<sup>•</sup> (CO in ring)</b>   | 0     | 99.043  | 111.937 | 69.840  | -26.259 | -16.360 | -1263.48240 | -1264.60385 | -1264.51561 | 0.65   | -0.90  | <b>-2.48</b>   | -0.94   |
| <b>4ch-</b>                            | 0     | 95.662  | 109.740 | 64.833  | -51.424 | -45.648 | -1263.59308 | -1264.71446 | -1264.68087 | -68.81 | -70.30 | <b>-106.18</b> | -104.69 |

*W(CO)<sub>5</sub>PHPhPH<sup>•</sup> (4dh<sup>•</sup>) radical complex formation, P-to-P 1,2-W-shift (4dhe<sup>•</sup>) and 1,2-H-shift (4dhp<sup>•</sup>)*

|                                        |      |         |         |         |         |         |             |             |             |        |        |                |        |
|----------------------------------------|------|---------|---------|---------|---------|---------|-------------|-------------|-------------|--------|--------|----------------|--------|
| <b>4dhT</b>                            | 0    | 254.665 | 276.595 | 216.905 | -23.759 | -16.961 | -1959.00255 | -1960.76485 | -1960.44321 | -65.85 | -67.84 | <b>-52.58</b>  | -50.59 |
| <b>4dh<sup>•</sup> + T<sup>•</sup></b> | 0    | 254.011 | 275.147 | 202.360 | -29.730 | -19.566 | -1958.89761 | -1960.65673 | -1960.35941 | 0.00   | 0.00   | <b>0.00</b>    | 0.00   |
| <b>4dh<sup>•</sup></b>                 | 0    | 94.370  | 108.245 | 64.047  | -19.003 | -12.260 | -1550.11574 | -1551.44682 | -1551.36129 | 0.00   | 0.00   | <b>0.00</b>    | 0.00   |
| <b>4dhe_ts</b>                         | 0    | 93.798  | 107.812 | 63.342  | -17.757 | -11.831 | -1550.10090 | -1551.43256 | -1551.34746 | 9.31   | 8.95   | <b>8.67</b>    | 9.03   |
| <b>4dhe<sup>•</sup></b>                | 0    | 94.515  | 108.304 | 64.364  | -17.214 | -11.612 | -1550.11747 | -1551.44943 | -1551.36236 | -1.09  | -1.64  | <b>-0.67</b>   | -0.12  |
| <b>4dhp_ts</b>                         | 937i | 92.310  | 106.095 | 62.015  | -17.953 | -12.048 | -1550.08032 | -1551.40997 | -1551.32733 | 22.22  | 23.13  | <b>21.31</b>   | 20.41  |
| <b>4dhp<sup>•</sup></b>                | 0    | 94.141  | 108.157 | 63.650  | -17.699 | -11.901 | -1550.12045 | -1551.45178 | -1551.36630 | -2.96  | -3.11  | <b>-3.15</b>   | -3.00  |
| <b>4dhc_ts</b>                         | 0    | 94.433  | 108.260 | 64.167  | -17.706 | -11.784 | -1550.11466 | -1551.44577 | -1551.35928 | 0.68   | 0.66   | <b>1.26</b>    | 1.27   |
| <b>4dhc<sup>•</sup> (CO in ring)</b>   | 0    | 94.605  | 108.096 | 64.825  | -21.021 | -13.811 | -1550.08011 | -1551.40669 | -1551.32238 | 22.36  | 25.19  | <b>24.41</b>   | 21.59  |
| <b>4dh<sup>-</sup></b>                 | 0    | 92.765  | 107.145 | 61.509  | -54.099 | -47.387 | -1550.21475 | -1551.54737 | -1551.52186 | -62.13 | -63.09 | <b>-100.76</b> | -99.79 |

**Table S2.** TPSS-D3/def2-TZVP + COSMO optimized Cartesian coordinates (in Å) in THF solution. Each structure is labeled by a specific name (See **Table S1**), followed by the number of atoms, the total energy (in hartrees), and the detailed atomic coordinates (in double-column text list). For simplicity, T = TEMP and Pc = cyclic PNMeCH<sub>2</sub>CH<sub>2</sub>NMe five-ring are used in molecule formula.

|                                                                                              |            |            |            |                                                                |            |            |            |
|----------------------------------------------------------------------------------------------|------------|------------|------------|----------------------------------------------------------------|------------|------------|------------|
| <b>1ae_ts</b> : P-to-O 1,2-Fe-shift of [Fe(CO) <sub>4</sub> ]PPh <sub>2</sub> O <sup>•</sup> |            |            | C          | -4.4619498                                                     | -1.4164531 | 1.7330687  |            |
| 33                                                                                           |            |            | O          | -4.6920032                                                     | -1.8256435 | 2.7776117  |            |
| Energy = -2597.761473466                                                                     |            |            | C          | -4.0007979                                                     | -2.4492250 | -0.5595307 |            |
| P                                                                                            | -0.1249353 | 0.5149449  | 0.1281275  | O                                                              | -3.9636280 | -3.5333899 | -0.9490626 |
| Fe                                                                                           | -0.3578221 | -1.9468245 | -0.2811570 | O                                                              | -4.8685288 | 0.8679780  | 0.6885853  |
| C                                                                                            | 0.7671887  | -3.3897011 | -0.4419892 | C                                                              | -3.1113703 | 2.6332716  | 1.7737850  |
| O                                                                                            | 1.3984244  | -4.3438959 | -0.5543612 | C                                                              | -2.3188295 | 3.7928827  | 1.7264933  |
| C                                                                                            | -0.3450053 | -1.5046585 | -2.0572920 | C                                                              | -2.8530225 | 1.6788349  | 2.7662390  |
| O                                                                                            | -0.3153362 | -1.2458351 | -3.1745235 | C                                                              | -1.2724747 | 3.9708621  | 2.6288422  |
| C                                                                                            | -0.5678497 | -2.0587995 | 1.5349901  | H                                                              | -2.5106363 | 4.5502267  | 0.9702228  |
| O                                                                                            | -0.6703672 | -2.1257702 | 2.6755104  | C                                                              | -1.8016954 | 1.8544993  | 3.6675061  |
| C                                                                                            | -1.9577824 | -2.6872229 | -0.4992579 | H                                                              | -3.4813984 | 0.7963416  | 2.8303635  |
| O                                                                                            | -2.9869955 | -3.1900898 | -0.6444247 | C                                                              | -1.0069350 | 2.9991489  | 3.5992446  |
| O                                                                                            | 1.0859468  | -0.5088552 | 0.0434449  | H                                                              | -0.6584603 | 4.8656578  | 2.5727263  |
| C                                                                                            | 0.1297652  | 1.4758888  | 1.6568816  | H                                                              | -1.6062134 | 1.0989955  | 4.4237447  |
| C                                                                                            | -0.6922875 | 2.5691850  | 1.9726658  | H                                                              | -0.1887859 | 3.1385290  | 4.3001307  |
| C                                                                                            | 1.1165338  | 1.0644407  | 2.5640554  | C                                                              | -3.7482162 | 2.7586933  | -0.9768992 |
| C                                                                                            | -0.5056157 | 3.2604225  | 3.1671882  | C                                                              | -2.3928840 | 2.5049704  | -1.2491802 |
| H                                                                                            | -1.4680808 | 2.8886557  | 1.2817500  | C                                                              | -4.5768362 | 3.2059871  | -2.0180265 |
| C                                                                                            | 1.2936443  | 1.7564776  | 3.7631707  | C                                                              | -1.8866294 | 2.6743518  | -2.5364274 |
| H                                                                                            | 1.7441036  | 0.2136018  | 2.3166678  | H                                                              | -1.7334560 | 2.1826378  | -0.4495669 |
| C                                                                                            | 0.4849504  | 2.8530620  | 4.0671697  | C                                                              | -4.0707303 | 3.3776937  | -3.3060645 |
| H                                                                                            | -1.1374717 | 4.1125468  | 3.4015821  | H                                                              | -5.6250037 | 3.4124854  | -1.8134417 |
| H                                                                                            | 2.0656553  | 1.4390906  | 4.4588577  | C                                                              | -2.7254895 | 3.1077124  | -3.5665775 |
| H                                                                                            | 0.6236656  | 3.3896186  | 5.0014151  | H                                                              | -0.8386608 | 2.4701813  | -2.7376444 |
| C                                                                                            | 0.0979181  | 1.7256734  | -1.2174819 | H                                                              | -4.7221249 | 3.7211801  | -4.1047038 |
| C                                                                                            | 1.3302852  | 1.7977389  | -1.8817027 | H                                                              | -2.3293292 | 3.2395377  | -4.5695334 |
| C                                                                                            | -0.9625768 | 2.5466443  | -1.6253110 | <b>1aT</b> : [Fe(CO) <sub>4</sub> ]PPh <sub>2</sub> OT complex |            |            |            |
| C                                                                                            | 1.5047267  | 2.7035667  | -2.9273604 | 61                                                             |            |            |            |
| H                                                                                            | 2.1400393  | 1.1419535  | -1.5750015 | Energy = -3006.580123413                                       |            |            |            |
| C                                                                                            | -0.7804384 | 3.4570765  | -2.6658063 | P                                                              | 0.4906732  | 0.4847869  | -0.2413181 |
| H                                                                                            | -1.9317606 | 2.4684133  | -1.1388656 | Fe                                                             | 0.5614658  | -1.0945891 | -1.7861084 |
| C                                                                                            | 0.4522330  | 3.5351099  | -3.3187518 | C                                                              | -0.9175064 | -2.0931635 | -1.9309004 |
| H                                                                                            | 2.4616983  | 2.7589082  | -3.4390419 | O                                                              | -1.8610512 | -2.7547798 | -2.0454000 |
| H                                                                                            | -1.6034650 | 4.0944966  | -2.9764227 | C                                                              | 1.2588833  | -2.2361661 | -0.5895469 |
| H                                                                                            | 0.5901271  | 4.2377482  | -4.1356866 | O                                                              | 1.7278366  | -2.9948542 | 0.1434974  |
| <b>1ae<sup>•</sup></b> : PPh <sub>2</sub> O[Fe(CO) <sub>4</sub> ] <sup>•</sup> complex       |            |            | C          | -0.0563060                                                     | 0.0685940  | -3.0058837 |            |
| 33                                                                                           |            |            | O          | -0.4294246                                                     | 0.7899097  | -3.8264642 |            |
| Energy = -2597.761085704                                                                     |            |            | C          | 2.0111617                                                      | -1.3187001 | -2.7935546 |            |
| P                                                                                            | -4.5440911 | 2.4354225  | 0.6479584  | O                                                              | 2.9498287  | -1.4747009 | -3.4592617 |
| Fe                                                                                           | -4.0506504 | -0.7669866 | 0.0548903  | O                                                              | -0.8545468 | 0.7096495  | 0.6952862  |
| C                                                                                            | -2.2482302 | -0.5608413 | 0.3212872  | C                                                              | 0.7727096  | 2.1984795  | -0.8239859 |
| O                                                                                            | -1.1096838 | -0.4981583 | 0.4638852  | C                                                              | 0.1260103  | 3.2897375  | -0.2289653 |
| C                                                                                            | -4.0904223 | -0.2191186 | -1.7156542 | C                                                              | 1.7154473  | 2.4268042  | -1.8345832 |
| O                                                                                            | -4.0980994 | -0.0316998 | -2.8457270 | C                                                              | 0.4062974  | 4.5876719  | -0.6548760 |



|   |            |            |            |
|---|------------|------------|------------|
| H | -0.5968968 | 3.1202928  | 0.5611937  |
| C | 2.0026468  | 3.7255868  | -2.2512975 |
| H | 2.2218865  | 1.5837237  | -2.2970407 |
| C | 1.3446779  | 4.8088163  | -1.6652769 |
| H | -0.1080825 | 5.4271598  | -0.1955278 |
| H | 2.7341704  | 3.8904630  | -3.0371314 |
| H | 1.5614448  | 5.8207337  | -1.9952210 |
| C | 1.7823947  | 0.4136319  | 1.0560231  |
| C | 1.5221934  | 0.8265599  | 2.3694913  |
| C | 3.0781966  | 0.0125521  | 0.7066545  |
| C | 2.5407628  | 0.8175987  | 3.3217758  |
| H | 0.5237560  | 1.1484304  | 2.6434689  |
| C | 4.0978674  | 0.0147248  | 1.6572250  |
| H | 3.2862818  | -0.3047265 | -0.3117719 |
| C | 3.8298672  | 0.4128944  | 2.9684424  |
| H | 2.3272740  | 1.1289907  | 4.3405018  |
| H | 5.0984336  | -0.3004497 | 1.3755324  |
| H | 4.6215928  | 0.4062981  | 3.7120759  |
| C | -2.2011946 | -0.9618289 | 1.7441069  |
| C | -3.4643750 | -1.8254793 | 1.5393026  |
| C | -4.6886913 | -1.0086325 | 1.1372802  |
| C | -4.3688147 | -0.2385281 | -0.1402989 |
| C | -3.1411950 | 0.6866487  | 0.0031931  |
| H | -5.5441393 | -1.6729862 | 0.9703980  |
| H | -3.2518228 | -2.5616867 | 0.7539697  |
| H | -3.6385525 | -2.3782525 | 2.4696318  |
| H | -4.1660439 | -0.9532278 | -0.9478057 |
| H | -5.2140609 | 0.3836300  | -0.4564103 |
| H | -4.9776455 | -0.3217014 | 1.9417610  |
| N | -2.0210130 | -0.1884435 | 0.4743507  |
| C | -2.3091314 | -0.1204202 | 3.0314351  |
| H | -1.5467417 | 0.6613757  | 3.0468903  |
| H | -3.2874728 | 0.3479428  | 3.1488856  |
| H | -2.1453949 | -0.7737560 | 3.8947590  |
| C | -1.0037160 | -1.9099267 | 1.8698906  |
| H | -0.9158193 | -2.5206689 | 0.9690744  |
| H | -0.0692978 | -1.3648153 | 2.0272305  |
| H | -1.1548948 | -2.5734162 | 2.7275993  |
| C | -2.7673840 | 1.1857270  | -1.3966492 |
| H | -1.9030819 | 1.8547162  | -1.3715413 |
| H | -2.5463137 | 0.3376413  | -2.0478833 |
| H | -3.6103081 | 1.7406782  | -1.8210544 |
| C | -3.4642982 | 1.9011528  | 0.8960634  |
| H | -2.5484319 | 2.4175455  | 1.1913906  |
| H | -4.0139346 | 1.6279755  | 1.7979663  |
| H | -4.0830768 | 2.6026360  | 0.3268446  |

**1a<sup>-</sup>** : [Fe(CO)<sub>4</sub>]PPh<sub>2</sub>O<sup>-</sup> anion complex

33

Energy = -2597.958500712

|    |            |            |            |
|----|------------|------------|------------|
| P  | -2.3300568 | 0.7449500  | 0.0023601  |
| Fe | -4.0969690 | -0.7157359 | -0.1029778 |
| C  | -5.4028209 | -1.9225575 | -0.2117200 |
| O  | -6.2513001 | -2.7140615 | -0.2842992 |
| C  | -3.4356907 | -1.1212679 | -1.7056117 |
| O  | -3.0196700 | -1.4013297 | -2.7584177 |
| C  | -3.3650684 | -1.4420651 | 1.3502797  |
| O  | -2.9157878 | -1.9393629 | 2.3034831  |
| C  | -5.2296018 | 0.6330232  | 0.1296752  |
| O  | -6.0106008 | 1.4863618  | 0.2864812  |
| O  | -0.9435479 | 0.1238370  | -0.0284579 |
| C  | -2.4658552 | 1.7617279  | 1.5285058  |
| C  | -3.2788560 | 2.8994913  | 1.6172396  |
| C  | -1.7274909 | 1.3624728  | 2.6504242  |
| C  | -3.3596915 | 3.6193999  | 2.8091705  |
| H  | -3.8433662 | 3.2287867  | 0.7499389  |
| C  | -1.8099040 | 2.0803478  | 3.8443519  |
| H  | -1.0826970 | 0.4917738  | 2.5725770  |
| C  | -2.6281477 | 3.2095273  | 3.9272740  |
| H  | -3.9897365 | 4.5035798  | 2.8652058  |
| H  | -1.2322388 | 1.7617861  | 4.7085097  |
| H  | -2.6913386 | 3.7710257  | 4.8557552  |
| C  | -2.4261697 | 2.0543330  | -1.2899069 |
| C  | -1.3559246 | 2.9618974  | -1.3549724 |
| C  | -3.4742719 | 2.1766379  | -2.2060992 |
| C  | -1.3428316 | 3.9750073  | -2.3110607 |
| H  | -0.5322811 | 2.8630588  | -0.6525885 |
| C  | -3.4632530 | 3.1914477  | -3.1669893 |
| H  | -4.2971074 | 1.4691615  | -2.1682950 |
| C  | -2.4000498 | 4.0930727  | -3.2197645 |
| H  | -0.5101508 | 4.6727210  | -2.3505666 |
| H  | -4.2842919 | 3.2747971  | -3.8744178 |
| H  | -2.3904987 | 4.8827204  | -3.9665413 |

**1a<sup>•</sup>** : [Fe(CO)<sub>4</sub>]PPh<sub>2</sub>O<sup>•</sup>

33

Energy = -2597.795855365

|    |            |            |            |
|----|------------|------------|------------|
| P  | -2.3162188 | 0.8297979  | 0.0613478  |
| Fe | -3.9403374 | -0.7915399 | -0.1547620 |
| C  | -4.7838254 | -2.3918971 | -0.3603158 |
| O  | -5.3316282 | -3.3931458 | -0.4915787 |
| C  | -3.6333133 | -0.6334461 | -1.9494551 |
| O  | -3.4759483 | -0.5487035 | -3.0835414 |
| C  | -3.6437991 | -1.0802995 | 1.6266809  |
| O  | -3.5041804 | -1.2687168 | 2.7501164  |
| C  | -5.3858750 | 0.2676409  | 0.0104063  |
| O  | -6.3168451 | 0.9353886  | 0.1360564  |
| O  | -1.0151986 | 0.0491803  | 0.0776566  |
| C  | -2.5160253 | 1.8084402  | 1.5858685  |
| C  | -3.5243072 | 2.7711089  | 1.7338380  |
| C  | -1.6378464 | 1.5519613  | 2.6466462  |

|   |            |           |            |
|---|------------|-----------|------------|
| C | -3.6540270 | 3.4668520 | 2.9339528  |
| H | -4.2029808 | 2.9878685 | 0.9143333  |
| C | -1.7684260 | 2.2546045 | 3.8453024  |
| H | -0.8581018 | 0.8066108 | 2.5212507  |
| C | -2.7767537 | 3.2086925 | 3.9913548  |
| H | -4.4359064 | 4.2128301 | 3.0437812  |
| H | -1.0823448 | 2.0561767 | 4.6638861  |
| H | -2.8790074 | 3.7532665 | 4.9256806  |
| C | -2.3363143 | 2.0767925 | -1.2678149 |
| C | -1.0958566 | 2.4697322 | -1.7898835 |
| C | -3.5116623 | 2.6509902 | -1.7684454 |
| C | -1.0356936 | 3.4382995 | -2.7916704 |
| H | -0.1891504 | 2.0058310 | -1.4127534 |
| C | -3.4476209 | 3.6214090 | -2.7671460 |
| H | -4.4819154 | 2.3366210 | -1.3958327 |
| C | -2.2095540 | 4.0171732 | -3.2785904 |
| H | -0.0720967 | 3.7379870 | -3.1938789 |
| H | -4.3632739 | 4.0605888 | -3.1523561 |
| H | -2.1612327 | 4.7684703 | -4.0615891 |

**1be<sub>ts</sub>** : P-to-S 1,2-Fe-shift of [Fe(CO)<sub>4</sub>]PPh<sub>2</sub>S\*

33

Energy = -2920.747479697

|    |            |            |            |
|----|------------|------------|------------|
| P  | -0.0218423 | 0.5108500  | 0.2543812  |
| S  | 1.6473510  | -0.7095160 | 0.1455985  |
| C  | 0.1745470  | 1.5857466  | 1.7168501  |
| C  | 0.0134940  | 1.6654449  | -1.1567684 |
| C  | -0.5591129 | 2.7834328  | 1.7782581  |
| C  | 0.9375138  | 1.1856990  | 2.8229468  |
| C  | 1.1460783  | 2.4417923  | -1.4424253 |
| C  | -1.1265091 | 1.7732870  | -1.9624562 |
| C  | -0.5100633 | 3.5747522  | 2.9232537  |
| H  | -1.1554406 | 3.0999413  | 0.9265890  |
| C  | 0.9793904  | 1.9816297  | 3.9679378  |
| H  | 1.5074090  | 0.2621240  | 2.7744456  |
| C  | 1.1316769  | 3.3195093  | -2.5231245 |
| H  | 2.0334449  | 2.3523813  | -0.8220428 |
| C  | -1.1372758 | 2.6535457  | -3.0464926 |
| H  | -2.0019959 | 1.1682920  | -1.7408674 |
| C  | 0.2572976  | 3.1755494  | 4.0220694  |
| H  | -1.0690808 | 4.5056941  | 2.9576094  |
| H  | 1.5819458  | 1.6701151  | 4.8166479  |
| C  | -0.0096259 | 3.4256436  | -3.3256785 |
| H  | 2.0095856  | 3.9203807  | -2.7431731 |
| H  | -2.0227557 | 2.7331364  | -3.6703644 |
| H  | 0.2928632  | 3.7941296  | 4.9141857  |
| H  | -0.0156938 | 4.1096694  | -4.1695331 |
| Fe | -0.2629844 | -2.0525084 | -0.3530160 |
| C  | 0.4145325  | -3.7209553 | -0.6443771 |
| C  | 0.0203524  | -1.5288179 | -2.0790679 |
| C  | -0.3727173 | -2.2718452 | 1.4601565  |

|   |            |            |            |
|---|------------|------------|------------|
| C | -2.0218357 | -2.2648970 | -0.5961640 |
| O | 0.7813155  | -4.7949831 | -0.8387388 |
| O | 0.2427970  | -1.2473665 | -3.1703162 |
| O | -0.4058350 | -2.4169680 | 2.5984837  |
| O | -3.1535101 | -2.4186461 | -0.7573566 |

**1be\*** : PPh<sub>2</sub>S[Fe(CO)<sub>4</sub>]\* radical complex

33

Energy = -2920.747011393

|    |            |            |            |
|----|------------|------------|------------|
| P  | -4.5721254 | 2.7382455  | 0.6348261  |
| Fe | -3.9548252 | -0.9122715 | 0.0765640  |
| C  | -2.2274335 | -0.4207442 | 0.3925944  |
| O  | -1.1202028 | -0.1712030 | 0.5747829  |
| C  | -4.1226446 | -0.2572883 | -1.6321262 |
| O  | -4.2661079 | 0.0699969  | -2.7205393 |
| C  | -4.3148284 | -1.4937345 | 1.7697994  |
| O  | -4.5169412 | -1.8525340 | 2.8413151  |
| C  | -3.6070411 | -2.5727993 | -0.5259371 |
| O  | -3.3859809 | -3.6389302 | -0.8994209 |
| S  | -5.3920834 | 0.8037456  | 0.7201920  |
| C  | -3.1292923 | 2.6914791  | 1.7665613  |
| C  | -2.1541674 | 3.6992959  | 1.6637998  |
| C  | -3.0373123 | 1.7688782  | 2.8168037  |
| C  | -1.0937994 | 3.7517523  | 2.5667320  |
| H  | -2.2172560 | 4.4381505  | 0.8693643  |
| C  | -1.9773517 | 1.8254308  | 3.7219430  |
| H  | -3.8018301 | 1.0053990  | 2.9210716  |
| C  | -0.9979456 | 2.8112184  | 3.5957578  |
| H  | -0.3400890 | 4.5275839  | 2.4645375  |
| H  | -1.9166083 | 1.0955192  | 4.5245547  |
| H  | -0.1686520 | 2.8513080  | 4.2960666  |
| C  | -3.7908910 | 2.8884465  | -1.0158464 |
| C  | -2.4562995 | 2.5586513  | -1.2969431 |
| C  | -4.6135500 | 3.3451506  | -2.0580919 |
| C  | -1.9602701 | 2.6723227  | -2.5950906 |
| H  | -1.8023032 | 2.2248179  | -0.4993390 |
| C  | -4.1184760 | 3.4509066  | -3.3564588 |
| H  | -5.6467636 | 3.6105718  | -1.8472417 |
| C  | -2.7901252 | 3.1139300  | -3.6274149 |
| H  | -0.9255906 | 2.4125012  | -2.8007995 |
| H  | -4.7662490 | 3.8010455  | -4.1550677 |
| H  | -2.4022302 | 3.1997235  | -4.6384040 |

**1bT** : [Fe(CO)<sub>4</sub>]PPh<sub>2</sub>ST complex

61

Energy = -3329.586351941

|    |           |            |            |
|----|-----------|------------|------------|
| P  | 0.8365092 | 0.1158984  | 0.2713925  |
| Fe | 0.6647140 | -2.0030271 | -0.4582428 |
| C  | 0.5620903 | -3.6765765 | -1.0612578 |
| O  | 0.4956478 | -4.7619080 | -1.4535120 |
| C  | 0.5352879 | -2.5718704 | 1.2359972  |

|   |            |            |            |
|---|------------|------------|------------|
| O | 0.4846977  | -2.9979204 | 2.3130451  |
| C | -0.7412418 | -1.5744563 | -1.4870220 |
| O | -1.6278331 | -1.3924992 | -2.2138785 |
| C | 2.3411525  | -1.8310953 | -1.0489529 |
| O | 3.4378862  | -1.7658388 | -1.4236825 |
| S | -0.8091903 | 1.1239402  | 1.2482572  |
| C | 1.4305408  | 1.3119224  | -0.9727095 |
| C | 1.7634470  | 2.6164013  | -0.5712882 |
| C | 1.4877474  | 0.9730817  | -2.3278137 |
| C | 2.1584910  | 3.5588479  | -1.5151725 |
| H | 1.7068503  | 2.8914028  | 0.4778672  |
| C | 1.8791649  | 1.9220817  | -3.2735650 |
| H | 1.2228833  | -0.0321002 | -2.6402855 |
| C | 2.2163650  | 3.2131802  | -2.8694825 |
| H | 2.4176943  | 4.5644366  | -1.1970567 |
| H | 1.9190591  | 1.6499297  | -4.3241335 |
| H | 2.5224554  | 3.9513901  | -3.6050959 |
| C | 2.0355687  | 0.3166461  | 1.6356999  |
| C | 1.6559433  | 0.0805685  | 2.9653134  |
| C | 3.3778912  | 0.6052337  | 1.3439199  |
| C | 2.6019102  | 0.1495515  | 3.9872689  |
| H | 0.6235181  | -0.1554678 | 3.1995690  |
| C | 4.3206676  | 0.6628314  | 2.3681437  |
| H | 3.6852224  | 0.7833882  | 0.3187170  |
| C | 3.9344996  | 0.4403645  | 3.6918807  |
| H | 2.2957748  | -0.0264361 | 5.0142404  |
| H | 5.3572956  | 0.8837171  | 2.1312616  |
| H | 4.6702322  | 0.4917490  | 4.4891520  |
| C | -3.2004398 | -0.1020755 | 1.3408649  |
| C | -4.3906252 | -0.5647686 | 0.4803012  |
| C | -5.0618301 | 0.5678873  | -0.2864110 |
| C | -4.0258721 | 1.2114762  | -1.1995986 |
| C | -2.8089495 | 1.7781972  | -0.4441159 |
| H | -5.8957940 | 0.1771830  | -0.8805342 |
| H | -4.0244010 | -1.3117087 | -0.2353514 |
| H | -5.0998907 | -1.0688226 | 1.1471135  |
| H | -3.6660710 | 0.4609296  | -1.9136544 |
| H | -4.4623585 | 2.0336003  | -1.7787798 |
| H | -5.4860475 | 1.3071075  | 0.4042316  |
| N | -2.2545693 | 0.6924726  | 0.4585295  |
| C | -3.6840619 | 0.6905785  | 2.5705139  |
| H | -2.8269786 | 1.1029445  | 3.1144783  |
| H | -4.3556243 | 1.5101176  | 2.3091332  |
| H | -4.2207893 | 0.0164563  | 3.2466531  |
| C | -2.4802708 | -1.3581763 | 1.8358320  |
| H | -3.2047023 | -2.0013311 | 2.3464382  |
| H | -2.0461664 | -1.9057868 | 0.9966336  |
| H | -1.6842278 | -1.1148499 | 2.5435369  |
| C | -1.7466634 | 2.1366117  | -1.4865951 |
| H | -0.8952124 | 2.6502993  | -1.0352706 |
| H | -1.3883300 | 1.2415982  | -1.9992568 |

|   |            |           |            |
|---|------------|-----------|------------|
| H | -2.1943008 | 2.8059927 | -2.2287105 |
| C | -3.1838516 | 3.0639655 | 0.3174276  |
| H | -2.3429086 | 3.3937358 | 0.9370009  |
| H | -4.0587514 | 2.9361838 | 0.9572196  |
| H | -3.4064519 | 3.8580944 | -0.4034390 |

**1b<sup>-</sup>** : [Fe(CO)<sub>4</sub>]PPh<sub>2</sub>S<sup>-</sup> anion complex

33

Energy = -2920.921731961

|    |            |            |            |
|----|------------|------------|------------|
| P  | -2.3203392 | 0.7439965  | -0.0204335 |
| S  | -0.5018697 | -0.0863313 | -0.1313598 |
| C  | -2.4103120 | 1.7448919  | 1.5233037  |
| C  | -2.4246434 | 2.0670496  | -1.2969925 |
| C  | -3.1975557 | 2.9021171  | 1.5965956  |
| C  | -1.7142204 | 1.3191470  | 2.6606118  |
| C  | -1.4345585 | 3.0628222  | -1.2967785 |
| C  | -3.4277113 | 2.1046628  | -2.2684722 |
| C  | -3.2861850 | 3.6201431  | 2.7893196  |
| H  | -3.7344679 | 3.2486288  | 0.7191929  |
| C  | -1.8101163 | 2.0324491  | 3.8555094  |
| H  | -1.0866322 | 0.4349419  | 2.5903713  |
| C  | -1.4585349 | 4.0817545  | -2.2447774 |
| H  | -0.6436087 | 3.0246940  | -0.5526332 |
| C  | -3.4463282 | 3.1213576  | -3.2280735 |
| H  | -4.1941848 | 1.3359073  | -2.2711657 |
| C  | -2.5958855 | 3.1856122  | 3.9233756  |
| H  | -3.8920229 | 4.5216595  | 2.8317707  |
| H  | -1.2649177 | 1.6921743  | 4.7322132  |
| C  | -2.4659475 | 4.1126364  | -3.2161973 |
| H  | -0.6907014 | 4.8509523  | -2.2314889 |
| H  | -4.2296776 | 3.1368618  | -3.9812991 |
| H  | -2.6651461 | 3.7458438  | 4.8520957  |
| H  | -2.4815869 | 4.9054060  | -3.9594068 |
| Fe | -4.1257581 | -0.6832636 | -0.0897882 |
| C  | -5.4917535 | -1.8188830 | -0.1698824 |
| C  | -3.4857510 | -1.2028984 | -1.6729491 |
| C  | -3.4360224 | -1.4244176 | 1.3816533  |
| C  | -5.2121289 | 0.7133061  | 0.0959246  |
| O  | -6.3823445 | -2.5628701 | -0.2248055 |
| O  | -3.0934172 | -1.5617495 | -2.7086207 |
| O  | -3.0221929 | -1.9312141 | 2.3437215  |
| O  | -5.9607446 | 1.5991778  | 0.2180110  |

**1b<sup>•</sup>** : [Fe(CO)<sub>4</sub>]PPh<sub>2</sub>S<sup>•</sup> radical complex

33

Energy = -2920.765636915

|   |            |            |            |
|---|------------|------------|------------|
| P | -2.4468109 | 0.8312615  | 0.0448622  |
| S | -0.9151993 | -0.4510689 | -0.0177853 |
| C | -2.4957384 | 1.8145872  | 1.5783328  |
| C | -2.3867136 | 2.0911872  | -1.2688857 |

|    |            |            |            |
|----|------------|------------|------------|
| C  | -3.4070992 | 2.8747771  | 1.6929466  |
| C  | -1.6645142 | 1.4874664  | 2.6548914  |
| C  | -1.1427035 | 2.6035919  | -1.6610342 |
| C  | -3.5588898 | 2.5790571  | -1.8587963 |
| C  | -3.4813161 | 3.6011341  | 2.8791955  |
| H  | -4.0518655 | 3.1371882  | 0.8590741  |
| C  | -1.7401950 | 2.2217152  | 3.8388454  |
| H  | -0.9643799 | 0.6628511  | 2.5554247  |
| C  | -1.0774315 | 3.6015159  | -2.6311592 |
| H  | -0.2337528 | 2.2094939  | -1.2149307 |
| C  | -3.4889219 | 3.5806074  | -2.8272009 |
| H  | -4.5252709 | 2.1740039  | -1.5742674 |
| C  | -2.6477459 | 3.2758898  | 3.9531238  |
| H  | -4.1865005 | 4.4226841  | 2.9646176  |
| H  | -1.0883153 | 1.9698200  | 4.6702814  |
| C  | -2.2493174 | 4.0925070  | -3.2131536 |
| H  | -0.1113147 | 3.9929612  | -2.9360830 |
| H  | -4.4010073 | 3.9531665  | -3.2839036 |
| H  | -2.7048836 | 3.8464413  | 4.8755569  |
| H  | -2.1948219 | 4.8666727  | -3.9729231 |
| Fe | -4.0199568 | -0.7817172 | -0.1501081 |
| C  | -4.6890590 | -2.4496620 | -0.3408635 |
| C  | -3.6879650 | -0.6963641 | -1.9432395 |
| C  | -3.7486225 | -1.0742143 | 1.6325050  |
| C  | -5.5259888 | 0.2006600  | -0.0328778 |
| O  | -5.1169846 | -3.5106490 | -0.4648792 |
| O  | -3.5191323 | -0.6595850 | -3.0796558 |
| O  | -3.6306227 | -1.2670375 | 2.7591784  |
| O  | -6.4842263 | 0.8356235  | 0.0614568  |

**1ce\_ts** : 1,2-Fe-shift of [Fe(CO)<sub>4</sub>]PPh<sub>2</sub>NMe<sup>•</sup>  
37

Energy = -2617.190555351

|    |            |            |            |
|----|------------|------------|------------|
| P  | -0.3539935 | 0.4484105  | 0.2089974  |
| Fe | -0.0851532 | -2.1902055 | 0.0041147  |
| C  | 1.1921006  | -3.4779487 | 0.1228385  |
| O  | 1.9727193  | -4.3222473 | 0.2009284  |
| C  | 0.1242059  | -1.9347225 | -1.7905736 |
| O  | 0.3357568  | -1.8413103 | -2.9174886 |
| C  | -0.3839855 | -2.0376036 | 1.8122766  |
| O  | -0.5061910 | -1.9229945 | 2.9475119  |
| C  | -1.5442283 | -3.1995837 | -0.2503600 |
| O  | -2.4896598 | -3.8395271 | -0.4229094 |
| C  | -0.0528285 | 1.8905628  | 1.2954362  |
| C  | -0.7832842 | 3.0791910  | 1.1316765  |
| C  | 0.8352656  | 1.7741816  | 2.3752133  |
| C  | -0.6063997 | 4.1400581  | 2.0178383  |
| H  | -1.4787073 | 3.1781053  | 0.3021922  |
| C  | 1.0129544  | 2.8399829  | 3.2575189  |
| H  | 1.3870153  | 0.8476602  | 2.5084245  |
| C  | 0.2931344  | 4.0243644  | 3.0821130  |

|   |            |            |            |
|---|------------|------------|------------|
| H | -1.1682056 | 5.0595406  | 1.8772536  |
| H | 1.7142207  | 2.7461077  | 4.0823640  |
| H | 0.4298372  | 4.8526873  | 3.7715334  |
| C | -0.4916946 | 1.2215904  | -1.4444893 |
| C | 0.4504903  | 2.1588320  | -1.9000790 |
| C | -1.5343281 | 0.8303175  | -2.2959556 |
| C | 0.3569351  | 2.6785568  | -3.1899136 |
| H | 1.2487504  | 2.4868410  | -1.2402995 |
| C | -1.6324213 | 1.3568939  | -3.5840335 |
| H | -2.2685077 | 0.1100390  | -1.9432038 |
| C | -0.6839799 | 2.2777673  | -4.0327631 |
| H | 1.0930867  | 3.3979820  | -3.5379015 |
| H | -2.4467168 | 1.0513947  | -4.2349242 |
| H | -0.7566781 | 2.6872222  | -5.0364065 |
| N | 0.9951483  | -0.5069426 | 0.3365627  |
| C | 2.3027013  | -0.2375715 | -0.2493529 |
| H | 2.7478435  | 0.6466960  | 0.2265051  |
| H | 2.9628228  | -1.0911355 | -0.0673279 |
| H | 2.2633498  | -0.0587213 | -1.3350541 |

**1ce<sup>•</sup>** : PPh<sub>2</sub>NMe[Fe(CO)<sub>4</sub>]<sup>•</sup> radical complex  
37

Energy = -2617.190851996

|    |            |            |            |
|----|------------|------------|------------|
| P  | -0.1843471 | 0.3924298  | 0.2782519  |
| Fe | 0.3678583  | -2.2267149 | -0.0310535 |
| C  | 1.7896917  | -3.3452721 | 0.1397623  |
| O  | 2.6755277  | -4.0734554 | 0.2528056  |
| C  | 0.6188540  | -1.8866340 | -1.8052926 |
| O  | 0.8579432  | -1.7158865 | -2.9172287 |
| C  | -0.0773410 | -2.1499859 | 1.7526335  |
| O  | -0.2958740 | -2.0870536 | 2.8775168  |
| C  | -0.9250976 | -3.4148259 | -0.3898878 |
| O  | -1.7633800 | -4.1711934 | -0.6311862 |
| C  | 0.0429556  | 1.8708409  | 1.3342223  |
| C  | -0.7321184 | 3.0267696  | 1.1451745  |
| C  | 0.9263069  | 1.8092220  | 2.4227436  |
| C  | -0.6035735 | 4.1092083  | 2.0139976  |
| H  | -1.4250568 | 3.0841451  | 0.3099205  |
| C  | 1.0574867  | 2.8966073  | 3.2860406  |
| H  | 1.5117135  | 0.9070589  | 2.5777608  |
| C  | 0.2932020  | 4.0487338  | 3.0847335  |
| H  | -1.2005159 | 5.0029784  | 1.8536228  |
| H  | 1.7558923  | 2.8446295  | 4.1169843  |
| H  | 0.3932489  | 4.8941987  | 3.7595072  |
| C  | -0.4276248 | 1.1253475  | -1.3836770 |
| C  | 0.4188637  | 2.1286136  | -1.8834215 |
| C  | -1.4487039 | 0.6219398  | -2.2018376 |
| C  | 0.2529167  | 2.6046379  | -3.1828307 |
| H  | 1.2007143  | 2.5405099  | -1.2517251 |
| C  | -1.6198276 | 1.1045146  | -3.4995552 |
| H  | -2.1068998 | -0.1528914 | -1.8160914 |

|   |            |            |            |
|---|------------|------------|------------|
| C | -0.7661563 | 2.0932258  | -3.9918035 |
| H | 0.9162016  | 3.3757324  | -3.5651608 |
| H | -2.4168990 | 0.7114610  | -4.1243669 |
| H | -0.8954207 | 2.4687247  | -5.0030247 |
| N | 1.2388806  | -0.4508652 | 0.3796063  |
| C | 2.5327703  | -0.0197066 | -0.1343125 |
| H | 2.7805067  | 0.9705146  | 0.2703584  |
| H | 3.3059247  | -0.7241678 | 0.1893620  |
| H | 2.5631668  | 0.0432868  | -1.2330773 |

**1cT** : [Fe(CO)<sub>4</sub>]PPh<sub>2</sub>NmeT complex

65

Energy = -3026.030590323

|    |            |            |            |
|----|------------|------------|------------|
| P  | -0.6315727 | 0.1929008  | 0.2281986  |
| Fe | -0.5103601 | -1.7964194 | -0.8467644 |
| C  | -0.4504475 | -3.3670223 | -1.6784345 |
| O  | -0.4103011 | -4.3888613 | -2.2186456 |
| C  | 0.9804565  | -1.3427298 | -1.7276192 |
| O  | 1.9144823  | -1.1798750 | -2.3987840 |
| C  | -0.5681414 | -2.6415041 | 0.7334857  |
| O  | -0.6479615 | -3.2566814 | 1.7128622  |
| C  | -2.1245233 | -1.4665395 | -1.5377614 |
| O  | -3.1810585 | -1.3399506 | -2.0027216 |
| N  | 0.7500808  | 0.8898950  | 0.9784517  |
| C  | -1.7936042 | 0.0237165  | 1.6329478  |
| C  | -3.1721676 | -0.0049353 | 1.3757961  |
| C  | -1.3398653 | -0.2190727 | 2.9351932  |
| C  | -4.0760508 | -0.2662830 | 2.4035798  |
| H  | -3.5408947 | 0.1788195  | 0.3716385  |
| C  | -2.2449433 | -0.4769009 | 3.9637350  |
| H  | -0.2755085 | -0.2004314 | 3.1438150  |
| C  | -3.6151448 | -0.5032854 | 3.7006503  |
| H  | -5.1411346 | -0.2821680 | 2.1911842  |
| H  | -1.8780585 | -0.6574233 | 4.9699533  |
| H  | -4.3205192 | -0.7066989 | 4.5011424  |
| C  | -1.4451812 | 1.5015878  | -0.7702534 |
| C  | -2.0780871 | 2.5924129  | -0.1524295 |
| C  | -1.3700291 | 1.4664155  | -2.1694015 |
| C  | -2.6145243 | 3.6257924  | -0.9196762 |
| H  | -2.1726516 | 2.6263595  | 0.9281289  |
| C  | -1.9065282 | 2.4979343  | -2.9360141 |
| H  | -0.8922753 | 0.6208216  | -2.6550393 |
| C  | -2.5274352 | 3.5822219  | -2.3124842 |
| H  | -3.1059871 | 4.4609191  | -0.4287415 |
| H  | -1.8437237 | 2.4535459  | -4.0194382 |
| H  | -2.9493719 | 4.3857546  | -2.9093944 |
| C  | 2.7028946  | 1.7481010  | -0.3116320 |
| C  | 3.9442902  | 1.1584349  | -1.0138871 |
| C  | 4.9172610  | 0.5154422  | -0.0323948 |
| C  | 4.1851018  | -0.6030957 | 0.6964216  |
| C  | 2.9113979  | -0.1516517 | 1.4429391  |

|   |            |            |            |
|---|------------|------------|------------|
| H | 5.7830471  | 0.1086862  | -0.5681206 |
| H | 3.6134468  | 0.4054998  | -1.7357663 |
| H | 4.4238354  | 1.9696524  | -1.5744341 |
| H | 3.8866427  | -1.3596269 | -0.0404546 |
| H | 4.8367940  | -1.0973233 | 1.4264778  |
| H | 5.3053919  | 1.2566944  | 0.6769151  |
| N | 2.0586093  | 0.6318266  | 0.4767059  |
| C | 3.1680938  | 3.0146239  | 0.4582875  |
| H | 3.9250472  | 2.7995230  | 1.2130146  |
| H | 3.6214269  | 3.6922682  | -0.2742265 |
| H | 2.3493019  | 3.5521141  | 0.9342802  |
| C | 1.7233720  | 2.2031263  | -1.3938980 |
| H | 1.3690447  | 1.3530442  | -1.9791520 |
| H | 0.8595692  | 2.7256370  | -0.9767642 |
| H | 2.2371804  | 2.8951228  | -2.0692253 |
| C | 2.1774385  | -1.4375779 | 1.8288274  |
| H | 1.8961981  | -1.9945781 | 0.9338002  |
| H | 2.8447467  | -2.0556687 | 2.4389158  |
| H | 1.2772836  | -1.2373949 | 2.4117426  |
| C | 3.2759234  | 0.5770900  | 2.7555584  |
| H | 2.3761474  | 0.8203359  | 3.3282160  |
| H | 3.8491242  | 1.4921668  | 2.6006102  |
| H | 3.8811442  | -0.0965244 | 3.3725081  |
| C | 0.4963922  | 2.1331410  | 1.7361780  |
| H | 1.3304215  | 2.3153919  | 2.4109037  |
| H | 0.3607884  | 3.0019720  | 1.0814247  |
| H | -0.4106456 | 2.0103371  | 2.3312724  |

**1c<sup>-</sup>** : [Fe(CO)<sub>4</sub>]PPh<sub>2</sub>NMe<sup>-</sup> anion complex

37

Energy = -2617.358310583

|   |            |            |            |
|---|------------|------------|------------|
| P | 0.4811268  | 0.5655875  | 0.0440327  |
| C | 0.8098681  | 2.1413995  | -0.8773545 |
| C | 1.9493340  | 0.4719915  | 1.1295510  |
| N | -0.7312882 | 0.7236072  | 1.0740896  |
| C | 0.5328295  | 3.3328745  | -0.1894791 |
| C | 1.2838120  | 2.2142476  | -2.1909630 |
| C | 1.8277320  | -0.1900071 | 2.3584726  |
| C | 3.1923351  | 0.9962256  | 0.7554819  |
| C | -2.0972449 | 0.6137904  | 0.5902630  |
| C | 0.7421876  | 4.5698400  | -0.7969772 |
| H | 0.1407131  | 3.2678988  | 0.8226556  |
| C | 1.4950280  | 3.4522441  | -2.8029306 |
| H | 1.4757178  | 1.2962715  | -2.7381539 |
| C | 2.9332688  | -0.3278583 | 3.1975684  |
| H | 0.8537168  | -0.5768043 | 2.6418706  |
| C | 4.2990801  | 0.8569066  | 1.5940670  |
| H | 3.2947979  | 1.5178814  | -0.1915493 |
| H | -2.4224422 | 1.4740939  | -0.0233034 |
| H | -2.2592810 | -0.2913605 | -0.0237036 |

|    |            |            |            |
|----|------------|------------|------------|
| H  | -2.7795743 | 0.5538348  | 1.4488544  |
| C  | 1.2274832  | 4.6322871  | -2.1070866 |
| H  | 0.5236546  | 5.4857376  | -0.2531469 |
| H  | 1.8636255  | 3.4944147  | -3.8249149 |
| C  | 4.1732829  | 0.1930561  | 2.8163604  |
| H  | 2.8286792  | -0.8406244 | 4.1505997  |
| H  | 5.2590994  | 1.2695937  | 1.2945204  |
| H  | 1.3879337  | 5.5957660  | -2.5841476 |
| H  | 5.0352543  | 0.0851498  | 3.4697078  |
| Fe | 0.4462331  | -1.2321956 | -1.4348496 |
| C  | 0.3403378  | -2.6166671 | -2.5436279 |
| C  | -0.0075247 | -2.1813134 | 0.0055098  |
| C  | -0.7873621 | -0.3018391 | -2.3168633 |
| C  | 2.1779210  | -0.9746363 | -1.7321591 |
| O  | 0.2721620  | -3.5202499 | -3.2746182 |
| O  | -0.3028301 | -2.8357116 | 0.9235394  |
| O  | -1.5830911 | 0.2885563  | -2.9353178 |
| O  | 3.3174049  | -0.8584107 | -1.9629012 |

**1c<sup>•</sup>** : [Fe(CO)<sub>4</sub>]PPh<sub>2</sub>NMe<sup>•</sup> radical complex  
37

Energy = -2617.210637749

|    |            |            |            |
|----|------------|------------|------------|
| P  | 0.6359088  | 0.4533323  | -0.1027265 |
| C  | 0.8200343  | 2.0866567  | -0.8808307 |
| C  | 1.9530255  | 0.3995921  | 1.1419233  |
| N  | -0.7589058 | 0.3542633  | 0.7868208  |
| C  | 0.8131501  | 3.2178950  | -0.0465859 |
| C  | 0.9306191  | 2.2473593  | -2.2658561 |
| C  | 1.7158293  | -0.1461175 | 2.4099675  |
| C  | 3.2331434  | 0.8616719  | 0.8056143  |
| C  | -1.9905870 | 0.9679610  | 0.3317534  |
| C  | 0.9105389  | 4.4915949  | -0.5990337 |
| H  | 0.7373012  | 3.0963164  | 1.0305970  |
| C  | 1.0345098  | 3.5258489  | -2.8156773 |
| H  | 0.9437205  | 1.3738548  | -2.9097204 |
| C  | 2.7566433  | -0.2236970 | 3.3352614  |
| H  | 0.7210104  | -0.4953898 | 2.6644049  |
| C  | 4.2682952  | 0.7801675  | 1.7346964  |
| H  | 3.4184850  | 1.2911946  | -0.1745724 |
| H  | -1.8743868 | 1.6955994  | -0.4810674 |
| H  | -2.6917460 | 0.1844089  | 0.0130087  |
| H  | -2.4542534 | 1.4636198  | 1.1945478  |
| C  | 1.0224477  | 4.6461431  | -1.9844405 |
| H  | 0.9030843  | 5.3632492  | 0.0486299  |
| H  | 1.1244008  | 3.6446252  | -3.8912449 |
| C  | 4.0316790  | 0.2358695  | 2.9995460  |
| H  | 2.5699802  | -0.6424109 | 4.3198806  |
| H  | 5.2570749  | 1.1451766  | 1.4730711  |
| H  | 1.1021160  | 5.6407810  | -2.4132439 |
| H  | 4.8396270  | 0.1733242  | 3.7227208  |
| Fe | 0.5554674  | -1.3260111 | -1.4726738 |

|   |            |            |            |
|---|------------|------------|------------|
| C | 0.3814738  | -2.7766038 | -2.5090714 |
| C | 0.5220287  | -2.3569215 | 0.0075265  |
| C | -0.8100915 | -0.5429023 | -2.3430258 |
| C | 2.2063844  | -0.9408487 | -2.0341088 |
| O | 0.2743593  | -3.7095966 | -3.1803337 |
| O | 0.5106749  | -3.0536493 | 0.9309030  |
| O | -1.6966919 | -0.0710606 | -2.9217887 |
| O | 3.2776302  | -0.7097186 | -2.4117752 |

**1de<sub>ts</sub>** : 1,2-Fe-shift of [Fe(CO)<sub>4</sub>]PPh<sub>2</sub>PMe<sup>•</sup>  
37

Energy = -2903.827471961

|    |            |            |            |
|----|------------|------------|------------|
| P  | -0.1808392 | 0.5552779  | 0.1952993  |
| Fe | -0.1716337 | -2.1961693 | 0.3344218  |
| C  | 0.7237594  | -3.7674561 | 0.3523572  |
| O  | 1.2938588  | -4.7709409 | 0.3639274  |
| C  | -0.0501614 | -2.0283548 | -1.4690291 |
| O  | 0.0611759  | -2.0560095 | -2.6177738 |
| C  | -0.1470865 | -1.9977925 | 2.1461885  |
| O  | -0.1083748 | -1.9173587 | 3.2946717  |
| C  | -1.9007017 | -2.6842268 | 0.2802997  |
| O  | -3.0095803 | -3.0007920 | 0.2329340  |
| C  | -0.0519523 | 2.0855885  | 1.1972556  |
| C  | -0.2728545 | 3.3622959  | 0.6596553  |
| C  | 0.1992674  | 1.9573710  | 2.5741901  |
| C  | -0.2316778 | 4.4879648  | 1.4846930  |
| H  | -0.4808092 | 3.4795512  | -0.3991533 |
| C  | 0.2478525  | 3.0844434  | 3.3907777  |
| H  | 0.3714779  | 0.9743306  | 3.0049260  |
| C  | 0.0298096  | 4.3547859  | 2.8490629  |
| H  | -0.4001547 | 5.4716903  | 1.0550207  |
| H  | 0.4502511  | 2.9713692  | 4.4522180  |
| H  | 0.0620471  | 5.2328629  | 3.4875065  |
| C  | -0.4256173 | 1.1087011  | -1.5194594 |
| C  | 0.5610999  | 1.8012953  | -2.2398284 |
| C  | -1.6565830 | 0.8305212  | -2.1318583 |
| C  | 0.3168498  | 2.2066772  | -3.5507956 |
| H  | 1.5119070  | 2.0328378  | -1.7700603 |
| C  | -1.8975908 | 1.2366542  | -3.4439284 |
| H  | -2.4209710 | 0.2937312  | -1.5767458 |
| C  | -0.9108103 | 1.9224363  | -4.1543696 |
| H  | 1.0839385  | 2.7435869  | -4.1013955 |
| H  | -2.8533482 | 1.0169558  | -3.9106344 |
| H  | -1.0974313 | 2.2363991  | -5.1773299 |
| P  | 1.6345058  | -0.6197053 | 0.4744127  |
| C  | 2.6105064  | -0.5709841 | -1.1137591 |
| H  | 3.3188077  | 0.2606975  | -1.0429860 |
| H  | 3.1802006  | -1.5043227 | -1.1715470 |
| H  | 2.0092555  | -0.4595543 | -2.0174557 |

**1de<sup>•</sup>** : PPh<sub>2</sub>PMe[Fe(CO)<sub>4</sub>]<sup>•</sup> radical complex

37

Energy = -2903.838195493

|    |            |            |            |
|----|------------|------------|------------|
| P  | 1.3681311  | 0.3569674  | 1.5603588  |
| Fe | -1.8752212 | -0.7377651 | -0.3685271 |
| C  | -0.4106548 | -1.2447771 | -1.3213919 |
| O  | 0.4457942  | -1.5682281 | -2.0228827 |
| C  | -2.0497262 | 1.0352837  | -0.5834391 |
| O  | -2.2065344 | 2.1733378  | -0.6911430 |
| C  | -2.8733164 | -1.3213828 | -1.7438946 |
| O  | -3.5208681 | -1.6828044 | -2.6281217 |
| C  | -3.2235637 | -1.1596057 | 0.7575236  |
| O  | -4.1096192 | -1.4247613 | 1.4496839  |
| C  | 2.3474873  | -0.8784571 | 0.6333746  |
| C  | 3.4767975  | -0.4775617 | -0.1000072 |
| C  | 2.0853225  | -2.2507192 | 0.7735142  |
| C  | 4.3001812  | -1.4259982 | -0.7051182 |
| H  | 3.7121611  | 0.5779752  | -0.2013666 |
| C  | 2.9109008  | -3.1960914 | 0.1677603  |
| H  | 1.2225709  | -2.5792782 | 1.3479924  |
| C  | 4.0180345  | -2.7878277 | -0.5784764 |
| H  | 5.1641764  | -1.0985797 | -1.2767472 |
| H  | 2.6842174  | -4.2531995 | 0.2747696  |
| H  | 4.6578370  | -3.5248036 | -1.0552107 |
| C  | 1.2007223  | 1.7856468  | 0.4244352  |
| C  | 1.2923747  | 1.7128808  | -0.9745972 |
| C  | 0.9070483  | 3.0213284  | 1.0247458  |
| C  | 1.0943995  | 2.8512093  | -1.7517198 |
| H  | 1.5253363  | 0.7692236  | -1.4546510 |
| C  | 0.6938101  | 4.1563626  | 0.2427187  |
| H  | 0.8481891  | 3.0900143  | 2.1083493  |
| C  | 0.7883844  | 4.0736288  | -1.1471194 |
| H  | 1.1709084  | 2.7834053  | -2.8333112 |
| H  | 0.4619350  | 5.1044316  | 0.7195444  |
| H  | 0.6276813  | 4.9573027  | -1.7579054 |
| P  | -0.6548754 | -0.5281816 | 1.5052012  |
| C  | -1.4523759 | 0.5216371  | 2.8024442  |
| H  | -2.4570755 | 0.1473429  | 3.0125097  |
| H  | -0.8518684 | 0.4815726  | 3.7150592  |
| H  | -1.5273272 | 1.5619381  | 2.4681093  |

**1dT** : [Fe(CO)<sub>4</sub>]PPh<sub>2</sub>PMeT complex

65

Energy = -3312.694343693

|    |            |            |            |
|----|------------|------------|------------|
| P  | -0.9205136 | -0.0202310 | -0.2515613 |
| Fe | -0.8161489 | -1.1434593 | 1.7193820  |
| C  | 0.6323428  | -0.2265643 | 2.2273133  |
| O  | 1.5560879  | 0.3318954  | 2.6582927  |
| C  | -0.6630408 | -2.6677032 | 0.7928817  |
| O  | -0.5853832 | -3.6879670 | 0.2453101  |
| C  | -0.8005312 | -2.0242180 | 3.2642495  |
| O  | -0.7939508 | -2.5956774 | 4.2703436  |

|   |            |            |            |
|---|------------|------------|------------|
| C | -2.4655305 | -0.5336837 | 2.0293319  |
| O | -3.5417812 | -0.1588211 | 2.2542745  |
| P | 0.8944208  | -0.3735628 | -1.5723374 |
| C | -1.4549548 | 1.7211189  | -0.1223008 |
| C | -1.8734293 | 2.4276066  | -1.2632071 |
| C | -1.3737704 | 2.3934641  | 1.1039370  |
| C | -2.1936473 | 3.7803217  | -1.1740933 |
| H | -1.9674897 | 1.9162489  | -2.2150788 |
| C | -1.6952084 | 3.7471780  | 1.1901238  |
| H | -1.0649680 | 1.8478768  | 1.9903429  |
| C | -2.1005565 | 4.4449744  | 0.0514779  |
| H | -2.5197057 | 4.3147925  | -2.0617638 |
| H | -1.6322138 | 4.2548790  | 2.1482588  |
| H | -2.3514342 | 5.4996467  | 0.1186739  |
| C | -2.2022364 | -0.7480534 | -1.3450252 |
| C | -1.9145622 | -1.8357071 | -2.1841905 |
| C | -3.5229010 | -0.2755402 | -1.2746936 |
| C | -2.9203958 | -2.4183377 | -2.9548778 |
| H | -0.9040492 | -2.2282891 | -2.2329828 |
| C | -4.5264084 | -0.8668452 | -2.0392850 |
| H | -3.7679542 | 0.5542425  | -0.6202682 |
| C | -4.2280117 | -1.9363996 | -2.8864520 |
| H | -2.6793254 | -3.2536834 | -3.6060426 |
| H | -5.5433278 | -0.4909490 | -1.9712498 |
| H | -5.0109496 | -2.3939144 | -3.4843898 |
| C | 3.3301464  | -1.0758410 | -0.7240609 |
| C | 4.3936469  | -0.7956264 | 0.3535314  |
| C | 5.0410246  | 0.5761390  | 0.2434085  |
| C | 3.9383814  | 1.6149622  | 0.3812624  |
| C | 2.8508851  | 1.5050330  | -0.7078938 |
| H | 5.7865000  | 0.7070800  | 1.0361308  |
| H | 3.9154239  | -0.8806189 | 1.3377323  |
| H | 5.1389747  | -1.5962798 | 0.2832897  |
| H | 3.4626445  | 1.4957040  | 1.3612773  |
| H | 4.3394622  | 2.6342586  | 0.3324726  |
| H | 5.5711373  | 0.6855457  | -0.7108749 |
| N | 2.3387528  | 0.0849900  | -0.8120126 |
| C | 3.9872461  | -1.3356847 | -2.0918777 |
| H | 3.2106663  | -1.5013839 | -2.8479315 |
| H | 4.6165052  | -0.5053106 | -2.4191229 |
| H | 4.6105996  | -2.2355164 | -2.0398088 |
| C | 2.6149817  | -2.3630323 | -0.2810956 |
| H | 2.0088047  | -2.1749144 | 0.6092931  |
| H | 1.9713500  | -2.7758124 | -1.0602439 |
| H | 3.3786874  | -3.1098448 | -0.0358956 |
| C | 1.7120426  | 2.4222570  | -0.2610826 |
| H | 0.9057736  | 2.4956065  | -0.9911623 |
| H | 1.2938439  | 2.0737824  | 0.6842625  |
| H | 2.1105698  | 3.4303325  | -0.1066512 |
| C | 3.4297135  | 2.0235169  | -2.0414710 |
| H | 2.7073907  | 1.9428559  | -2.8542802 |

|   |            |           |            |
|---|------------|-----------|------------|
| H | 4.3323922  | 1.4827921 | -2.3332944 |
| H | 3.6953453  | 3.0803888 | -1.9266390 |
| C | 0.4903490  | 0.7568645 | -2.9798906 |
| H | 1.2332104  | 0.5831130 | -3.7645736 |
| H | -0.4823806 | 0.4240656 | -3.3582290 |
| H | 0.4377542  | 1.8244148 | -2.7586682 |

**1d<sup>-</sup>** : [Fe(CO)<sub>4</sub>]PPh<sub>2</sub>PMe<sup>-</sup> anion complex  
37

Energy = -2903.975270991

|    |            |            |            |
|----|------------|------------|------------|
| P  | 0.5232667  | 0.6034041  | 0.1272442  |
| C  | 0.8395951  | 2.1528566  | -0.8433792 |
| C  | 2.0386677  | 0.4951457  | 1.1584288  |
| P  | -0.9820943 | 0.8627751  | 1.5996132  |
| C  | 0.5339529  | 3.3848706  | -0.2497890 |
| C  | 1.3807025  | 2.1391927  | -2.1343808 |
| C  | 2.0825455  | -0.4720568 | 2.1745949  |
| C  | 3.1570808  | 1.3103520  | 0.9470490  |
| C  | -2.4937803 | 0.6567644  | 0.4953479  |
| C  | 0.7789840  | 4.5794786  | -0.9260810 |
| H  | 0.0869097  | 3.3804653  | 0.7428652  |
| C  | 1.6223066  | 3.3338533  | -2.8153165 |
| H  | 1.5990078  | 1.1887802  | -2.6108445 |
| C  | 3.2196801  | -0.6119802 | 2.9681175  |
| H  | 1.2135839  | -1.1018736 | 2.3410496  |
| C  | 4.2967131  | 1.1669142  | 1.7410784  |
| H  | 3.1389271  | 2.0587680  | 0.1612304  |
| H  | -2.6275144 | 1.4766255  | -0.2189855 |
| H  | -2.4536191 | -0.2874029 | -0.0607426 |
| H  | -3.3697326 | 0.6325009  | 1.1542233  |
| C  | 1.3248397  | 4.5572956  | -2.2124433 |
| H  | 0.5367959  | 5.5279153  | -0.4529136 |
| H  | 2.0385963  | 3.3072892  | -3.8191726 |
| C  | 4.3318661  | 0.2073277  | 2.7535335  |
| H  | 3.2392470  | -1.3625264 | 3.7541208  |
| H  | 5.1568823  | 1.8083274  | 1.5675179  |
| H  | 1.5075275  | 5.4870923  | -2.7449832 |
| H  | 5.2195921  | 0.0961125  | 3.3705474  |
| Fe | 0.3852116  | -1.2125213 | -1.3293352 |
| C  | 0.2891050  | -2.5598267 | -2.4786568 |
| C  | -0.2026031 | -2.1922906 | 0.0466585  |
| C  | -0.7848813 | -0.2406231 | -2.2589558 |
| C  | 2.1485061  | -1.0644923 | -1.5208741 |
| O  | 0.2319579  | -3.4381830 | -3.2387030 |
| O  | -0.5824215 | -2.8873171 | 0.8990117  |
| O  | -1.5360781 | 0.3717089  | -2.9074573 |
| O  | 3.3046544  | -1.0091443 | -1.6661210 |

**1d<sup>•</sup>** : [Fe(CO)<sub>4</sub>]PPh<sub>2</sub>PMe<sup>•</sup> radical complex  
37

Energy = -2903.843078068

|    |            |            |            |
|----|------------|------------|------------|
| P  | 0.6534814  | 0.4384527  | -0.0158256 |
| C  | 0.8176325  | 2.0625338  | -0.8239603 |
| C  | 2.0370180  | 0.3915969  | 1.1718952  |
| P  | -1.0901161 | 0.5991166  | 1.3133487  |
| C  | 0.8683780  | 3.2162425  | -0.0228397 |
| C  | 0.8552325  | 2.1821050  | -2.2165096 |
| C  | 1.9149436  | -0.3240642 | 2.3713778  |
| C  | 3.2520413  | 1.0169909  | 0.8593555  |
| C  | -2.3448465 | 1.2271898  | 0.1070992  |
| C  | 0.9579958  | 4.4718077  | -0.6158414 |
| H  | 0.8425884  | 3.1260841  | 1.0597698  |
| C  | 0.9461362  | 3.4440468  | -2.8069509 |
| H  | 0.8250095  | 1.2893827  | -2.8328158 |
| C  | 2.9945163  | -0.4069990 | 3.2491249  |
| H  | 0.9791957  | -0.8134909 | 2.6252964  |
| C  | 4.3293526  | 0.9287886  | 1.7398228  |
| H  | 3.3554475  | 1.5739778  | -0.0664673 |
| H  | -1.9340261 | 1.9881702  | -0.5627368 |
| H  | -2.7502002 | 0.4054137  | -0.4908622 |
| H  | -3.1604662 | 1.6614441  | 0.6926239  |
| C  | 0.9970804  | 4.5869490  | -2.0093477 |
| H  | 0.9962767  | 5.3605690  | 0.0069526  |
| H  | 0.9778741  | 3.5306817  | -3.8888526 |
| C  | 4.2030967  | 0.2181946  | 2.9350250  |
| H  | 2.8895792  | -0.9583884 | 4.1787393  |
| H  | 5.2671478  | 1.4166898  | 1.4910032  |
| H  | 1.0697544  | 5.5678364  | -2.4697725 |
| H  | 5.0428179  | 0.1534669  | 3.6206522  |
| Fe | 0.5787570  | -1.3700013 | -1.3739642 |
| C  | 0.5714910  | -2.8028547 | -2.4373825 |
| C  | 0.4049885  | -2.4052025 | 0.0821735  |
| C  | -0.8353865 | -0.7014882 | -2.2473363 |
| C  | 2.2327477  | -0.9249123 | -1.8836459 |
| O  | 0.5737326  | -3.7290093 | -3.1278211 |
| O  | 0.3057184  | -3.1150251 | 0.9938620  |
| O  | -1.7374544 | -0.3105722 | -2.8652228 |
| O  | 3.3064452  | -0.6501455 | -2.2268702 |

**2a<sup>••</sup>** : PcO[Fe(CO)<sub>4</sub>]<sup>••</sup> radical with CO in ring  
27

Energy = -2402.308304082

|   |           |            |            |
|---|-----------|------------|------------|
| N | 3.8796459 | -0.7305673 | 1.5522905  |
| C | 4.5331763 | -0.6938906 | 0.2324395  |
| C | 4.6083903 | -2.1566908 | -0.2243782 |
| H | 5.5292048 | -0.2528087 | 0.3314364  |
| H | 3.9476386 | -0.0878832 | -0.4722601 |
| H | 4.5469431 | -2.2374015 | -1.3131912 |
| H | 5.5354043 | -2.6363224 | 0.1158503  |
| N | 3.4461123 | -2.8173838 | 0.3963752  |
| C | 3.7045221 | 0.5231413  | 2.2857947  |
| H | 3.1886256 | 0.3177183  | 3.2277309  |



|    |            |            |            |
|----|------------|------------|------------|
| H  | 4.6864816  | 0.9483895  | 2.5128643  |
| H  | 3.1210152  | 1.2523626  | 1.7090028  |
| C  | 3.1172114  | -4.1968733 | 0.0477081  |
| H  | 2.2698290  | -4.5309120 | 0.6514173  |
| H  | 2.8451319  | -4.2635102 | -1.0106163 |
| H  | 3.9685451  | -4.8593841 | 0.2439540  |
| P  | 2.8344384  | -2.0081353 | 1.6872955  |
| Fe | 0.9760274  | -1.9641195 | 3.6674839  |
| C  | 1.2827574  | -2.3836939 | 5.4308398  |
| O  | 1.3982921  | -2.6243989 | 6.5524934  |
| C  | 1.0099546  | -1.5173152 | 1.7644167  |
| O  | 0.3256024  | -1.0725028 | 0.8795835  |
| C  | -0.4646869 | -2.9935988 | 3.4087118  |
| O  | -1.4403303 | -3.5909721 | 3.2286695  |
| C  | 0.1261947  | -0.4395591 | 3.9851039  |
| O  | -0.4758648 | 0.5365812  | 4.1570121  |
| O  | 2.8030819  | -2.6879170 | 3.0712547  |

**2ae<sub>ts</sub>** : P-to-O 1,2-Fe-shift of [Fe(CO)<sub>4</sub>]PcO<sup>•</sup>  
27

Energy = -2402.308477915

|    |            |            |            |
|----|------------|------------|------------|
| N  | 2.0815301  | 0.3660482  | 1.1566769  |
| C  | 3.5163516  | 0.5911205  | 0.9003579  |
| C  | 3.6543722  | 0.5877328  | -0.6252171 |
| H  | 4.1146690  | -0.2074667 | 1.3581728  |
| H  | 3.8170587  | 1.5510027  | 1.3286801  |
| H  | 3.4786174  | 1.5878241  | -1.0446174 |
| H  | 4.6421585  | 0.2405174  | -0.9412967 |
| N  | 2.6304237  | -0.3610733 | -1.0912211 |
| C  | 1.5568075  | 0.5231935  | 2.5068920  |
| H  | 0.4724837  | 0.3797477  | 2.4827285  |
| H  | 1.9956406  | -0.2103582 | 3.1938086  |
| H  | 1.7712319  | 1.5333013  | 2.8700146  |
| C  | 2.5312665  | -0.6467619 | -2.5226669 |
| H  | 1.7493584  | -1.3922711 | -2.6847478 |
| H  | 2.2965953  | 0.2570043  | -3.0990813 |
| H  | 3.4838047  | -1.0576724 | -2.8690084 |
| P  | 1.3133114  | -0.3966112 | -0.0851408 |
| Fe | -1.1972111 | -0.3312081 | 0.1691371  |
| C  | -1.6058990 | -1.2143490 | 1.7308613  |
| O  | -1.8943933 | -1.7288076 | 2.7213177  |
| C  | -0.1589328 | 0.6821795  | -0.9503869 |
| O  | 0.0908000  | 1.5632521  | -1.7169430 |
| C  | -2.3765348 | -1.0193435 | -1.0036568 |
| O  | -3.1628814 | -1.3820949 | -1.7681740 |
| C  | -2.0753920 | 1.1260397  | 0.6477507  |
| O  | -2.6834876 | 2.0693022  | 0.9328376  |
| O  | 0.6204990  | -1.7431557 | 0.0295592  |

**2ae<sup>•</sup>** : PcO[Fe(CO)<sub>4</sub>]<sup>•</sup> radical with N in ring  
27

Energy = -2402.306292750

|    |            |            |            |
|----|------------|------------|------------|
| N  | 2.2140651  | -1.5092997 | 0.2882614  |
| C  | 3.0777144  | -0.8900292 | 1.2957733  |
| C  | 1.5512227  | -2.7631413 | 0.6226393  |
| P  | 1.5517966  | -0.4429170 | -0.8694189 |
| C  | 3.7108497  | 0.2830834  | 0.5594293  |
| H  | 3.8316756  | -1.6086963 | 1.6349362  |
| H  | 2.5172804  | -0.5477106 | 2.1806117  |
| H  | 2.2970578  | -3.5206933 | 0.8903786  |
| H  | 0.8482818  | -2.6566650 | 1.4622027  |
| H  | 0.9913276  | -3.1173245 | -0.2483416 |
| N  | 2.6332173  | 0.8128853  | -0.2918456 |
| O  | 0.1185321  | 0.0997847  | -0.4143270 |
| H  | 4.0619288  | 1.0696079  | 1.2369060  |
| H  | 4.5568746  | -0.0479422 | -0.0590123 |
| C  | 3.0389644  | 1.8711494  | -1.2222369 |
| H  | 3.3782499  | 2.7411756  | -0.6501200 |
| H  | 3.8568589  | 1.5389294  | -1.8746958 |
| H  | 2.1844339  | 2.1617159  | -1.8378926 |
| Fe | -0.3671898 | 1.1626246  | 1.1184673  |
| C  | -2.0773717 | 0.6293222  | 0.7261280  |
| C  | 1.3524488  | 1.9571956  | 1.2530312  |
| C  | -0.9830280 | 2.6167646  | 1.9617436  |
| C  | -0.1720096 | 0.0971230  | 2.5841014  |
| O  | -3.1496997 | 0.2835276  | 0.5115890  |
| O  | 2.1353320  | 2.6833193  | 1.7050149  |
| O  | -1.3754001 | 3.5541567  | 2.5090222  |
| O  | -0.0731351 | -0.5641126 | 3.5220655  |

**2aT** : [Fe(CO)<sub>4</sub>]PcOT complex  
55

Energy = -2811.122444815

|    |            |            |            |
|----|------------|------------|------------|
| N  | 2.5634725  | 0.2080632  | 0.3404766  |
| C  | 3.5267031  | -0.2465694 | -0.6731935 |
| C  | 2.6743848  | -0.9320659 | -1.7405453 |
| H  | 4.2520880  | -0.9441100 | -0.2359858 |
| H  | 4.0598772  | 0.6180374  | -1.0767451 |
| H  | 2.3098241  | -0.2055623 | -2.4827517 |
| H  | 3.2329914  | -1.7160534 | -2.2640814 |
| N  | 1.5430688  | -1.5224224 | -1.0160681 |
| C  | 2.7558458  | 1.5006162  | 0.9804475  |
| H  | 1.8565350  | 1.7670516  | 1.5375018  |
| H  | 3.6099700  | 1.4931746  | 1.6675338  |
| H  | 2.9252286  | 2.2652927  | 0.2129207  |
| C  | 0.4970460  | -2.1097677 | -1.8444537 |
| H  | -0.3123156 | -2.4918020 | -1.2231231 |
| H  | 0.0818015  | -1.3688135 | -2.5427268 |
| H  | 0.9109732  | -2.9444825 | -2.4205563 |
| P  | 1.2584530  | -0.8105363 | 0.4745642  |
| Fe | -0.7216225 | 0.0832856  | 0.9424230  |
| C  | -0.1133215 | 0.5211748  | 2.5621913  |

|   |            |            |            |
|---|------------|------------|------------|
| O | 0.2420220  | 0.7948864  | 3.6339787  |
| C | -2.2964472 | 0.8781743  | 1.2306949  |
| O | -3.3139391 | 1.3948695  | 1.4160152  |
| C | -1.4498050 | -1.5462993 | 0.8920959  |
| O | -1.9511147 | -2.5942720 | 0.8957121  |
| C | -0.4440382 | 1.0674938  | -0.5254693 |
| O | -0.2540447 | 1.7031581  | -1.4794779 |
| O | 1.4107797  | -1.9481790 | 1.6496324  |
| C | 3.2379687  | -2.3332877 | 3.1453555  |
| C | 2.3594900  | -4.1613864 | 1.5757368  |
| C | 4.5069875  | -3.1844872 | 3.3603357  |
| C | 3.6584571  | -4.9509878 | 1.8469190  |
| C | 4.2508527  | -4.6810341 | 3.2252361  |
| H | 4.9053234  | -2.9333373 | 4.3502954  |
| H | 5.2558838  | -2.8782407 | 2.6180881  |
| H | 3.4270842  | -6.0139703 | 1.7120153  |
| H | 4.3927325  | -4.6754372 | 1.0784608  |
| H | 5.1866879  | -5.2377903 | 3.3498712  |
| H | 3.5708254  | -5.0286137 | 4.0121531  |
| N | 2.7025510  | -2.7119813 | 1.7895363  |
| C | 2.2549332  | -2.4851482 | 4.3245931  |
| H | 2.6347880  | -1.9016505 | 5.1700070  |
| H | 1.2724180  | -2.0925236 | 4.0545999  |
| H | 2.1442141  | -3.5174960 | 4.6584403  |
| C | 3.6716163  | -0.8665160 | 3.0848942  |
| H | 4.2976199  | -0.6874240 | 2.2074951  |
| H | 2.8075706  | -0.2005443 | 3.0541728  |
| H | 4.2474164  | -0.6294297 | 3.9857246  |
| C | 1.1860854  | -4.7041655 | 2.4168754  |
| H | 0.8460858  | -5.6450341 | 1.9711003  |
| H | 1.4595051  | -4.9082117 | 3.4525999  |
| H | 0.3512181  | -3.9997715 | 2.4034860  |
| C | 2.0037257  | -4.3627501 | 0.0991986  |
| H | 1.0126902  | -3.9656469 | -0.1236897 |
| H | 2.7364009  | -3.8748769 | -0.5474249 |
| H | 1.9927490  | -5.4372320 | -0.1139102 |

**2a<sup>-</sup>** : [Fe(CO)<sub>4</sub>]PcO<sup>-</sup> anion complex  
27

Energy = -2402.493068467

|   |           |            |            |
|---|-----------|------------|------------|
| N | 2.1650947 | 0.8680597  | 0.1129164  |
| C | 3.0957255 | 0.4799169  | -0.9483026 |
| C | 2.3046278 | -0.5038046 | -1.8008330 |
| H | 4.0038028 | -0.0016276 | -0.5429379 |
| H | 3.4011704 | 1.3633210  | -1.5218112 |
| H | 1.6264889 | 0.0334393  | -2.4830860 |
| H | 2.9642425 | -1.1434736 | -2.4008160 |
| N | 1.5688560 | -1.3177981 | -0.8327957 |
| C | 2.7107758 | 1.7509397  | 1.1350783  |
| H | 1.9299475 | 2.0109595  | 1.8525214  |
| H | 3.5484331 | 1.2926552  | 1.6862150  |

|    |            |            |            |
|----|------------|------------|------------|
| H  | 3.0673466  | 2.6748061  | 0.6640063  |
| C  | 0.6596633  | -2.3073816 | -1.3919071 |
| H  | 0.2701528  | -2.9459663 | -0.5965889 |
| H  | -0.1925978 | -1.8506203 | -1.9209395 |
| H  | 1.2108775  | -2.9397736 | -2.0980940 |
| P  | 1.1874366  | -0.4566459 | 0.6030642  |
| Fe | -1.0222415 | 0.1774380  | 0.7649471  |
| C  | -0.5448889 | 1.0727494  | 2.2227352  |
| O  | -0.2979899 | 1.6539397  | 3.2057612  |
| C  | -0.7963888 | 0.8630891  | -0.8619959 |
| O  | -0.6662202 | 1.3182415  | -1.9291163 |
| C  | -1.3837703 | -1.5391605 | 1.0509116  |
| O  | -1.6673148 | -2.6505408 | 1.2706733  |
| C  | -2.7267163 | 0.6814386  | 0.8401909  |
| O  | -3.8413653 | 1.0134836  | 0.8869963  |
| O  | 1.6882771  | -1.1774720 | 1.8332938  |

**2a<sup>•</sup>** : [Fe(CO)<sub>4</sub>]PcO<sup>•</sup> radical complex  
27

Energy = -2402.336354476

|    |            |            |            |
|----|------------|------------|------------|
| N  | 2.1477959  | 0.8349291  | 0.1980465  |
| C  | 2.9618968  | 0.6607610  | -1.0109941 |
| C  | 2.2558555  | -0.4180577 | -1.8368322 |
| H  | 3.9761024  | 0.3389264  | -0.7300773 |
| H  | 3.0373504  | 1.6059261  | -1.5577791 |
| H  | 1.5186973  | 0.0249496  | -2.5212727 |
| H  | 2.9727679  | -0.9903718 | -2.4352152 |
| N  | 1.6248182  | -1.2990161 | -0.8531738 |
| C  | 2.6375958  | 1.7691502  | 1.2041227  |
| H  | 1.9877419  | 1.7472403  | 2.0807446  |
| H  | 3.6562706  | 1.5059157  | 1.5209607  |
| H  | 2.6444113  | 2.7861648  | 0.7983362  |
| C  | 0.9062088  | -2.4745653 | -1.3305442 |
| H  | 0.5306046  | -3.0391477 | -0.4734184 |
| H  | 0.0621309  | -2.2136113 | -1.9857454 |
| H  | 1.5930997  | -3.1174787 | -1.8907399 |
| P  | 1.2145247  | -0.5226786 | 0.5833615  |
| Fe | -0.9223363 | 0.3492313  | 0.7188396  |
| C  | -0.4330784 | 0.6825117  | 2.4453567  |
| O  | -0.2017848 | 0.8753088  | 3.5554654  |
| C  | -0.9278656 | 0.4187390  | -1.0980405 |
| O  | -0.9808229 | 0.4437592  | -2.2481129 |
| C  | -1.6522876 | -1.2791654 | 0.9526174  |
| O  | -2.1095980 | -2.3265080 | 1.0999528  |
| C  | -2.4245876 | 1.3669564  | 0.8548490  |
| O  | -3.3813856 | 1.9998087  | 0.9469446  |
| O  | 1.5692989  | -1.3094650 | 1.8124351  |

**2be\_ts** : P-to-S 1,2-Fe-shift of [Fe(CO)<sub>4</sub>]PcS<sup>•</sup>  
27

Energy = -2725.272294898

|    |            |            |            |
|----|------------|------------|------------|
| N  | 2.0282321  | 0.3408584  | 1.4106722  |
| C  | 3.4313278  | -0.0939359 | 1.4765845  |
| C  | 3.9718179  | 0.1975596  | 0.0819278  |
| H  | 3.5071794  | -1.1659262 | 1.7148171  |
| H  | 3.9513380  | 0.4796947  | 2.2494046  |
| H  | 4.2259373  | 1.2639339  | -0.0262252 |
| H  | 4.8604849  | -0.4005125 | -0.1477417 |
| N  | 2.8771630  | -0.1944744 | -0.8112369 |
| C  | 1.2856656  | 0.4679682  | 2.6540275  |
| H  | 0.3202923  | 0.9374152  | 2.4516398  |
| H  | 1.1125349  | -0.5030011 | 3.1386690  |
| H  | 1.8462996  | 1.1102381  | 3.3412926  |
| C  | 3.0733832  | -0.0146549 | -2.2469148 |
| H  | 2.1799599  | -0.3554466 | -2.7769148 |
| H  | 3.2709477  | 1.0339258  | -2.5148108 |
| H  | 3.9218985  | -0.6256195 | -2.5721236 |
| P  | 1.3369040  | 0.0988824  | -0.1098935 |
| Fe | -1.4263173 | 0.0663713  | -0.1823341 |
| C  | -1.5487696 | -0.6581230 | 1.4728445  |
| O  | -1.6584037 | -1.1692238 | 2.4991534  |
| C  | -0.9862139 | 0.5917463  | -1.8706864 |
| O  | -0.7132616 | 0.8864452  | -2.9480010 |
| C  | -2.9994973 | -0.6627624 | -0.6931190 |
| O  | -4.0375444 | -1.0585088 | -1.0046378 |
| C  | -1.8211174 | 1.7244561  | 0.3594793  |
| O  | -2.1084623 | 2.7882635  | 0.7062531  |
| S  | 0.2548487  | -1.6457574 | -0.4562237 |

**2be<sup>•</sup>** : PcS[Fe(CO)<sub>4</sub>]<sup>•</sup> radical complex

27

Energy = -2725.284811699

|    |            |            |            |
|----|------------|------------|------------|
| N  | 2.0285065  | -1.4960827 | -0.1751908 |
| C  | 2.6030869  | -1.0335939 | 1.0844788  |
| C  | 1.1231309  | -2.6399661 | -0.1101413 |
| P  | 1.6765208  | -0.1722752 | -1.1954249 |
| C  | 3.5401838  | 0.0983770  | 0.6887470  |
| H  | 3.1110538  | -1.8505443 | 1.6050830  |
| H  | 1.7927692  | -0.6437935 | 1.7410747  |
| H  | 1.6679459  | -3.5062775 | 0.2775609  |
| H  | 0.2629959  | -2.4398184 | 0.5432512  |
| H  | 0.7542016  | -2.8686587 | -1.1127113 |
| N  | 2.8595668  | 0.7747620  | -0.4241209 |
| S  | -0.2537276 | 0.5681205  | -0.5302199 |
| H  | 3.7091835  | 0.7936043  | 1.5198785  |
| H  | 4.5136255  | -0.2937987 | 0.3582414  |
| C  | 3.6164270  | 1.7828837  | -1.1594158 |
| H  | 3.8399745  | 2.6325064  | -0.5050992 |
| H  | 4.5627922  | 1.3748754  | -1.5435204 |
| H  | 3.0206180  | 2.1450768  | -2.0006404 |
| Fe | -0.1221277 | 1.1277746  | 1.7031552  |
| C  | -1.1909971 | -0.3351227 | 1.8576025  |

|   |            |            |           |
|---|------------|------------|-----------|
| C | 1.1095290  | 2.3964181  | 1.2112951 |
| C | -1.4596322 | 2.3285632  | 1.9201787 |
| C | 0.5031321  | 1.0238142  | 3.3821328 |
| O | -1.9021204 | -1.2344576 | 1.9562830 |
| O | 1.7651687  | 3.3084317  | 0.9666584 |
| O | -2.3148011 | 3.0855866  | 2.0683262 |
| O | 0.8932716  | 0.9674289  | 4.4669485 |

**2bT** : [Fe(CO)<sub>4</sub>]PcST complex

55

Energy = -3134.120363150

|    |            |            |            |
|----|------------|------------|------------|
| P  | 1.0949025  | -0.6117818 | 0.3720105  |
| S  | 0.9917286  | -2.0053291 | 1.9921996  |
| Fe | -0.8812091 | 0.4050041  | 0.5873732  |
| N  | 2.4420514  | 0.3679409  | 0.3062257  |
| C  | 3.4642116  | -0.1182092 | -0.6299502 |
| C  | 2.6708947  | -0.8364134 | -1.7181091 |
| H  | 4.1704875  | -0.7982830 | -0.1355871 |
| H  | 4.0170001  | 0.7364346  | -1.0298632 |
| H  | 2.3157564  | -0.1246907 | -2.4785463 |
| H  | 3.2640090  | -1.6131431 | -2.2118778 |
| N  | 1.5402633  | -1.4559376 | -1.0148064 |
| C  | 2.6828163  | 1.5763061  | 1.0794951  |
| H  | 1.7529459  | 1.8908316  | 1.5552647  |
| H  | 3.4457902  | 1.4288705  | 1.8521677  |
| H  | 3.0121369  | 2.3736699  | 0.4034615  |
| C  | 0.5588942  | -2.1593039 | -1.8330490 |
| H  | -0.1770801 | -2.6454278 | -1.1926042 |
| H  | 0.0368031  | -1.4785500 | -2.5204859 |
| H  | 1.0685948  | -2.9328634 | -2.4156778 |
| C  | -0.4524058 | 0.8523862  | 2.2665934  |
| O  | -0.2296245 | 1.1747349  | 3.3604434  |
| C  | -2.4233984 | 1.3072312  | 0.6789876  |
| O  | -3.4160986 | 1.8974954  | 0.7306976  |
| C  | -1.7355093 | -1.1548080 | 0.3820937  |
| O  | -2.3509113 | -2.1323996 | 0.2603677  |
| C  | -0.3478435 | 1.3639495  | -0.8211435 |
| O  | 0.0015289  | 1.9904391  | -1.7355152 |
| C  | 3.3084829  | -2.4818241 | 3.2862330  |
| C  | 2.3163873  | -4.3501844 | 1.7523056  |
| C  | 4.6508756  | -3.2338156 | 3.2143430  |
| C  | 3.7126851  | -5.0004541 | 1.7627134  |
| C  | 4.4923205  | -4.7398614 | 3.0458073  |
| H  | 5.2146751  | -2.9910740 | 4.1226462  |
| H  | 5.2191548  | -2.8397588 | 2.3610510  |
| H  | 3.5776170  | -6.0746503 | 1.5900010  |
| H  | 4.2825717  | -4.6010068 | 0.9131059  |
| H  | 5.4765888  | -5.2192129 | 2.9937876  |
| H  | 3.9751097  | -5.1752055 | 3.9096375  |
| N  | 2.4688458  | -2.8831183 | 2.0917820  |
| C  | 2.6127545  | -2.7300534 | 4.6392858  |

|   |           |            |            |
|---|-----------|------------|------------|
| H | 3.1978136 | -2.2634531 | 5.4393788  |
| H | 1.6156677 | -2.2771794 | 4.6393423  |
| H | 2.5123686 | -3.7917321 | 4.8717362  |
| C | 3.6180415 | -0.9865111 | 3.1745492  |
| H | 4.0680538 | -0.7678175 | 2.2028807  |
| H | 2.7158425 | -0.3811653 | 3.2936469  |
| H | 4.3256222 | -0.7071337 | 3.9621764  |
| C | 1.3561272 | -5.1003833 | 2.6968079  |
| H | 1.1554504 | -6.0986350 | 2.2926244  |
| H | 1.7621670 | -5.2203679 | 3.7028539  |
| H | 0.4027833 | -4.5656442 | 2.7678258  |
| C | 1.7691919 | -4.4651708 | 0.3265086  |
| H | 0.7307813 | -4.1291778 | 0.2737445  |
| H | 2.3684977 | -3.8632475 | -0.3599594 |
| H | 1.8050854 | -5.5149476 | 0.0161949  |

**2b<sup>-</sup>** : [Fe(CO)<sub>4</sub>]PcS anion complex

27

Energy = -2725.450158536

|    |            |            |            |
|----|------------|------------|------------|
| N  | 2.1420587  | 0.8892375  | 0.0835556  |
| C  | 3.1046374  | 0.4705390  | -0.9411697 |
| C  | 2.6695351  | 1.7764420  | 1.1128153  |
| P  | 1.1819394  | -0.4530771 | 0.5764707  |
| C  | 2.3154276  | -0.4932110 | -1.8171139 |
| H  | 3.9808181  | -0.0356990 | -0.5002320 |
| H  | 3.4496813  | 1.3478705  | -1.4996178 |
| H  | 1.8567980  | 2.1079468  | 1.7625512  |
| H  | 3.4343373  | 1.2866579  | 1.7366321  |
| H  | 3.1093993  | 2.6558219  | 0.6294014  |
| N  | 1.5555149  | -1.2971698 | -0.8623501 |
| S  | 1.9164992  | -1.4258011 | 2.1613060  |
| H  | 1.6605314  | 0.0590879  | -2.5101605 |
| H  | 2.9755859  | -1.1436322 | -2.4042546 |
| C  | 0.6806476  | -2.3292795 | -1.3887348 |
| H  | 0.3438304  | -2.9741664 | -0.5735914 |
| H  | -0.2059463 | -1.9187359 | -1.8993316 |
| H  | 1.2425549  | -2.9442519 | -2.1011429 |
| Fe | -1.0199682 | 0.1824799  | 0.7709856  |
| C  | -0.5526704 | 1.0436884  | 2.2584169  |
| C  | -0.8008961 | 0.8857304  | -0.8512537 |
| C  | -1.4256228 | -1.5346189 | 1.0167863  |
| C  | -2.7153065 | 0.7177850  | 0.8518225  |
| O  | -0.3196352 | 1.6063859  | 3.2531623  |
| O  | -0.6765317 | 1.3463033  | -1.9156656 |
| O  | -1.7443225 | -2.6406963 | 1.2023863  |
| O  | -3.8220144 | 1.0716683  | 0.9028973  |

**2b<sup>•</sup>** : [Fe(CO)<sub>4</sub>]PcS<sup>•</sup> radical complex

27

Energy = -2725.291630915

|   |           |           |           |
|---|-----------|-----------|-----------|
| N | 2.1295332 | 0.8524606 | 0.1972841 |
|---|-----------|-----------|-----------|

|    |            |            |            |
|----|------------|------------|------------|
| C  | 2.9608150  | 0.6755521  | -1.0030557 |
| C  | 2.6722758  | 1.7128847  | 1.2435406  |
| P  | 1.2025751  | -0.5259232 | 0.5576320  |
| C  | 2.2267037  | -0.3519544 | -1.8633379 |
| H  | 3.9564706  | 0.3052815  | -0.7161683 |
| H  | 3.0779040  | 1.6334169  | -1.5188768 |
| H  | 2.0008878  | 1.7246627  | 2.1033556  |
| H  | 3.6562747  | 1.3562875  | 1.5778743  |
| H  | 2.7719910  | 2.7331935  | 0.8605599  |
| N  | 1.6113809  | -1.2651966 | -0.9002013 |
| S  | 1.6970545  | -1.6266770 | 2.1163076  |
| H  | 1.4831274  | 0.1316511  | -2.5130501 |
| H  | 2.9229317  | -0.9100314 | -2.4979229 |
| C  | 0.9529949  | -2.4751311 | -1.3708553 |
| H  | 0.6432388  | -3.0676980 | -0.5056824 |
| H  | 0.0734213  | -2.2626142 | -1.9958305 |
| H  | 1.6624717  | -3.0666151 | -1.9588044 |
| Fe | -0.9369970 | 0.3541917  | 0.7101489  |
| C  | -0.4555711 | 0.8097567  | 2.4168639  |
| C  | -0.9910980 | 0.3288756  | -1.1072282 |
| C  | -1.6623526 | -1.2642034 | 1.0422721  |
| C  | -2.4480505 | 1.3647123  | 0.8058894  |
| O  | -0.2584687 | 1.1023244  | 3.5114784  |
| O  | -1.0825914 | 0.2937017  | -2.2545340 |
| O  | -2.1210447 | -2.2999434 | 1.2470007  |
| O  | -3.4089958 | 1.9943405  | 0.8699116  |

**2ce\_ts** : 1,2-Fe-shift of [Fe(CO)<sub>4</sub>]PcNMe<sup>•</sup>

31

Energy = -2421.699777690

|    |            |            |            |
|----|------------|------------|------------|
| N  | 2.3890059  | 0.8593942  | 0.0841848  |
| C  | 3.3386645  | -0.0247630 | -0.5906019 |
| C  | 2.6487107  | -1.3843976 | -0.6355221 |
| H  | 4.2826189  | -0.0771090 | -0.0280648 |
| H  | 3.5527706  | 0.3581179  | -1.5948225 |
| H  | 1.9607416  | -1.4526923 | -1.4959673 |
| H  | 3.3656409  | -2.2091613 | -0.6954130 |
| N  | 1.9144168  | -1.4439264 | 0.6297908  |
| C  | 2.6793434  | 2.2839093  | 0.0915609  |
| H  | 1.8349652  | 2.8149427  | 0.5314263  |
| H  | 3.5900294  | 2.4962914  | 0.6690350  |
| H  | 2.8267336  | 2.6374330  | -0.9360335 |
| C  | 1.1876328  | -2.6722328 | 0.9047812  |
| H  | 0.6815972  | -2.5886726 | 1.8694269  |
| H  | 0.4391976  | -2.9008394 | 0.1301313  |
| H  | 1.8993119  | -3.5029401 | 0.9571869  |
| P  | 1.1845809  | 0.1087640  | 0.9768260  |
| Fe | -1.0307691 | 0.0840016  | -0.2251246 |
| C  | -0.1096464 | 0.9174419  | -1.5422310 |
| O  | 0.4374335  | 1.4591564  | -2.4013045 |
| C  | -1.5062797 | -0.9530835 | 1.1808525  |

|   |            |            |            |
|---|------------|------------|------------|
| O | -1.8905007 | -1.6116625 | 2.0503785  |
| C | -2.5576921 | 1.0381731  | -0.3602163 |
| O | -3.5529838 | 1.6107386  | -0.4881223 |
| C | -1.2925955 | -1.3015413 | -1.3072021 |
| O | -1.4806180 | -2.1953918 | -2.0208575 |
| N | 0.0210282  | 1.3512934  | 1.0267593  |
| C | -0.6312380 | 1.7659213  | 2.2714785  |
| H | 0.0453512  | 2.4214290  | 2.8344403  |
| H | -1.5335549 | 2.3298307  | 2.0138473  |
| H | -0.9284643 | 0.9347915  | 2.9248257  |

**2ce<sup>•</sup>** : PcNMe[Fe(CO)<sub>4</sub>]<sup>•</sup> radical complex  
31

Energy = -2421.733886154

|    |            |            |            |
|----|------------|------------|------------|
| N  | 2.1081390  | -1.3843559 | -0.2173123 |
| C  | 2.7429276  | -1.0765177 | 1.0590295  |
| C  | 1.1419387  | -2.4781530 | -0.2174315 |
| P  | 1.7178683  | 0.0543020  | -1.0988139 |
| C  | 3.7004402  | 0.0526777  | 0.7164521  |
| H  | 3.2527262  | -1.9565869 | 1.4645582  |
| H  | 1.9940183  | -0.7330854 | 1.8043274  |
| H  | 1.6431656  | -3.4119284 | 0.0590150  |
| H  | 0.3178895  | -2.3034955 | 0.4912315  |
| H  | 0.7193690  | -2.5882125 | -1.2206152 |
| N  | 2.9354743  | 0.9123724  | -0.2040393 |
| H  | 4.0099824  | 0.6269517  | 1.5970369  |
| H  | 4.5996076  | -0.3361478 | 0.2177022  |
| C  | 3.7037101  | 1.9566993  | -0.8804733 |
| H  | 4.0659000  | 2.6791687  | -0.1407877 |
| H  | 4.5673374  | 1.5366093  | -1.4139250 |
| H  | 3.0607997  | 2.4778674  | -1.5935889 |
| Fe | 0.0604484  | 1.1832605  | 1.4321789  |
| C  | -1.2377164 | -0.0780899 | 1.4716879  |
| C  | 1.6928236  | 2.1201554  | 1.4277972  |
| C  | -0.9975778 | 2.6455598  | 1.3041896  |
| C  | 0.2086741  | 1.1202474  | 3.2148354  |
| O  | -2.0784260 | -0.8663766 | 1.5102644  |
| O  | 2.4636865  | 2.9319303  | 1.7238794  |
| O  | -1.6806243 | 3.5735677  | 1.2454034  |
| O  | 0.3063371  | 1.0789247  | 4.3664993  |
| N  | 0.3045929  | 0.7287676  | -0.4665424 |
| C  | -0.8470769 | 0.7347837  | -1.3829417 |
| H  | -0.5170372 | 0.5279627  | -2.4086752 |
| H  | -1.6006630 | -0.0180323 | -1.1149644 |
| H  | -1.3336798 | 1.7164881  | -1.3672940 |

**2cT** : [Fe(CO)<sub>4</sub>]PcNMeT complex  
59

Energy = -2830.564117340

|    |            |            |           |
|----|------------|------------|-----------|
| P  | 1.1360225  | -0.9042923 | 0.5015877 |
| Fe | -0.7314209 | 0.3703706  | 0.5871764 |

|   |            |            |            |
|---|------------|------------|------------|
| N | 2.5615566  | -0.0313159 | 0.5009041  |
| N | 1.4871411  | -1.6091264 | -0.9931933 |
| N | 1.1666597  | -2.0921474 | 1.7288816  |
| C | -0.3664564 | 0.6970740  | 2.2998188  |
| C | -2.1067716 | 1.5081032  | 0.6222428  |
| C | -1.7928146 | -1.0099087 | 0.1945615  |
| C | 0.0258919  | 1.2556516  | -0.7709824 |
| C | 3.5185695  | -0.5072838 | -0.5092769 |
| C | 2.7534784  | 1.3036685  | 1.0509889  |
| C | 2.6638848  | -1.0456728 | -1.6545175 |
| C | 0.4666780  | -2.1956715 | -1.8474258 |
| N | 2.3912472  | -2.7920357 | 1.9532426  |
| C | -0.0807845 | -2.5845029 | 2.3437280  |
| O | -0.1660659 | 0.9187284  | 3.4246380  |
| O | -2.9946224 | 2.2489325  | 0.6495509  |
| O | -2.5340893 | -1.8747426 | -0.0396348 |
| O | 0.5027773  | 1.8378669  | -1.6559632 |
| H | 4.1536770  | -1.2978013 | -0.0892896 |
| H | 4.1489092  | 0.3260161  | -0.8289962 |
| H | 1.9255954  | 1.5552756  | 1.7125237  |
| H | 3.6838875  | 1.3556968  | 1.6280704  |
| H | 2.7949315  | 2.0517893  | 0.2484883  |
| H | 2.3811498  | -0.2447901 | -2.3552305 |
| H | 3.1854471  | -1.8301742 | -2.2165129 |
| H | -0.3019234 | -2.6769229 | -1.2420088 |
| H | -0.0144571 | -1.4419163 | -2.4884171 |
| H | 0.9218127  | -2.9621636 | -2.4844814 |
| C | 2.4154394  | -4.2502389 | 1.5501909  |
| C | 3.0789887  | -2.4227158 | 3.2494301  |
| H | -0.5436309 | -3.3893996 | 1.7603728  |
| H | 0.1375958  | -2.9521095 | 3.3440733  |
| H | -0.7908650 | -1.7622291 | 2.4210168  |
| C | 3.8980328  | -4.6722293 | 1.4942906  |
| C | 1.6582375  | -5.2636407 | 2.4525796  |
| C | 1.8459231  | -4.4044933 | 0.1398213  |
| C | 4.5259872  | -2.9540306 | 3.1595794  |
| C | 2.4029754  | -2.9071510 | 4.5567011  |
| C | 3.1921201  | -0.9020726 | 3.3700463  |
| C | 4.6280346  | -4.4331709 | 2.8113762  |
| H | 3.9374612  | -5.7298565 | 1.2063586  |
| H | 4.3874695  | -4.0929889 | 0.7002863  |
| H | 1.6597948  | -6.2301371 | 1.9362454  |
| H | 2.1378263  | -5.4169090 | 3.4194795  |
| H | 0.6190881  | -4.9828781 | 2.6225971  |
| H | 0.7817204  | -4.1578634 | 0.1015591  |
| H | 2.3767580  | -3.7651227 | -0.5648549 |
| H | 1.9585148  | -5.4500485 | -0.1646050 |
| H | 5.0232924  | -2.7354841 | 4.1120677  |
| H | 5.0407529  | -2.3758612 | 2.3809220  |
| H | 3.0600341  | -2.6518509 | 5.3958519  |
| H | 1.4549267  | -2.3875037 | 4.7215314  |

|   |           |            |           |
|---|-----------|------------|-----------|
| H | 2.2219097 | -3.9800981 | 4.5914503 |
| H | 3.7928364 | -0.4990736 | 2.5563513 |
| H | 2.2122395 | -0.4205009 | 3.3666933 |
| H | 3.6849745 | -0.6675090 | 4.3196975 |
| H | 5.6806280 | -4.7263063 | 2.7204926 |
| H | 4.1985076 | -5.0501382 | 3.6101949 |

**2c<sup>-</sup>** : [Fe(CO)<sub>4</sub>]PcNMe<sup>-</sup> anion complex

31

Energy = -2421.891679309

|    |            |            |            |
|----|------------|------------|------------|
| N  | 2.5792696  | 0.5251763  | 0.0710891  |
| C  | 3.3482200  | 0.4888431  | -1.1712161 |
| C  | 3.3157899  | 0.9789013  | 1.2419361  |
| P  | 1.5803170  | -0.8751960 | 0.2595146  |
| C  | 2.4374353  | -0.2207300 | -2.1675447 |
| H  | 4.2915115  | -0.0745696 | -1.0478511 |
| H  | 3.5966902  | 1.5063087  | -1.4982501 |
| H  | 2.6642104  | 0.9608212  | 2.1179202  |
| H  | 4.1936281  | 0.3458100  | 1.4550908  |
| H  | 3.6568584  | 2.0097318  | 1.0857596  |
| N  | 1.8198593  | -1.2868034 | -1.3858911 |
| N  | 2.2028032  | -2.0179969 | 1.1593853  |
| H  | 1.6941693  | 0.4768479  | -2.5844806 |
| H  | 3.0091656  | -0.6522906 | -2.9992528 |
| C  | 0.8745076  | -2.1487090 | -2.0739023 |
| C  | 1.6555395  | -2.4960919 | 2.4095810  |
| H  | 0.5915979  | -2.9727589 | -1.4144515 |
| H  | -0.0417756 | -1.6176415 | -2.3809927 |
| H  | 1.3513081  | -2.5692413 | -2.9676480 |
| H  | 2.2459121  | -2.1489423 | 3.2742836  |
| H  | 0.6151173  | -2.1725139 | 2.5795642  |
| H  | 1.6623447  | -3.5968773 | 2.4352480  |
| Fe | -0.6025185 | -0.2055583 | 0.7691712  |
| C  | 0.0341937  | 0.3337971  | 2.3347893  |
| C  | -2.2661471 | 0.2988379  | 1.1287003  |
| C  | -1.0495766 | -1.9165507 | 0.5799377  |
| C  | -0.4414956 | 0.8762548  | -0.6319627 |
| O  | 0.3895011  | 0.7036885  | 3.3867585  |
| O  | -3.3572572 | 0.6342186  | 1.3635121  |
| O  | -1.3924167 | -3.0299043 | 0.4833143  |
| O  | -0.3829949 | 1.6123053  | -1.5374009 |

**2c<sup>•</sup>** : [Fe(CO)<sub>4</sub>]PcNMe<sup>•</sup> radical complex

31

Energy = -2421.742413046

|   |           |            |            |
|---|-----------|------------|------------|
| N | 2.5284607 | 0.6186986  | 0.0661635  |
| C | 3.5231595 | 0.1773157  | -0.9272327 |
| C | 2.9898550 | 1.5262308  | 1.1138614  |
| P | 1.4132868 | -0.6096491 | 0.3536876  |
| C | 2.7160776 | -0.6478996 | -1.9212341 |
| H | 4.3223659 | -0.4219125 | -0.4650850 |

|    |            |            |            |
|----|------------|------------|------------|
| H  | 3.9712411  | 1.0569270  | -1.3982902 |
| H  | 2.1329429  | 1.8917562  | 1.6815312  |
| H  | 3.6975035  | 1.0468161  | 1.8036167  |
| H  | 3.4793602  | 2.3809600  | 0.6373929  |
| N  | 1.7445465  | -1.3938467 | -1.1029642 |
| N  | 1.9313923  | -1.4886318 | 1.6676849  |
| H  | 2.1960971  | 0.0061133  | -2.6368390 |
| H  | 3.3463538  | -1.3501096 | -2.4764271 |
| C  | 0.7508593  | -2.1737250 | -1.8391459 |
| C  | 2.0028729  | -2.9319034 | 1.6507928  |
| H  | 0.1667921  | -2.7870568 | -1.1531259 |
| H  | 0.0674043  | -1.5346512 | -2.4163562 |
| H  | 1.2757663  | -2.8422616 | -2.5285782 |
| H  | 2.6980983  | -3.2698483 | 2.4256977  |
| H  | 1.0159197  | -3.3600928 | 1.8900965  |
| H  | 2.3037650  | -3.3262808 | 0.6694538  |
| Fe | -0.6546912 | -0.0088617 | 0.9028188  |
| C  | -0.0183752 | 0.6569639  | 2.4479508  |
| C  | -2.3084810 | 0.5565408  | 1.3106528  |
| C  | -1.1914613 | -1.7150829 | 0.8432355  |
| C  | -0.6124565 | 0.9421412  | -0.6103196 |
| O  | 0.3147358  | 1.0853134  | 3.4724323  |
| O  | -3.3714304 | 0.9271928  | 1.5677994  |
| O  | -1.5723388 | -2.8123553 | 0.8429633  |
| O  | -0.5838548 | 1.5503662  | -1.5975223 |

**2de<sub>ts</sub>** : 1,2-Fe-shift of [Fe(CO)<sub>4</sub>]PcPMe<sup>•</sup>

31

Energy = -2708.346055296

|    |            |            |            |
|----|------------|------------|------------|
| N  | 2.2634376  | -0.0313454 | 1.2374555  |
| C  | 3.2636675  | 0.7597544  | 0.5111371  |
| C  | 2.8822835  | 0.6511660  | -0.9644312 |
| H  | 4.2615561  | 0.3392604  | 0.7001204  |
| H  | 3.2560461  | 1.8007381  | 0.8546745  |
| H  | 2.1851486  | 1.4549612  | -1.2534567 |
| H  | 3.7569039  | 0.6989744  | -1.6203918 |
| N  | 2.2349293  | -0.6591374 | -1.0813754 |
| C  | 2.3576652  | -0.0479034 | 2.6882498  |
| H  | 1.6995344  | -0.8188505 | 3.0913092  |
| H  | 3.3929390  | -0.2644224 | 2.9831143  |
| H  | 2.0655671  | 0.9202717  | 3.1152129  |
| C  | 1.7954491  | -1.0530586 | -2.4123111 |
| H  | 1.3248616  | -2.0379239 | -2.3636825 |
| H  | 1.0810920  | -0.3390226 | -2.8478713 |
| H  | 2.6685198  | -1.1140082 | -3.0699009 |
| P  | 1.2289611  | -0.9580818 | 0.2915943  |
| Fe | -0.9655822 | 0.4291226  | -0.2983496 |
| C  | -0.1326373 | 1.6833964  | 0.6867370  |
| O  | 0.3773688  | 2.5007488  | 1.3252602  |
| C  | -0.6715826 | 1.3640869  | -1.7924292 |
| O  | -0.5210440 | 1.9913266  | -2.7539108 |

|   |            |            |            |
|---|------------|------------|------------|
| C | -1.2501204 | -1.0816498 | -1.2308509 |
| O | -1.4849649 | -2.0326089 | -1.8479843 |
| C | -2.6732853 | 0.8340723  | 0.0927023  |
| O | -3.7711660 | 1.0911950  | 0.3450629  |
| P | -0.7250989 | -0.8763487 | 1.6730814  |
| C | -1.4526029 | -2.5546132 | 1.3391592  |
| H | -1.4062697 | -3.1224102 | 2.2741881  |
| H | -2.4982204 | -2.4734203 | 1.0268940  |
| H | -0.8918858 | -3.0970402 | 0.5711220  |

**2de<sup>•</sup>** : PcPMe[Fe(CO)<sub>4</sub>]<sup>•</sup> radical complex  
31

Energy = -2708.364342998

|    |            |            |            |
|----|------------|------------|------------|
| N  | 2.0977996  | -1.6477169 | -0.0659018 |
| C  | 2.7073421  | -1.1417864 | 1.1735311  |
| C  | 1.1880207  | -2.7853497 | 0.0418305  |
| P  | 1.7895922  | -0.3801623 | -1.1419232 |
| C  | 3.6069196  | 0.0219965  | 0.7479644  |
| H  | 3.2677348  | -1.9392377 | 1.6700072  |
| H  | 1.9147302  | -0.7794285 | 1.8507888  |
| H  | 1.7309287  | -3.6363353 | 0.4647574  |
| H  | 0.3242503  | -2.5645726 | 0.6813522  |
| H  | 0.8287429  | -3.0563320 | -0.9534918 |
| N  | 2.9946208  | 0.5722467  | -0.4699652 |
| H  | 3.6609297  | 0.7857237  | 1.5331492  |
| H  | 4.6277190  | -0.3145446 | 0.5183702  |
| C  | 3.7201912  | 1.5977984  | -1.2090861 |
| H  | 3.7898128  | 2.5172750  | -0.6192071 |
| H  | 4.7350211  | 1.2529013  | -1.4524834 |
| H  | 3.1929586  | 1.8180572  | -2.1401972 |
| Fe | -0.2758359 | 1.1659194  | 1.6826433  |
| C  | -0.9181480 | -0.4809060 | 2.0715755  |
| C  | 0.8338655  | 2.3928538  | 1.0011415  |
| C  | -1.7878466 | 2.1201871  | 1.7216768  |
| C  | 0.3826171  | 1.3730472  | 3.3351629  |
| O  | -1.3708949 | -1.5105865 | 2.3408858  |
| O  | 1.5198004  | 3.2385186  | 0.6036074  |
| O  | -2.7630110 | 2.7429236  | 1.7406700  |
| O  | 0.8171912  | 1.5124096  | 4.3992435  |
| P  | -0.3152851 | 0.4121773  | -0.4959996 |
| C  | -0.2980586 | 1.8289599  | -1.7189181 |
| H  | -0.2869944 | 1.4006365  | -2.7267147 |
| H  | -1.2299047 | 2.3884390  | -1.5901547 |
| H  | 0.5402459  | 2.5222030  | -1.6156310 |

**2dT** : [Fe(CO)<sub>4</sub>]PcNMeT complex

59

Energy = -3117.219316383

|    |            |            |           |
|----|------------|------------|-----------|
| P  | 1.0591264  | -0.6339558 | 0.3971981 |
| Fe | -0.8935368 | 0.5032009  | 0.2829880 |
| N  | 2.4161295  | 0.3602050  | 0.4427661 |

|   |            |            |            |
|---|------------|------------|------------|
| N | 1.6394119  | -1.4540913 | -0.9829738 |
| P | 0.7710925  | -2.4895794 | 1.6303101  |
| C | -0.6807928 | 1.0503167  | 1.9665943  |
| C | -2.3939482 | 1.4567608  | 0.0928373  |
| C | -1.7798314 | -1.0273298 | 0.0032209  |
| C | -0.1088002 | 1.3746644  | -1.0616414 |
| C | 3.4911936  | -0.0787412 | -0.4531743 |
| C | 2.6035001  | 1.5431184  | 1.2650895  |
| C | 2.7647383  | -0.7536413 | -1.6117270 |
| C | 0.7066817  | -2.1299280 | -1.8789117 |
| N | 2.2694797  | -3.1790472 | 2.0602162  |
| C | -0.1527932 | -1.9371185 | 3.1350343  |
| O | -0.5961200 | 1.4334768  | 3.0632048  |
| O | -3.3598334 | 2.0815105  | -0.0344630 |
| O | -2.4426051 | -1.9624418 | -0.1939830 |
| O | 0.3956273  | 1.9579226  | -1.9320365 |
| H | 4.1804830  | -0.7756943 | 0.0449235  |
| H | 4.0578160  | 0.7971018  | -0.7832315 |
| H | 1.6390797  | 1.8711234  | 1.6546622  |
| H | 3.2837988  | 1.3662267  | 2.1077288  |
| H | 3.0149058  | 2.3481062  | 0.6450678  |
| H | 2.4194974  | -0.0069020 | -2.3423817 |
| H | 3.3999480  | -1.4819741 | -2.1268094 |
| H | 0.0051478  | -2.7235382 | -1.2895488 |
| H | 0.1408931  | -1.4206486 | -2.5012194 |
| H | 1.2691733  | -2.8060797 | -2.5303079 |
| C | 2.4416940  | -4.6021979 | 1.5514296  |
| C | 3.1152762  | -2.6995365 | 3.2135554  |
| H | -0.4182401 | -2.8425009 | 3.6900112  |
| H | 0.3496139  | -1.2383389 | 3.8052796  |
| H | -1.0777502 | -1.4804805 | 2.7732148  |
| C | 3.9350025  | -4.9774057 | 1.5003816  |
| C | 1.6513063  | -5.6024005 | 2.4162415  |
| C | 1.9322168  | -4.7160178 | 0.1045290  |
| C | 4.5742799  | -3.1678631 | 3.0338356  |
| C | 2.5963552  | -3.1869146 | 4.5841194  |
| C | 3.1646194  | -1.1701324 | 3.2093033  |
| C | 4.6980485  | -4.6626367 | 2.7783201  |
| H | 3.9941398  | -6.0434865 | 1.2520639  |
| H | 4.3971267  | -4.4244981 | 0.6711527  |
| H | 1.6799360  | -6.5964834 | 1.9556131  |
| H | 2.0488056  | -5.6875772 | 3.4298075  |
| H | 0.6040182  | -5.2852319 | 2.4803891  |
| H | 0.8425721  | -4.6713169 | 0.0440409  |
| H | 2.3498316  | -3.9106225 | -0.5051034 |
| H | 2.2596070  | -5.6807126 | -0.2998458 |
| H | 5.1299077  | -2.8660082 | 3.9294933  |
| H | 5.0087700  | -2.6278006 | 2.1817352  |
| H | 3.1991798  | -2.7312999 | 5.3777375  |
| H | 1.5556521  | -2.9027411 | 4.7431197  |
| H | 2.6722701  | -4.2708303 | 4.6887678  |

|   |           |            |           |
|---|-----------|------------|-----------|
| H | 3.5994201 | -0.8189164 | 2.2729699 |
| H | 2.1832449 | -0.7070690 | 3.3307972 |
| H | 3.7965036 | -0.8337009 | 4.0375138 |
| H | 5.7518111 | -4.9435980 | 2.6690432 |
| H | 4.3028024 | -5.2396103 | 3.6233217 |

**2d<sup>-</sup>** : [Fe(CO)<sub>4</sub>]PcNMe<sup>-</sup> anion complex

31

Energy = -2708.504719307

|    |            |            |            |
|----|------------|------------|------------|
| N  | 2.4141091  | 0.3937748  | 0.2008553  |
| C  | 3.2285647  | 0.0693090  | -0.9660227 |
| C  | 3.0953186  | 1.0366262  | 1.3108407  |
| P  | 1.1631577  | -0.7548127 | 0.5049164  |
| C  | 2.2860716  | -0.6820287 | -1.9010620 |
| H  | 4.0905844  | -0.5653111 | -0.6945847 |
| H  | 3.6102708  | 0.9882700  | -1.4288213 |
| H  | 2.3998818  | 1.1630837  | 2.1424187  |
| H  | 3.9534016  | 0.4457867  | 1.6724871  |
| H  | 3.4594367  | 2.0246213  | 1.0018812  |
| N  | 1.4824094  | -1.5084118 | -1.0059236 |
| P  | 1.4437529  | -2.0974566 | 2.0904721  |
| H  | 1.6702839  | 0.0206390  | -2.4847373 |
| H  | 2.8372025  | -1.3224894 | -2.6006395 |
| C  | 0.4893524  | -2.3802786 | -1.6066474 |
| C  | 3.1345564  | -2.7822376 | 1.5781057  |
| H  | 0.0628243  | -3.0171141 | -0.8270611 |
| H  | -0.3277619 | -1.8226435 | -2.0934709 |
| H  | 0.9738564  | -3.0191108 | -2.3544717 |
| H  | 3.3172863  | -3.6973548 | 2.1539682  |
| H  | 3.1485145  | -3.0334070 | 0.5119905  |
| H  | 3.9531378  | -2.0834104 | 1.7850018  |
| Fe | -0.8844410 | 0.2730057  | 0.7485583  |
| C  | -0.2931689 | 0.8667944  | 2.3210758  |
| C  | -2.4621118 | 1.0778240  | 0.9031747  |
| C  | -1.6202413 | -1.3534454 | 0.6973391  |
| C  | -0.4670900 | 1.1727763  | -0.7262955 |
| O  | 0.0102018  | 1.3112509  | 3.3575722  |
| O  | -3.4925182 | 1.6104573  | 0.9995143  |
| O  | -2.1879386 | -2.3726112 | 0.6704929  |
| O  | -0.2131366 | 1.7870713  | -1.6862153 |

**2d<sup>•</sup>** : [Fe(CO)<sub>4</sub>]PcPMe<sup>•</sup> radical complex

31

Energy = -2708.369548417

|   |           |            |            |
|---|-----------|------------|------------|
| N | 2.4235575 | 0.3587353  | 0.1983928  |
| C | 3.3232860 | -0.0703220 | -0.8782214 |
| C | 2.9611202 | 1.2207411  | 1.2432458  |
| P | 1.1286645 | -0.7010340 | 0.4334811  |
| C | 2.4205811 | -0.8139841 | -1.8568737 |
| H | 4.1283581 | -0.7183987 | -0.5031232 |
| H | 3.7762919 | 0.8143054  | -1.3374638 |

|    |            |            |            |
|----|------------|------------|------------|
| H  | 2.1534740  | 1.5406330  | 1.9037679  |
| H  | 3.7324430  | 0.7176200  | 1.8433062  |
| H  | 3.4017760  | 2.1082751  | 0.7782903  |
| N  | 1.4434432  | -1.5201486 | -1.0132310 |
| P  | 1.5383817  | -2.1306445 | 2.0667009  |
| H  | 1.9180750  | -0.1105996 | -2.5368375 |
| H  | 2.9792897  | -1.5418168 | -2.4535278 |
| C  | 0.4127795  | -2.2988937 | -1.6955123 |
| C  | 3.1671006  | -2.7996547 | 1.4893350  |
| H  | -0.1407149 | -2.8974343 | -0.9698905 |
| H  | -0.2939840 | -1.6614935 | -2.2457293 |
| H  | 0.8995821  | -2.9806630 | -2.3992841 |
| H  | 3.4019322  | -3.6979770 | 2.0677663  |
| H  | 3.1340389  | -3.0453990 | 0.4237845  |
| H  | 3.9622227  | -2.0631578 | 1.6603333  |
| Fe | -0.8516015 | 0.2550648  | 0.8012058  |
| C  | -0.2995976 | 0.7427484  | 2.4288534  |
| C  | -2.4196125 | 1.1036635  | 0.9964567  |
| C  | -1.6298248 | -1.3528159 | 0.7819744  |
| C  | -0.5053922 | 1.1734744  | -0.6953591 |
| O  | -0.0018181 | 1.0711344  | 3.5033336  |
| O  | -3.4274102 | 1.6567851  | 1.1152198  |
| O  | -2.1817491 | -2.3749479 | 0.7928382  |
| O  | -0.2789256 | 1.7653716  | -1.6685208 |

**3aa<sup>•</sup>** : higher [W(CO)<sub>5</sub>]PPh<sub>2</sub>O<sup>•</sup> radical complex

35

Energy = -1514.544602916

|   |            |           |            |
|---|------------|-----------|------------|
| P | 0.6376233  | 1.3298833 | -0.0386598 |
| O | 2.0949351  | 0.8547317 | -0.2154122 |
| C | 0.4423268  | 2.2903683 | 1.4876083  |
| C | 0.0860863  | 2.3662456 | -1.4151932 |
| C | -0.4168820 | 3.3909155 | 1.6049897  |
| C | 1.1952642  | 1.8720604 | 2.5964635  |
| C | 1.0412424  | 2.7743353 | -2.3573583 |
| C | -1.2621089 | 2.7151213 | -1.5894372 |
| C | -0.5224296 | 4.0633534 | 2.8226140  |
| H | -0.9871643 | 3.7367380 | 0.7493519  |
| C | 1.0922937  | 2.5528744 | 3.8062614  |
| H | 1.8679335  | 1.0246309 | 2.4994672  |
| C | 0.6502347  | 3.5421369 | -3.4535400 |
| H | 2.0794851  | 2.4850844 | -2.2262375 |
| C | -1.6446348 | 3.4853717 | -2.6856990 |
| H | -2.0143760 | 2.3841054 | -0.8800948 |
| C | 0.2288860  | 3.6458067 | 3.9224530  |
| H | -1.1862307 | 4.9186987 | 2.9078854  |
| H | 1.6839528  | 2.2312140 | 4.6581444  |
| C | -0.6896002 | 3.8996621 | -3.6176277 |
| H | 1.3925387  | 3.8597753 | -4.1799532 |
| H | -2.6881575 | 3.7560834 | -2.8158318 |
| H | 0.1453397  | 4.1731105 | 4.8682361  |



|   |            |            |            |
|---|------------|------------|------------|
| H | -0.9916193 | 4.4952191  | -4.4741319 |
| W | 0.0580093  | -1.1567339 | -0.1012309 |
| C | -0.7704814 | -2.9965464 | -0.1526628 |
| C | 0.5789757  | -1.1805681 | -2.1039519 |
| C | -0.4058007 | -1.0052146 | 1.8978704  |
| C | -1.8285960 | -0.5297307 | -0.6542611 |
| C | 1.8964513  | -1.9923670 | 0.4313287  |
| O | -1.3018975 | -4.0264211 | -0.1771728 |
| O | 0.8655008  | -1.1747964 | -3.2196847 |
| O | -0.6738589 | -0.9207947 | 3.0168185  |
| O | -2.8993354 | -0.2414400 | -0.9695479 |
| O | 2.8833127  | -2.5043424 | 0.7239701  |

**3ac\*** : [W(CO)<sub>5</sub>]PPh<sub>2</sub>O\* with CO in ring  
35

Energy = -1514.525254902

|   |            |            |            |
|---|------------|------------|------------|
| P | -2.5349847 | 1.0492968  | 0.1306206  |
| C | -2.6724699 | 2.0130549  | 1.6467385  |
| C | -2.6098002 | 2.2738260  | -1.1926279 |
| O | -0.9584267 | 0.4816344  | 0.0522934  |
| C | -1.8437135 | 3.1295362  | 1.8516888  |
| C | -3.6088257 | 1.6478406  | 2.6223513  |
| C | -1.8271683 | 2.1118419  | -2.3451501 |
| C | -3.5267989 | 3.3329237  | -1.1109719 |
| C | -1.9457907 | 3.8574907  | 3.0330384  |
| H | -1.1241944 | 3.4212602  | 1.0922803  |
| C | -3.7181767 | 2.3912306  | 3.7971444  |
| H | -4.2523840 | 0.7885624  | 2.4602836  |
| C | -1.9516389 | 3.0149997  | -3.3990080 |
| H | -1.1161088 | 1.2945811  | -2.4104765 |
| C | -3.6538028 | 4.2247205  | -2.1740933 |
| H | -4.1307383 | 3.4648508  | -0.2177369 |
| C | -2.8842618 | 3.4906911  | 4.0033589  |
| H | -1.2985747 | 4.7137335  | 3.1967997  |
| H | -4.4494759 | 2.1107471  | 4.5485578  |
| C | -2.8657431 | 4.0678589  | -3.3166466 |
| H | -1.3345041 | 2.8960787  | -4.2844267 |
| H | -4.3623591 | 5.0447540  | -2.1072977 |
| H | -2.9653549 | 4.0664487  | 4.9205787  |
| H | -2.9621401 | 4.7675555  | -4.1415455 |
| W | -3.3971692 | -1.3108347 | -0.1407664 |
| C | -3.8840482 | -3.2933619 | -0.4165529 |
| C | -3.4301956 | -1.0094393 | -2.1737005 |
| C | -3.2110780 | -1.6732301 | 1.8721205  |
| C | -5.2523147 | -0.5115071 | 0.0816983  |
| C | -1.2140152 | -0.9146622 | -0.1387401 |
| O | -4.1856115 | -4.3983135 | -0.5689097 |
| O | -3.4420426 | -0.8456052 | -3.3171808 |
| O | -3.0870287 | -1.8975534 | 2.9992530  |
| O | -6.2664006 | 0.0293224  | 0.2193900  |
| O | -0.2675164 | -1.6523167 | -0.2674778 |

**3ae\_ts** : P-to-O 1,2-W-shift of [W(CO)<sub>5</sub>]PPh<sub>2</sub>O\*  
35

Energy = -1514.541365852

|   |            |            |            |
|---|------------|------------|------------|
| P | 0.2365715  | 1.2728180  | 0.0430706  |
| O | 1.4966251  | 0.3646360  | 0.1751435  |
| C | 0.1605786  | 2.4542923  | 1.4028341  |
| C | 0.2202037  | 2.1694839  | -1.5211373 |
| C | -0.5472365 | 3.6635831  | 1.3142993  |
| C | 0.7887958  | 2.0958256  | 2.6074147  |
| C | 1.3924070  | 2.2064397  | -2.2916506 |
| C | -0.9625909 | 2.7461496  | -2.0103432 |
| C | -0.6122728 | 4.5090806  | 2.4192110  |
| H | -1.0277965 | 3.9535199  | 0.3853719  |
| C | 0.7233331  | 2.9509957  | 3.7046174  |
| H | 1.3396593  | 1.1621300  | 2.6681726  |
| C | 1.3841559  | 2.8462640  | -3.5295680 |
| H | 2.2952969  | 1.7330709  | -1.9180966 |
| C | -0.9591577 | 3.3892379  | -3.2464751 |
| H | -1.8847259 | 2.6797050  | -1.4393920 |
| C | 0.0199433  | 4.1549497  | 3.6143509  |
| H | -1.1514198 | 5.4488601  | 2.3451274  |
| H | 1.2220455  | 2.6782694  | 4.6299675  |
| C | 0.2128923  | 3.4411190  | -4.0052844 |
| H | 2.2927163  | 2.8799132  | -4.1237172 |
| H | -1.8733741 | 3.8383971  | -3.6227267 |
| H | -0.0332297 | 4.8179560  | 4.4727877  |
| H | 0.2102223  | 3.9355889  | -4.9721804 |
| W | -0.0672451 | -1.3496953 | 0.0775592  |
| C | -0.9871654 | -3.1271423 | 0.0521974  |
| C | 0.5625166  | -1.5661446 | -1.8817482 |
| C | -0.6753613 | -1.0919146 | 2.0317756  |
| C | -1.8828525 | -0.6897105 | -0.6514988 |
| C | 1.5918698  | -2.4420125 | 0.7380141  |
| O | -1.5009036 | -4.1718749 | 0.0385644  |
| O | 0.9013146  | -1.6965801 | -2.9750839 |
| O | -1.0384635 | -0.9737365 | 3.1206406  |
| O | -2.9171905 | -0.3921572 | -1.0677608 |
| O | 2.4279193  | -3.1631782 | 1.0680354  |

**3ae\*** : PPh<sub>2</sub>O[W(CO)<sub>5</sub>]\* radical complex  
35

Energy = -1514.542089110

|   |            |            |            |
|---|------------|------------|------------|
| P | -1.6241892 | -0.9812711 | -0.8290195 |
| C | -2.7227338 | -1.7842123 | 0.3529499  |
| C | -2.2603243 | 0.6974617  | -1.0946332 |
| O | -0.2162780 | -0.9229284 | -0.1699114 |
| C | -2.2109117 | -2.3524547 | 1.5294736  |
| C | -4.0920516 | -1.8935629 | 0.0564205  |
| C | -3.0207461 | 1.3597415  | -0.1177201 |
| C | -1.9018441 | 1.3649706  | -2.2762866 |

|   |            |            |            |
|---|------------|------------|------------|
| C | -3.0714044 | -2.9989198 | 2.4149131  |
| H | -1.1501555 | -2.2731631 | 1.7451448  |
| C | -4.9447587 | -2.5372057 | 0.9492433  |
| H | -4.4878871 | -1.4676837 | -0.8618743 |
| C | -3.3991659 | 2.6850784  | -0.3194301 |
| H | -3.3016423 | 0.8448911  | 0.7956771  |
| C | -2.2797356 | 2.6920370  | -2.4683140 |
| H | -1.3304140 | 0.8449389  | -3.0400672 |
| C | -4.4358549 | -3.0911447 | 2.1278712  |
| H | -2.6780612 | -3.4275431 | 3.3320436  |
| H | -6.0047336 | -2.6105533 | 0.7249779  |
| C | -3.0265290 | 3.3513349  | -1.4897155 |
| H | -3.9785392 | 3.2009782  | 0.4405607  |
| H | -1.9963342 | 3.2091976  | -3.3799937 |
| H | -5.1024503 | -3.5965572 | 2.8204192  |
| H | -3.3217812 | 4.3855859  | -1.6399084 |
| W | 1.5428358  | 0.2875210  | -0.0555327 |
| C | 3.2114041  | 1.3672001  | 0.1586812  |
| C | 0.5185438  | 2.0687340  | 0.1817737  |
| C | 2.7375513  | -1.3834919 | -0.2756146 |
| C | 1.6161803  | 0.6770544  | -2.0799098 |
| C | 1.5582552  | -0.0252552 | 1.9916373  |
| O | 4.1815676  | 2.0028393  | 0.2799427  |
| O | 0.0681355  | 3.1227742  | 0.3254580  |
| O | 3.4718176  | -2.2684943 | -0.3854764 |
| O | 1.7063084  | 0.9397817  | -3.2019161 |
| O | 1.6241753  | -0.1635651 | 3.1357597  |

**3aT** : [W(CO)<sub>5</sub>]PPh<sub>2</sub>OT complex

63

Energy = -1923.351944388

|   |            |            |            |
|---|------------|------------|------------|
| P | 0.3637455  | 0.7915531  | 0.0335315  |
| O | -1.2040581 | 1.2909157  | 0.2210713  |
| C | 0.9019057  | 2.0167002  | -1.2205655 |
| C | 1.0820556  | 1.5372913  | 1.5478622  |
| N | -2.2869719 | 0.2916471  | 0.1115882  |
| C | 0.2703696  | 3.2686327  | -1.2929764 |
| C | 1.9629384  | 1.7393281  | -2.0888969 |
| C | 2.2955581  | 1.0694631  | 2.0648160  |
| C | 0.4440523  | 2.6162263  | 2.1791858  |
| C | -3.0956036 | 0.6850984  | -1.0886631 |
| C | -2.9526226 | 0.2530232  | 1.4551868  |
| C | 0.6869009  | 4.2137387  | -2.2270890 |
| H | -0.5537349 | 3.4973853  | -0.6262398 |
| C | 2.3860712  | 2.6900941  | -3.0185522 |
| H | 2.4592512  | 0.7762453  | -2.0453246 |
| C | 2.8616736  | 1.6613425  | 3.1940237  |
| H | 2.7999375  | 0.2353424  | 1.5897935  |
| C | 1.0054037  | 3.2015313  | 3.3120076  |
| H | -0.4972512 | 2.9881454  | 1.7907805  |
| C | -4.2931098 | -0.2868052 | -1.1369146 |

|   |            |            |            |
|---|------------|------------|------------|
| C | -2.2196593 | 0.4330151  | -2.3217487 |
| C | -3.5709634 | 2.1505337  | -1.1172489 |
| C | -4.1561941 | -0.7019770 | 1.3125423  |
| C | -3.3990941 | 1.6178596  | 2.0157986  |
| C | -1.9510162 | -0.3730467 | 2.4331728  |
| C | 1.7472056  | 3.9277454  | -3.0917081 |
| H | 0.1842557  | 5.1753136  | -2.2803153 |
| H | 3.2094042  | 2.4589553  | -3.6879789 |
| C | 2.2163102  | 2.7267838  | 3.8222066  |
| H | 3.8020840  | 1.2841234  | 3.5851190  |
| H | 0.4962789  | 4.0293107  | 3.7974911  |
| C | -5.0882826 | -0.3178410 | 0.1659108  |
| H | -3.9143258 | -1.2930742 | -1.3502480 |
| H | -4.9238401 | 0.0117134  | -1.9820534 |
| H | -1.3684125 | 1.1187674  | -2.3572686 |
| H | -1.8481264 | -0.5939132 | -2.3187337 |
| H | -2.8147716 | 0.5861874  | -3.2276849 |
| H | -2.7450456 | 2.8263450  | -0.8853112 |
| H | -4.3889114 | 2.3446698  | -0.4222810 |
| H | -3.9269813 | 2.3819752  | -2.1265364 |
| H | -3.7766741 | -1.7160124 | 1.1426207  |
| H | -4.6859852 | -0.7070621 | 2.2720919  |
| H | -2.6060551 | 2.3597228  | 1.9032400  |
| H | -4.3026758 | 1.9969060  | 1.5363534  |
| H | -3.6100902 | 1.5044401  | 3.0842105  |
| H | -1.5963390 | -1.3328034 | 2.0509366  |
| H | -1.0912308 | 0.2812425  | 2.6013285  |
| H | -2.4417175 | -0.5414467 | 3.3971373  |
| H | 2.0706891  | 4.6662313  | -3.8195113 |
| H | 2.6516071  | 3.1832614  | 4.7063995  |
| H | -5.9040056 | -1.0453940 | 0.0880820  |
| H | -5.5546196 | 0.6561381  | 0.3568182  |
| W | 0.9576498  | -1.6384441 | -0.4119774 |
| C | 1.0876776  | -1.9589453 | 1.6186424  |
| C | 2.9521236  | -1.1742115 | -0.4903729 |
| C | -0.9845851 | -2.3581868 | -0.3958874 |
| C | 0.7999160  | -1.3292677 | -2.4414731 |
| C | 1.5161826  | -3.5577445 | -0.7496602 |
| O | 1.1668649  | -2.1689540 | 2.7525897  |
| O | 4.0946205  | -0.9845701 | -0.5520306 |
| O | -1.9933391 | -2.9203531 | -0.4234364 |
| O | 0.7194984  | -1.1896782 | -3.5864101 |
| O | 1.8461498  | -4.6510376 | -0.9406315 |

**3a<sup>-</sup>** : [W(CO)<sub>5</sub>]PPh<sub>2</sub>O<sup>-</sup> anion complex

35

Energy = -1514.717778749

|   |            |           |            |
|---|------------|-----------|------------|
| P | -1.8053423 | 1.3022845 | 0.5318951  |
| O | -0.3609220 | 1.4767187 | 0.9983027  |
| C | -2.8952709 | 1.4977340 | 2.0118512  |
| C | -2.2939972 | 2.8075512 | -0.4192431 |

|   |            |            |            |
|---|------------|------------|------------|
| C | -4.2867089 | 1.6417894  | 1.9330924  |
| C | -2.2899422 | 1.4381849  | 3.2721376  |
| C | -1.4832723 | 3.9442697  | -0.3039225 |
| C | -3.4233060 | 2.8617536  | -1.2441229 |
| C | -5.0577196 | 1.7249854  | 3.0913470  |
| H | -4.7724710 | 1.6950101  | 0.9630523  |
| C | -3.0603831 | 1.5164652  | 4.4350050  |
| H | -1.2094509 | 1.3324359  | 3.3204099  |
| C | -1.8052542 | 5.1172676  | -0.9882801 |
| H | -0.5968962 | 3.8866603  | 0.3226816  |
| C | -3.7533647 | 4.0350207  | -1.9232132 |
| H | -4.0404345 | 1.9764003  | -1.3703853 |
| C | -4.4461536 | 1.6587091  | 4.3477343  |
| H | -6.1362101 | 1.8416904  | 3.0171559  |
| H | -2.5785452 | 1.4663004  | 5.4086002  |
| C | -2.9445610 | 5.1670507  | -1.7959825 |
| H | -1.1669099 | 5.9925822  | -0.8943051 |
| H | -4.6336498 | 4.0633254  | -2.5604899 |
| H | -5.0482102 | 1.7184860  | 5.2507609  |
| H | -3.1949457 | 6.0789718  | -2.3318205 |
| W | -2.3655859 | -0.9252290 | -0.6751790 |
| C | -2.6494404 | -2.7151713 | -1.5530348 |
| C | -2.1284062 | 0.0344745  | -2.4745989 |
| C | -2.5595382 | -1.6952848 | 1.2204900  |
| C | -4.3835272 | -0.5774422 | -0.7258700 |
| C | -0.3293085 | -1.2380174 | -0.5943566 |
| O | -2.8120702 | -3.7549876 | -2.0607909 |
| O | -1.9834599 | 0.5901132  | -3.4826658 |
| O | -2.6650884 | -2.1056350 | 2.2993409  |
| O | -5.5338629 | -0.4119407 | -0.7658411 |
| O | 0.8129033  | -1.4149492 | -0.5498810 |

**3a<sup>\*</sup>** : [W(CO)<sub>5</sub>]PPh<sub>2</sub>O<sup>\*</sup> radical complex  
35

Energy = -1514.546146922

|   |            |           |            |
|---|------------|-----------|------------|
| P | -2.0568147 | 1.4039434 | 0.5816801  |
| O | -0.5657902 | 1.2745891 | 0.9287189  |
| C | -3.0809289 | 1.5642569 | 2.0710451  |
| C | -2.4195841 | 2.8504577 | -0.4444478 |
| C | -4.3566893 | 2.1444146 | 2.0426240  |
| C | -2.5832920 | 1.0258782 | 3.2671760  |
| C | -1.5126959 | 3.9198856 | -0.4415438 |
| C | -3.5699045 | 2.9100904 | -1.2435594 |
| C | -5.1271820 | 2.1839532 | 3.2038793  |
| H | -4.7443381 | 2.5749570 | 1.1246866  |
| C | -3.3555939 | 1.0760184 | 4.4256895  |
| H | -1.5912789 | 0.5848538 | 3.2845403  |
| C | -1.7683107 | 5.0458631 | -1.2228938 |
| H | -0.6141781 | 3.8618124 | 0.1655448  |
| C | -3.8241414 | 4.0415954 | -2.0157416 |
| H | -4.2600677 | 2.0712558 | -1.2750061 |

|   |            |            |            |
|---|------------|------------|------------|
| C | -4.6291267 | 1.6501236  | 4.3943722  |
| H | -6.1137509 | 2.6373160  | 3.1796537  |
| H | -2.9637305 | 0.6679139  | 5.3527300  |
| C | -2.9239545 | 5.1098182  | -2.0049035 |
| H | -1.0638511 | 5.8725011  | -1.2223850 |
| H | -4.7167384 | 4.0854580  | -2.6324776 |
| H | -5.2311450 | 1.6847140  | 5.2976901  |
| H | -3.1196861 | 5.9885749  | -2.6123022 |
| W | -2.0583086 | -0.8823661 | -0.5512878 |
| C | -2.5275279 | -2.5867698 | -1.5315254 |
| C | -2.0378530 | 0.1253988  | -2.3479536 |
| C | -2.0011350 | -1.8192274 | 1.2880196  |
| C | -4.0973821 | -0.6611915 | -0.3152258 |
| C | -0.0073420 | -1.2029482 | -0.7851600 |
| O | -2.8520844 | -3.5420656 | -2.0999527 |
| O | -2.0128063 | 0.6802660  | -3.3585567 |
| O | -1.9705969 | -2.3463704 | 2.3128147  |
| O | -5.2361718 | -0.5532467 | -0.1736095 |
| O | 1.1126756  | -1.4141457 | -0.9324588 |

**3bc<sup>\*</sup>** : [W(CO)<sub>5</sub>]PPh<sub>2</sub>S<sup>\*</sup> with a CO in ring  
35

Energy = -1837.490510998

|   |            |            |            |
|---|------------|------------|------------|
| P | -2.3647089 | 1.0651145  | 0.1584827  |
| C | -2.6054538 | 2.0425535  | 1.6659594  |
| C | -2.5421066 | 2.2829421  | -1.1785821 |
| S | -0.3492553 | 0.4098489  | 0.1235864  |
| C | -1.8502450 | 3.2073951  | 1.8792286  |
| C | -3.5470472 | 1.6375783  | 2.6187795  |
| C | -1.7956036 | 2.1689725  | -2.3586433 |
| C | -3.5301544 | 3.2735766  | -1.0697599 |
| C | -2.0319621 | 3.9474963  | 3.0434819  |
| H | -1.1257476 | 3.5313179  | 1.1372636  |
| C | -3.7335469 | 2.3890836  | 3.7798327  |
| H | -4.1362747 | 0.7417893  | 2.4508758  |
| C | -2.0268151 | 3.0477099  | -3.4152588 |
| H | -1.0311496 | 1.4026641  | -2.4448564 |
| C | -3.7609837 | 4.1440850  | -2.1336823 |
| H | -4.1112816 | 3.3687838  | -0.1573287 |
| C | -2.9742284 | 3.5393967  | 3.9935727  |
| H | -1.4415711 | 4.8433226  | 3.2105148  |
| H | -4.4690175 | 2.0746723  | 4.5139575  |
| C | -3.0093086 | 4.0341425  | -3.3054327 |
| H | -1.4378926 | 2.9621773  | -4.3235322 |
| H | -4.5243012 | 4.9112060  | -2.0438898 |
| H | -3.1156765 | 4.1215511  | 4.8993147  |
| H | -3.1872021 | 4.7175761  | -4.1304341 |
| W | -3.3299604 | -1.2868342 | -0.1454721 |
| C | -4.0523241 | -3.1782957 | -0.4380356 |
| C | -3.3001625 | -0.9863635 | -2.1789111 |
| C | -3.2053015 | -1.6825184 | 1.8670842  |

|   |            |            |            |
|---|------------|------------|------------|
| C | -5.1103942 | -0.3317156 | 0.0278246  |
| C | -1.1156586 | -1.2598688 | -0.1424689 |
| O | -4.5020084 | -4.2322968 | -0.6002646 |
| O | -3.2776783 | -0.8312920 | -3.3235280 |
| O | -3.1104138 | -1.9340986 | 2.9914810  |
| O | -6.0818429 | 0.2921756  | 0.1290716  |
| O | -0.4475783 | -2.2558317 | -0.2953444 |

**3be<sub>ts</sub>** : P-to-S 1,2-W-shift of [W(CO)<sub>5</sub>]PPh<sub>2</sub>S\*

35

Energy = -1837.519659941

|   |            |            |            |
|---|------------|------------|------------|
| P | -1.3070356 | -0.0990545 | 0.6346581  |
| C | -2.0130923 | -1.7531328 | 0.3970864  |
| C | -2.6031866 | 1.0962327  | 0.1942232  |
| S | -0.5492311 | 0.1983689  | 2.4728213  |
| C | -2.4077787 | -2.5222090 | 1.4984654  |
| C | -2.1213399 | -2.2806449 | -0.8988201 |
| C | -2.5001593 | 2.4092121  | 0.6768191  |
| C | -3.6708082 | 0.7429951  | -0.6425490 |
| C | -2.9264248 | -3.8014785 | 1.3010633  |
| H | -2.3033242 | -2.1184591 | 2.5013950  |
| C | -2.6266811 | -3.5652326 | -1.0885164 |
| H | -1.7900032 | -1.7021850 | -1.7563636 |
| C | -3.4509801 | 3.3601028  | 0.3160815  |
| H | -1.6896417 | 2.6716200  | 1.3499523  |
| C | -4.6100864 | 1.7056164  | -1.0134823 |
| H | -3.7732446 | -0.2753953 | -1.0030764 |
| C | -3.0391464 | -4.3223629 | 0.0103393  |
| H | -3.2351385 | -4.3940472 | 2.1572240  |
| H | -2.7041174 | -3.9708984 | -2.0927550 |
| C | -4.5024688 | 3.0127497  | -0.5367388 |
| H | -3.3705557 | 4.3730439  | 0.6992445  |
| H | -5.4350042 | 1.4265527  | -1.6624204 |
| H | -3.4334461 | -5.3231847 | -0.1387555 |
| H | -5.2398867 | 3.7574755  | -0.8213465 |
| W | 1.1237552  | 0.2614302  | -0.0927520 |
| C | 2.8390566  | 0.3988056  | -1.1446446 |
| C | 0.3233667  | 0.1523900  | -1.9928006 |
| C | 2.3666229  | 0.4625255  | 1.5752727  |
| C | 1.2966484  | -1.7927873 | 0.0424368  |
| C | 0.8565922  | 2.3043408  | -0.1114700 |
| O | 3.7793382  | 0.4617900  | -1.8232472 |
| O | -0.0253162 | 0.1193250  | -3.0923612 |
| O | 3.1464781  | 0.5903916  | 2.4113645  |
| O | 1.3852962  | -2.9381364 | 0.1284318  |
| O | 0.7217809  | 3.4497730  | -0.1232631 |

**3be\*** : PPh<sub>2</sub>S[W(CO)<sub>5</sub>]\* radical complex

35

Energy = -1837.517676280

|   |            |           |            |
|---|------------|-----------|------------|
| P | -1.5522508 | 1.0401448 | -0.6442798 |
|---|------------|-----------|------------|

|   |            |            |            |
|---|------------|------------|------------|
| C | -2.2527745 | -0.6432280 | -0.6908519 |
| C | -2.8902608 | 2.0745315  | 0.0345502  |
| S | -0.0911775 | 1.0562390  | 0.8303292  |
| C | -2.8319988 | -1.2208623 | 0.4509331  |
| C | -2.2132940 | -1.3607755 | -1.8929122 |
| C | -2.5835336 | 3.2721361  | 0.7003534  |
| C | -4.2336382 | 1.7445598  | -0.2072817 |
| C | -3.3685481 | -2.5027410 | 0.3822252  |
| H | -2.8581328 | -0.6650385 | 1.3835436  |
| C | -2.7495154 | -2.6483991 | -1.9542517 |
| H | -1.7679693 | -0.9121844 | -2.7759694 |
| C | -3.6057471 | 4.1073879  | 1.1453992  |
| H | -1.5466554 | 3.5419749  | 0.8805185  |
| C | -5.2517606 | 2.5888722  | 0.2347740  |
| H | -4.4835095 | 0.8260852  | -0.7293515 |
| C | -3.3269169 | -3.2173165 | -0.8193589 |
| H | -3.8134300 | -2.9493347 | 1.2667262  |
| H | -2.7160256 | -3.2032462 | -2.8871453 |
| C | -4.9419628 | 3.7685900  | 0.9141261  |
| H | -3.3587737 | 5.0245643  | 1.6722780  |
| H | -6.2881729 | 2.3206200  | 0.0508968  |
| H | -3.7425606 | -4.2195854 | -0.8670223 |
| H | -5.7369427 | 4.4230226  | 1.2595143  |
| W | 1.6866946  | -0.6044221 | 0.2829778  |
| C | 3.2572398  | -1.8204284 | -0.0862622 |
| C | 1.3024045  | -0.4985668 | -1.7418777 |
| C | 2.0646938  | -0.7157646 | 2.3147450  |
| C | 0.5028197  | -2.3073753 | 0.3601786  |
| C | 3.0019676  | 0.9904239  | 0.1744162  |
| O | 4.1629217  | -2.5132935 | -0.3028584 |
| O | 1.1158796  | -0.4579919 | -2.8799541 |
| O | 2.2953188  | -0.7883609 | 3.4414169  |
| O | -0.0595846 | -3.3122853 | 0.3907124  |
| O | 3.7661312  | 1.8507821  | 0.1095784  |

**3bT** : [W(CO)<sub>5</sub>]PPh<sub>2</sub>ST complex

63

Energy = -2246.353554066

|   |            |           |            |
|---|------------|-----------|------------|
| P | 0.4939817  | 1.0469882 | 0.0258316  |
| S | -1.5015166 | 1.8137480 | -0.1761500 |
| C | 1.3086196  | 2.2069708 | -1.1437847 |
| C | 1.0776326  | 1.7218267 | 1.6348606  |
| N | -2.5850665 | 0.5003603 | 0.0107167  |
| C | 2.4780507  | 2.8911903 | -0.7846750 |
| C | 0.8081710  | 2.3431427 | -2.4470582 |
| C | 2.1310839  | 1.1033670 | 2.3173432  |
| C | 0.5271278  | 2.9014574 | 2.1581772  |
| C | -3.5081053 | 0.3785838 | -1.1892633 |
| C | -3.1453083 | 0.3733782 | 1.4124611  |
| C | 3.1374674  | 3.6917754 | -1.7178075 |
| H | 2.8749490  | 2.7994943 | 0.2209577  |

|   |            |            |            |
|---|------------|------------|------------|
| C | 1.4662545  | 3.1472376  | -3.3744947 |
| H | -0.1009881 | 1.8239511  | -2.7298484 |
| C | 2.6200001  | 1.6432014  | 3.5081812  |
| H | 2.5811576  | 0.2019240  | 1.9167351  |
| C | 1.0104402  | 3.4363705  | 3.3498220  |
| H | -0.2895893 | 3.3925378  | 1.6379400  |
| C | -4.4281037 | -0.8410394 | -0.9883883 |
| C | -2.6522426 | 0.1162399  | -2.4340502 |
| C | -4.3514601 | 1.6454215  | -1.4339002 |
| C | -4.0673118 | -0.8591677 | 1.4602389  |
| C | -3.8940998 | 1.6297172  | 1.8941752  |
| C | -1.9680017 | 0.1150546  | 2.3585937  |
| C | 2.6342545  | 3.8229161  | -3.0125977 |
| H | 4.0441694  | 4.2154721  | -1.4290248 |
| H | 1.0661479  | 3.2471941  | -4.3793005 |
| C | 2.0573240  | 2.8076477  | 4.0294432  |
| H | 3.4372839  | 1.1499762  | 4.0258823  |
| H | 0.5696387  | 4.3456520  | 3.7483247  |
| C | -5.1278725 | -0.8590193 | 0.3655909  |
| H | -3.8287432 | -1.7517412 | -1.0903556 |
| H | -5.1544813 | -0.8348232 | -1.8093402 |
| H | -2.0885358 | 1.0043765  | -2.7292583 |
| H | -1.9514173 | -0.7012324 | -2.2514401 |
| H | -3.3084484 | -0.1615419 | -3.2652852 |
| H | -3.7073460 | 2.5288676  | -1.5003334 |
| H | -5.0894599 | 1.8133333  | -0.6469017 |
| H | -4.8865414 | 1.5454559  | -2.3845242 |
| H | -3.4501157 | -1.7595930 | 1.3585915  |
| H | -4.5238766 | -0.8869119 | 2.4564275  |
| H | -3.2707527 | 2.5189227  | 1.7538663  |
| H | -4.8398128 | 1.7804258  | 1.3695233  |
| H | -4.1122499 | 1.5323608  | 2.9632270  |
| H | -1.3421890 | -0.6958145 | 1.9741157  |
| H | -1.3485403 | 1.0062989  | 2.4851110  |
| H | -2.3514250 | -0.1728365 | 3.3430482  |
| H | 3.1472872  | 4.4499285  | -3.7359929 |
| H | 2.4316222  | 3.2250869  | 4.9596813  |
| H | -5.7551516 | -1.7537070 | 0.4498493  |
| H | -5.7956268 | 0.0047593  | 0.4712904  |
| W | 1.0859108  | -1.3830363 | -0.4823900 |
| C | 1.2266516  | -1.8817746 | 1.5106252  |
| C | 3.0191100  | -0.6836883 | -0.5606100 |
| C | -0.7835649 | -2.2575861 | -0.4071551 |
| C | 0.8515480  | -0.9954225 | -2.4921790 |
| C | 1.8028382  | -3.2087552 | -0.9473683 |
| O | 1.2737485  | -2.2249326 | 2.6139863  |
| O | 4.1169356  | -0.3245536 | -0.6187448 |
| O | -1.7451465 | -2.8971776 | -0.3590067 |
| O | 0.7275234  | -0.8332472 | -3.6297265 |
| O | 2.2382488  | -4.2508349 | -1.2168533 |

**3b<sup>-</sup>** : [W(CO)<sub>5</sub>]PPh<sub>2</sub>S<sup>-</sup> anion complex  
35

Energy = -1837.685095582

|   |            |            |            |
|---|------------|------------|------------|
| P | -1.7544636 | 1.3414072  | 0.5349306  |
| S | 0.1524994  | 1.5669046  | 1.1464891  |
| C | -2.8548798 | 1.5293213  | 2.0134227  |
| C | -2.2542044 | 2.8436490  | -0.4220046 |
| C | -4.2145010 | 1.8403157  | 1.8715262  |
| C | -2.3460302 | 1.2812229  | 3.2923814  |
| C | -1.5653755 | 4.0486478  | -0.2383045 |
| C | -3.3316589 | 2.8086152  | -1.3147804 |
| C | -5.0469743 | 1.9033270  | 2.9880291  |
| H | -4.6260463 | 2.0432742  | 0.8875180  |
| C | -3.1806082 | 1.3364396  | 4.4105599  |
| H | -1.2879547 | 1.0535615  | 3.3947532  |
| C | -1.9563447 | 5.1987107  | -0.9236264 |
| H | -0.7143470 | 4.0616305  | 0.4388030  |
| C | -3.7266024 | 3.9582618  | -2.0010208 |
| H | -3.8586315 | 1.8740564  | -1.4838563 |
| C | -4.5331725 | 1.6476849  | 4.2627136  |
| H | -6.0974216 | 2.1537688  | 2.8636378  |
| H | -2.7716930 | 1.1392628  | 5.3984790  |
| C | -3.0398556 | 5.1575964  | -1.8057976 |
| H | -1.4119129 | 6.1277858  | -0.7738798 |
| H | -4.5629802 | 3.9137298  | -2.6937034 |
| H | -5.1830708 | 1.6941987  | 5.1326141  |
| H | -3.3399710 | 6.0522619  | -2.3449396 |
| W | -2.3285881 | -0.9114969 | -0.6263127 |
| C | -2.7070688 | -2.7032788 | -1.4531509 |
| C | -2.1605478 | -0.0347121 | -2.4761298 |
| C | -2.4171415 | -1.6822454 | 1.2799491  |
| C | -4.3447021 | -0.5454822 | -0.5716529 |
| C | -0.3031193 | -1.3110595 | -0.6822666 |
| O | -2.9361617 | -3.7428684 | -1.9341237 |
| O | -2.0462487 | 0.4514279  | -3.5226099 |
| O | -2.4576393 | -2.1125183 | 2.3540363  |
| O | -5.4943964 | -0.3809403 | -0.5551145 |
| O | 0.8205086  | -1.5748819 | -0.7366950 |

**3b<sup>•</sup>** : [W(CO)<sub>5</sub>]PPh<sub>2</sub>S<sup>•</sup> radical complex  
35

Energy = -1837.523255181

|   |            |           |            |
|---|------------|-----------|------------|
| P | -2.0395455 | 1.3894178 | 0.5274457  |
| S | -0.0711370 | 1.1712395 | 0.8784103  |
| C | -2.9994632 | 1.5852672 | 2.0616645  |
| C | -2.4273796 | 2.8673813 | -0.4554827 |
| C | -4.2868579 | 2.1395725 | 2.0125645  |
| C | -2.4901211 | 1.1063374 | 3.2750453  |
| C | -1.7161053 | 4.0551881 | -0.2350323 |
| C | -3.4516437 | 2.8343027 | -1.4095408 |
| C | -5.0564381 | 2.2101330 | 3.1728080  |

|   |            |            |            |
|---|------------|------------|------------|
| H | -4.6839749 | 2.5226748  | 1.0772713  |
| C | -3.2633951 | 1.1847221  | 4.4319910  |
| H | -1.4890720 | 0.6862422  | 3.3067326  |
| C | -2.0334796 | 5.1986554  | -0.9645214 |
| H | -0.9136787 | 4.0772046  | 0.4970255  |
| C | -3.7696022 | 3.9831858  | -2.1337852 |
| H | -3.9963412 | 1.9128933  | -1.5927899 |
| C | -4.5472201 | 1.7327906  | 4.3824449  |
| H | -6.0518989 | 2.6422381  | 3.1318083  |
| H | -2.8615015 | 0.8203418  | 5.3728392  |
| C | -3.0606809 | 5.1645020  | -1.9118540 |
| H | -1.4777090 | 6.1162685  | -0.7956660 |
| H | -4.5639048 | 3.9522302  | -2.8734274 |
| H | -5.1481164 | 1.7917441  | 5.2851911  |
| H | -3.3035985 | 6.0573328  | -2.4803583 |
| W | -2.0893874 | -0.9108099 | -0.5750405 |
| C | -2.5846524 | -2.6473921 | -1.4870286 |
| C | -1.8956310 | 0.0377491  | -2.3944923 |
| C | -2.1641641 | -1.7642632 | 1.3024602  |
| C | -4.1352706 | -0.6298403 | -0.5074837 |
| C | -0.0953706 | -1.5077876 | -0.7483943 |
| O | -2.9391336 | -3.6170465 | -2.0135947 |
| O | -1.7626988 | 0.5632717  | -3.4123760 |
| O | -2.1954825 | -2.2396555 | 2.3519158  |
| O | -5.2837283 | -0.5329889 | -0.4793577 |
| O | 0.9670793  | -1.9255246 | -0.8875179 |

**3cc\_ts** : N-C cyclization of [W(CO)<sub>5</sub>]PPh<sub>2</sub>NMe<sup>•</sup>  
39

Energy = -1533.954602938

|   |            |           |            |
|---|------------|-----------|------------|
| P | 0.2090399  | 1.0618234 | 0.0036682  |
| C | -0.0345911 | 2.2119410 | 1.3801933  |
| C | -0.0038727 | 2.0789369 | -1.4830336 |
| N | 1.8444399  | 0.5393108 | -0.0386994 |
| C | 0.4520706  | 3.5277486 | 1.3113090  |
| C | -0.6846381 | 1.7709145 | 2.5404826  |
| C | 0.9479567  | 2.0567878 | -2.5091201 |
| C | -1.1840415 | 2.8212712 | -1.6364864 |
| C | 2.8150743  | 0.9204152 | 0.9873913  |
| C | 0.3050128  | 4.3806179 | 2.4020716  |
| H | 0.9382720  | 3.8801937 | 0.4062325  |
| C | -0.8345563 | 2.6298716 | 3.6286450  |
| H | -1.0796641 | 0.7602587 | 2.5799156  |
| C | 0.7254440  | 2.7873618 | -3.6767695 |
| H | 1.8563384  | 1.4751215 | -2.3860062 |
| C | -1.4014044 | 3.5458297 | -2.8063345 |
| H | -1.9266271 | 2.8385883 | -0.8428725 |
| H | 2.4587491  | 0.7317148 | 2.0078440  |
| H | 3.7300001  | 0.3499816 | 0.8083195  |
| H | 3.0316201  | 1.9901924 | 0.8915061  |
| C | -0.3365389 | 3.9320773 | 3.5605712  |

|   |            |            |            |
|---|------------|------------|------------|
| H | 0.6866907  | 5.3958580  | 2.3487782  |
| H | -1.3440765 | 2.2859059  | 4.5236344  |
| C | -0.4466456 | 3.5302645  | -3.8270418 |
| H | 1.4690631  | 2.7751525  | -4.4683006 |
| H | -2.3143470 | 4.1227567  | -2.9211101 |
| H | -0.4543045 | 4.6019867  | 4.4072421  |
| H | -0.6179420 | 4.0964034  | -4.7379631 |
| W | -0.2327227 | -1.3883445 | 0.0583024  |
| C | -0.0881679 | -3.4121432 | -0.0595267 |
| C | -0.6435858 | -1.2337926 | -1.9565152 |
| C | 0.1711580  | -1.5665547 | 2.0661423  |
| C | -2.2372371 | -1.5100295 | 0.4768708  |
| C | 1.8733844  | -1.1734337 | -0.4248942 |
| O | 0.0291399  | -4.5622158 | -0.1383509 |
| O | -0.8734599 | -1.1437782 | -3.0843477 |
| O | 0.3925573  | -1.7037199 | 3.1942723  |
| O | -3.3708379 | -1.5752376 | 0.7092379  |
| O | 2.9526771  | -1.5765201 | -0.6929077 |

**3cc\_ts** : 1,2-W-shift of [W(CO)<sub>5</sub>]PPh<sub>2</sub>NMe<sup>•</sup>  
39

Energy = -1533.963091910

|   |            |            |            |
|---|------------|------------|------------|
| P | 0.1085283  | 1.2947044  | -0.2273837 |
| C | -0.2176552 | 2.7643909  | 0.7816579  |
| C | 0.3145195  | 1.8460537  | -1.9346226 |
| N | 1.3931770  | 0.4147086  | 0.2590653  |
| C | 0.1775351  | 4.0464620  | 0.3661126  |
| C | -0.8119867 | 2.5992328  | 2.0426658  |
| C | 1.4291576  | 1.4169664  | -2.6692965 |
| C | -0.6881842 | 2.6055975  | -2.5603483 |
| C | 2.3885040  | 0.8486529  | 1.2396933  |
| C | -0.0165912 | 5.1416102  | 1.2063578  |
| H | 0.6394537  | 4.1836499  | -0.6065182 |
| C | -0.9957350 | 3.6958318  | 2.8819981  |
| H | -1.1352562 | 1.6128533  | 2.3616508  |
| C | 1.5530063  | 1.7720011  | -4.0117779 |
| H | 2.1837753  | 0.8112455  | -2.1760283 |
| C | -0.5549324 | 2.9597161  | -3.9001926 |
| H | -1.5626217 | 2.9245468  | -1.9987061 |
| H | 3.0089736  | -0.0092108 | 1.5151970  |
| H | 3.0381887  | 1.6176998  | 0.8036982  |
| H | 1.9408255  | 1.2561910  | 2.1574669  |
| C | -0.6004233 | 4.9685416  | 2.4636814  |
| H | 0.2933587  | 6.1304196  | 0.8807916  |
| H | -1.4553859 | 3.5592391  | 3.8561169  |
| C | 0.5649630  | 2.5436278  | -4.6278151 |
| H | 2.4218460  | 1.4471067  | -4.5771828 |
| H | -1.3256216 | 3.5564126  | -4.3795070 |
| H | -0.7507951 | 5.8246657  | 3.1147686  |
| H | 0.6630608  | 2.8170799  | -5.6743769 |
| W | -0.1651416 | -1.2279773 | 0.6036167  |

|   |            |            |            |
|---|------------|------------|------------|
| C | -1.0508940 | -3.0057643 | 0.9416296  |
| C | -0.2917089 | -1.5834413 | -1.4320085 |
| C | -0.0407764 | -0.9077448 | 2.6371706  |
| C | -2.1147871 | -0.5585202 | 0.6925780  |
| C | 1.5651346  | -2.4055607 | 0.6926246  |
| O | -1.5159159 | -4.0517925 | 1.1639853  |
| O | -0.3845653 | -1.8102280 | -2.5585737 |
| O | -0.0045182 | -0.7856896 | 3.7858843  |
| O | -3.2333397 | -0.2773117 | 0.7748614  |
| O | 2.4125056  | -3.1829831 | 0.7868782  |

**3ce<sup>•</sup>** : PPh<sub>2</sub>NMe[W(CO)<sub>5</sub>]<sup>•</sup> radical complex  
39

Energy = -1533.974862187

|   |            |            |            |
|---|------------|------------|------------|
| P | -1.5490081 | -0.5782738 | -0.6202361 |
| C | -2.9194560 | -1.5395703 | 0.1179637  |
| C | -2.1528240 | 1.1434483  | -0.5443028 |
| N | -0.2815570 | -0.5874370 | 0.5228323  |
| C | -4.0083598 | -0.9628362 | 0.7887995  |
| C | -2.8644787 | -2.9366720 | -0.0246671 |
| C | -2.0255658 | 1.9259063  | 0.6137346  |
| C | -2.7553728 | 1.6883233  | -1.6855393 |
| C | -0.3694682 | -1.4479165 | 1.7072082  |
| C | -5.0103880 | -1.7719200 | 1.3246923  |
| H | -4.0707074 | 0.1160898  | 0.8933589  |
| C | -3.8611167 | -3.7433736 | 0.5208602  |
| H | -2.0364595 | -3.3902360 | -0.5648378 |
| C | -2.4966287 | 3.2366370  | 0.6256375  |
| H | -1.5491782 | 1.5088895  | 1.4955399  |
| C | -3.2353946 | 2.9977900  | -1.6665357 |
| H | -2.8388838 | 1.0908406  | -2.5898383 |
| H | -1.3784794 | -1.4437692 | 2.1318809  |
| H | -0.1133686 | -2.4861824 | 1.4565327  |
| H | 0.3460441  | -1.0948603 | 2.4532276  |
| C | -4.9364202 | -3.1607874 | 1.1964743  |
| H | -5.8488996 | -1.3176552 | 1.8447550  |
| H | -3.8048905 | -4.8225240 | 0.4110541  |
| C | -3.1019616 | 3.7739568  | -0.5136978 |
| H | -2.3926338 | 3.8397256  | 1.5232075  |
| H | -3.6992251 | 3.4160095  | -2.5551790 |
| H | -5.7188906 | -3.7873079 | 1.6148816  |
| H | -3.4633881 | 4.7981760  | -0.5038902 |
| W | 1.5841520  | 0.4006710  | -0.0191893 |
| C | 3.3896043  | 1.2041251  | -0.4829663 |
| C | 0.7815660  | 2.0379665  | -0.9945957 |
| C | 2.6676310  | -1.1153595 | 0.8664176  |
| C | 1.5754352  | -0.5789856 | -1.8413910 |
| C | 1.5645834  | 1.4172013  | 1.7776206  |
| O | 4.4284085  | 1.6510118  | -0.7422529 |
| O | 0.4747148  | 2.9886332  | -1.5756351 |
| O | 3.3580065  | -1.9175257 | 1.3328353  |

|   |           |            |            |
|---|-----------|------------|------------|
| O | 1.5971127 | -1.1038338 | -2.8691897 |
| O | 1.5721079 | 2.0050659  | 2.7727810  |

**3cT** : [W(CO)<sub>5</sub>]PPh<sub>2</sub>NMeT complex  
67

Energy = -1942.798756865

|   |            |            |            |
|---|------------|------------|------------|
| P | 0.0392015  | 1.0396228  | -0.0234675 |
| C | 0.5964682  | 2.1291963  | -1.4060069 |
| C | 0.7740788  | 1.9643411  | 1.3917017  |
| N | -2.5586504 | 0.2505113  | 0.1024658  |
| C | 0.8471591  | 3.4966894  | -1.2118687 |
| C | 0.7537922  | 1.5973250  | -2.6926183 |
| C | 0.0049789  | 2.4505956  | 2.4536047  |
| C | 2.1652693  | 2.1474576  | 1.4312641  |
| C | -3.3537018 | 0.1718445  | -1.1720877 |
| C | -3.2218723 | -0.0343413 | 1.4260040  |
| C | 1.2417552  | 4.3059169  | -2.2758855 |
| H | 0.7448284  | 3.9310752  | -0.2223736 |
| C | 1.1486929  | 2.4033928  | -3.7589726 |
| H | 0.5687759  | 0.5439310  | -2.8611750 |
| C | 0.6090687  | 3.0848677  | 3.5410895  |
| H | -1.0731128 | 2.3394671  | 2.4288526  |
| C | 2.7704654  | 2.7764681  | 2.5157853  |
| H | 2.7803049  | 1.8108194  | 0.6039405  |
| C | -4.0966488 | -1.1771882 | -1.1701909 |
| C | -2.3595316 | 0.1740158  | -2.3338587 |
| C | -4.3991096 | 1.2894071  | -1.4362788 |
| C | -4.1124651 | -1.2914514 | 1.2926455  |
| C | -4.0433797 | 1.1368627  | 2.0079379  |
| C | -2.1371242 | -0.3942144 | 2.4512611  |
| C | 1.3951288  | 3.7615382  | -3.5526249 |
| H | 1.4333323  | 5.3616946  | -2.1059806 |
| H | 1.2702711  | 1.9688785  | -4.7470682 |
| C | 1.9935887  | 3.2422720  | 3.5798496  |
| H | -0.0066206 | 3.4562509  | 4.3554575  |
| H | 3.8489285  | 2.9058885  | 2.5290263  |
| C | -4.9959123 | -1.3243241 | 0.0520932  |
| H | -3.3594679 | -1.9878861 | -1.1762660 |
| H | -4.6715589 | -1.2443486 | -2.1008613 |
| H | -1.8644338 | 1.1431033  | -2.4413900 |
| H | -1.5976282 | -0.5939303 | -2.1771286 |
| H | -2.8880571 | -0.0376285 | -3.2690376 |
| H | -5.0844559 | 1.4381826  | -0.6004581 |
| H | -4.9971563 | 0.9926868  | -2.3054169 |
| H | -3.9325830 | 2.2454000  | -1.6745168 |
| H | -3.4583784 | -2.1687690 | 1.2654824  |
| H | -4.7094138 | -1.3639227 | 2.2091528  |
| H | -3.4074569 | 2.0049545  | 2.2039024  |
| H | -4.8649360 | 1.4456487  | 1.3573925  |
| H | -4.4737673 | 0.8245437  | 2.9657288  |
| H | -2.6173245 | -0.6686835 | 3.3967973  |

|   |            |            |            |
|---|------------|------------|------------|
| H | -1.5488094 | -1.2447768 | 2.1036215  |
| H | -1.4577051 | 0.4348374  | 2.6461228  |
| H | 1.7096694  | 4.3911948  | -4.3799745 |
| H | 2.4652276  | 3.7302945  | 4.4278536  |
| H | -5.5430038 | -2.2735029 | 0.0132472  |
| H | -5.7477194 | -0.5262248 | 0.0777647  |
| W | 1.0472032  | -1.3425880 | -0.1242033 |
| C | 2.8250671  | -0.4333977 | -0.5994199 |
| C | 0.7887222  | -1.7198736 | -2.1290712 |
| C | 1.3123268  | -1.1183674 | 1.9124526  |
| C | -0.6491776 | -2.4850070 | 0.1259853  |
| C | 2.0767251  | -3.0655214 | -0.0111525 |
| O | 3.8483692  | -0.0007043 | -0.9271791 |
| O | 0.6710732  | -2.0235476 | -3.2397540 |
| O | 1.4718913  | -1.0439409 | 3.0535733  |
| O | -1.5082387 | -3.2563731 | 0.1958179  |
| O | 2.6896878  | -4.0499461 | 0.0720371  |
| N | -1.6375114 | 1.3283935  | 0.1756483  |
| C | -2.0823297 | 2.7191327  | -0.0505493 |
| H | -1.4250968 | 3.3971956  | 0.5010757  |
| H | -2.0487486 | 3.0004781  | -1.1100317 |
| H | -3.0959599 | 2.8404073  | 0.3239036  |

**3c<sup>-</sup>** : [W(CO)<sub>5</sub>]PPh<sub>2</sub>NMe<sup>-</sup> anion complex  
39

Energy = -1534.117410267

|   |            |            |            |
|---|------------|------------|------------|
| P | -1.9170225 | 1.1918280  | 0.1177586  |
| C | -2.5207759 | 2.2120087  | 1.5489571  |
| C | -2.3081899 | 2.3171208  | -1.2679516 |
| N | -0.3037869 | 1.1370787  | 0.1225560  |
| C | -2.2534577 | 3.5911527  | 1.5720164  |
| C | -3.0958500 | 1.6278325  | 2.6822821  |
| C | -1.3338131 | 2.5975498  | -2.2297383 |
| C | -3.5941018 | 2.8531944  | -1.4163592 |
| C | 0.3218052  | 0.1982865  | 1.0355663  |
| C | -2.5760908 | 4.3634403  | 2.6858058  |
| H | -1.7940053 | 4.0587038  | 0.7046647  |
| C | -3.4115790 | 2.3943649  | 3.8070881  |
| H | -3.3071520 | 0.5627492  | 2.6815093  |
| C | -1.6407729 | 3.4026755  | -3.3296530 |
| H | -0.3437130 | 2.1752198  | -2.0846030 |
| C | -3.9015389 | 3.6576893  | -2.5114401 |
| H | -4.3550006 | 2.6392723  | -0.6693760 |
| H | -0.1257765 | -0.8148715 | 0.9949294  |
| H | 1.3848724  | 0.0910988  | 0.7791981  |
| H | 0.2752294  | 0.5108742  | 2.0966390  |
| C | -3.1576123 | 3.7660546  | 3.8100338  |
| H | -2.3762062 | 5.4324132  | 2.6805944  |
| H | -3.8600195 | 1.9207020  | 4.6769872  |
| C | -2.9243289 | 3.9328147  | -3.4736727 |
| H | -0.8776179 | 3.6171000  | -4.0741382 |

|   |            |            |            |
|---|------------|------------|------------|
| H | -4.9019370 | 4.0694414  | -2.6182126 |
| H | -3.4092057 | 4.3676860  | 4.6796327  |
| H | -3.1647573 | 4.5571416  | -4.3304815 |
| W | -3.2670914 | -1.0415384 | -0.1783214 |
| C | -4.2796825 | -2.7509261 | -0.4544202 |
| C | -3.7780691 | -0.4007463 | -2.0629432 |
| C | -2.6643664 | -1.6843703 | 1.6774753  |
| C | -4.9285715 | -0.0924047 | 0.5612231  |
| C | -1.5574616 | -1.8333788 | -1.0034022 |
| O | -4.8798156 | -3.7435207 | -0.6060904 |
| O | -4.0634092 | -0.0797085 | -3.1402939 |
| O | -2.3297418 | -2.0851690 | 2.7165081  |
| O | -5.8772009 | 0.4564931  | 0.9459458  |
| O | -0.6094468 | -2.2717534 | -1.5068087 |

**3c<sup>•</sup>** : [W(CO)<sub>5</sub>]PPh<sub>2</sub>NMe<sup>•</sup> radical complex  
39

Energy = -1533.976791765

|   |            |            |            |
|---|------------|------------|------------|
| P | -2.1371392 | 1.1897532  | 0.0793659  |
| C | -2.5269866 | 2.1875707  | 1.5544432  |
| C | -2.3964377 | 2.3246261  | -1.3138931 |
| N | -0.4973234 | 0.8730961  | 0.0379028  |
| C | -2.1176808 | 3.5307518  | 1.5986041  |
| C | -3.1455599 | 1.6179565  | 2.6734206  |
| C | -1.4297793 | 2.4789168  | -2.3135009 |
| C | -3.6303592 | 2.9810474  | -1.4244776 |
| C | 0.1807912  | 0.4378892  | 1.2423029  |
| C | -2.3332582 | 4.2885174  | 2.7468500  |
| H | -1.6396302 | 3.9797667  | 0.7328158  |
| C | -3.3581145 | 2.3786200  | 3.8235799  |
| H | -3.4680990 | 0.5823905  | 2.6424461  |
| C | -1.6965433 | 3.2952772  | -3.4137883 |
| H | -0.4802097 | 1.9622208  | -2.2213808 |
| C | -3.8896526 | 3.7957345  | -2.5239956 |
| H | -4.3847955 | 2.8583463  | -0.6513648 |
| H | 0.3953807  | -0.6380555 | 1.1642534  |
| H | 1.1551654  | 0.9409171  | 1.2798922  |
| H | -0.3610109 | 0.6254988  | 2.1782492  |
| C | -2.9533672 | 3.7133964  | 3.8601601  |
| H | -2.0200644 | 5.3281083  | 2.7736559  |
| H | -3.8418906 | 1.9302556  | 4.6862107  |
| C | -2.9229215 | 3.9530878  | -3.5208746 |
| H | -0.9433532 | 3.4174192  | -4.1869849 |
| H | -4.8449391 | 4.3061852  | -2.6038463 |
| H | -3.1221901 | 4.3073942  | 4.7535955  |
| H | -3.1269196 | 4.5868762  | -4.3790388 |
| W | -3.2520344 | -1.0754136 | -0.2463174 |
| C | -4.2387258 | -2.8200244 | -0.5239569 |
| C | -3.7960628 | -0.4581908 | -2.1386475 |
| C | -2.6402526 | -1.6971798 | 1.6165538  |
| C | -4.9806725 | -0.2544083 | 0.5154370  |



C -1.5256662 -1.8755054 -1.0576325  
 O -4.8201939 -3.8123752 -0.6752633  
 O -4.0944369 -0.1268246 -3.2028046  
 O -2.2862441 -2.0720482 2.6525370  
 O -5.9592039 0.2055955 0.9236330  
 O -0.5768794 -2.3435905 -1.5186757

**3dc\*** : [W(CO)<sub>5</sub>]PPh<sub>2</sub>PMe\* with a CO in ring  
 39

Energy = -1820.578219880  
 P -2.5122733 1.0928656 0.3118358  
 C -2.8743810 2.0869458 1.7893399  
 C -2.4968342 2.2650652 -1.0820194  
 P -0.4748841 0.3123459 0.6416461  
 C -2.0776263 3.1970476 2.1161035  
 C -3.9152896 1.7077938 2.6446383  
 C -1.9469005 1.8537304 -2.3064882  
 C -3.0859523 3.5329722 -0.9833569  
 C 0.7907995 1.2490235 -0.3256887  
 C -2.3275820 3.9173607 3.2809135  
 H -1.2657845 3.4983701 1.4593924  
 C -4.1649127 2.4338532 3.8103757  
 H -4.5240196 0.8428505 2.4036731  
 C -1.9721124 2.7029276 -3.4090693  
 H -1.5089772 0.8637974 -2.4013500  
 C -3.1151946 4.3774844 -2.0939967  
 H -3.5267283 3.8586829 -0.0469840  
 H 1.1020212 2.1111047 0.2719379  
 H 1.6545769 0.5896984 -0.4566514  
 H 0.4267257 1.5845652 -1.2987607  
 C -3.3729050 3.5369816 4.1284956  
 H -1.7064621 4.7726176 3.5298510  
 H -4.9751020 2.1346618 4.4684913  
 C -2.5557425 3.9683085 -3.3047800  
 H -1.5414098 2.3749824 -4.3501658  
 H -3.5781995 5.3562925 -2.0094173  
 H -3.5655158 4.0999547 5.0369777  
 H -2.5781309 4.6291516 -4.1661935  
 W -3.3619331 -1.2838852 -0.0892676  
 C -3.8635160 -3.2226704 -0.4043456  
 C -3.7174575 -0.9099085 -2.0791266  
 C -2.9993598 -1.7407811 1.8819241  
 C -5.2156101 -0.6345455 0.3346776  
 C -1.1250585 -1.0922149 -0.3891049  
 O -4.1814558 -4.3276562 -0.5700792  
 O -3.9488898 -0.7262499 -3.1979910  
 O -2.8057116 -2.0116820 2.9905566  
 O -6.2771881 -0.2208906 0.5717523  
 O -0.5222837 -1.8773522 -1.0882799

**3de\_ts** : 1,2-W-shift of [W(CO)<sub>5</sub>]PPh<sub>2</sub>PMe\*

39  
 Energy = -1820.593059405  
 P -1.3574398 0.0653952 0.0358255  
 C -2.9028897 -0.8599032 -0.2501736  
 C -1.8292585 1.8105419 0.2007264  
 P -0.4033608 -0.5437264 1.8759000  
 C -4.1074489 -0.4393421 0.3345133  
 C -2.8762164 -2.0180675 -1.0390374  
 C -1.5481710 2.5629039 1.3488727  
 C -2.4286535 2.4322757 -0.9077168  
 C -0.8759621 -2.3522923 1.8782703  
 C -5.2703561 -1.1795187 0.1315412  
 H -4.1312007 0.4593137 0.9435289  
 C -4.0421642 -2.7597065 -1.2297612  
 H -1.9513175 -2.3303601 -1.5143020  
 C -1.8662821 3.9206388 1.3878049  
 H -1.0926377 2.0841285 2.2110596  
 C -2.7600368 3.7838120 -0.8562316  
 H -2.6388289 1.8559411 -1.8049681  
 H -1.8268668 -2.4678780 2.4073778  
 H -0.9677998 -2.7818679 0.8786309  
 H -0.1014321 -2.8963270 2.4267519  
 C -5.2389226 -2.3408160 -0.6462928  
 H -6.2020226 -0.8514545 0.5836986  
 H -4.0169563 -3.6565584 -1.8416935  
 C -2.4745656 4.5317204 0.2899771  
 H -1.6467408 4.4979518 2.2813133  
 H -3.2322315 4.2557128 -1.7129672  
 H -6.1481910 -2.9142751 -0.8008935  
 H -2.7253776 5.5878771 0.3255144  
 W 1.4497937 -0.3442767 -0.1568301  
 C 3.2782628 -0.3533061 -0.9691425  
 C 0.9190790 0.7958363 -1.8074957  
 C 2.3272903 -1.4845866 1.3331848  
 C 0.9592666 -2.0816747 -1.1493783  
 C 1.8686422 1.4054361 0.8550068  
 O 4.3622348 -0.3747878 -1.3953249  
 O 0.7093710 1.4152990 -2.7587771  
 O 2.8831130 -2.1068356 2.1306252  
 O 0.7062748 -3.0526251 -1.7240870  
 O 2.0951895 2.3854576 1.4198851

**3de\*** : PPh<sub>2</sub>PMe[W(CO)<sub>5</sub>]\* radical complex  
 39

Energy = -1820.609027661  
 P -2.0632805 -0.3715943 -0.9190943  
 C -3.4033890 -1.3232788 -0.1034909  
 C -2.2669397 1.3470219 -0.3296839  
 P -0.2878573 -0.9751770 0.1855433  
 C -4.1055000 -0.8601721 1.0183207  
 C -3.7323229 -2.5726401 -0.6532822

|   |            |            |            |
|---|------------|------------|------------|
| C | -1.8525578 | 1.7934077  | 0.9351883  |
| C | -2.8394370 | 2.2643577  | -1.2240613 |
| C | -0.2883982 | -2.8102131 | 0.0260800  |
| C | -5.1123103 | -1.6402778 | 1.5853586  |
| H | -3.8671086 | 0.1100068  | 1.4433094  |
| C | -4.7301125 | -3.3570093 | -0.0740872 |
| H | -3.2100108 | -2.9270827 | -1.5384528 |
| C | -2.0002011 | 3.1321191  | 1.2936070  |
| H | -1.4115156 | 1.0903626  | 1.6362981  |
| C | -2.9996475 | 3.6002154  | -0.8582160 |
| H | -3.1484138 | 1.9315885  | -2.2115408 |
| H | -1.2421668 | -3.2272724 | 0.3600703  |
| H | -0.1065012 | -3.1095674 | -1.0116222 |
| H | 0.5176832  | -3.2028794 | 0.6516620  |
| C | -5.4222725 | -2.8914577 | 1.0453538  |
| H | -5.6534374 | -1.2724510 | 2.4526853  |
| H | -4.9729281 | -4.3245676 | -0.5039292 |
| C | -2.5742650 | 4.0367983  | 0.3979599  |
| H | -1.6670226 | 3.4676477  | 2.2713863  |
| H | -3.4436316 | 4.3017811  | -1.5584787 |
| H | -6.2059029 | -3.4969699 | 1.4914473  |
| H | -2.6865408 | 5.0804066  | 0.6774900  |
| W | 1.8650672  | 0.2520756  | -0.1786828 |
| C | 3.6574068  | 1.1144539  | -0.5687314 |
| C | 0.9521244  | 1.7063881  | -1.3273688 |
| C | 2.7979110  | -1.1786082 | 0.9710877  |
| C | 2.0724657  | -0.9557464 | -1.8385720 |
| C | 1.5948571  | 1.4537375  | 1.4822482  |
| O | 4.6880880  | 1.5896407  | -0.8100416 |
| O | 0.4919237  | 2.5382115  | -1.9818206 |
| O | 3.3309342  | -1.9794835 | 1.6121547  |
| O | 2.1698872  | -1.6408787 | -2.7629331 |
| O | 1.4533876  | 2.1333954  | 2.4049098  |

**3dT** : [W(CO)<sub>5</sub>]PPh<sub>2</sub>PmeT complex  
67

Energy = -2229.454791265

|   |            |            |            |
|---|------------|------------|------------|
| P | -0.0975664 | 0.8655810  | -0.0124639 |
| C | -0.8289966 | 0.9259789  | -1.6835173 |
| C | 0.3380458  | 2.5815370  | 0.4435483  |
| N | -3.0877540 | -0.2488796 | 1.1815874  |
| C | -1.5853260 | -0.1914831 | -2.0728694 |
| C | -0.5828106 | 1.9414466  | -2.6150346 |
| C | 1.4292935  | 2.8147153  | 1.2918837  |
| C | -0.5007203 | 3.6582244  | 0.1044338  |
| C | -4.4273611 | 0.0814649  | 0.5290767  |
| C | -2.9289454 | -1.6068858 | 1.8277632  |
| C | -2.1009946 | -0.2832127 | -3.3627926 |
| H | -1.7685071 | -0.9883508 | -1.3574330 |
| C | -1.0996880 | 1.8459809  | -3.9079471 |
| H | 0.0247523  | 2.7979183  | -2.3406727 |

|   |            |            |            |
|---|------------|------------|------------|
| C | 1.7021490  | 4.0969096  | 1.7647409  |
| H | 2.0557495  | 1.9826687  | 1.5969711  |
| C | -0.2183864 | 4.9430276  | 0.5663176  |
| H | -1.3739258 | 3.4879129  | -0.5163490 |
| C | -4.8800961 | -1.0952293 | -0.3568699 |
| C | -4.3346129 | 1.3079893  | -0.3989831 |
| C | -5.4904286 | 0.4178861  | 1.5949798  |
| C | -3.4231841 | -2.6968831 | 0.8550962  |
| C | -3.6800032 | -1.7135978 | 3.1726416  |
| C | -1.4496770 | -1.8925513 | 2.1166995  |
| C | -1.8617018 | 0.7388221  | -4.2843635 |
| H | -2.6877459 | -1.1513725 | -3.6497257 |
| H | -0.8994015 | 2.6379672  | -4.6241793 |
| C | 0.8835073  | 5.1661304  | 1.3949762  |
| H | 2.5523848  | 4.2601316  | 2.4206436  |
| H | -0.8657841 | 5.7690521  | 0.2856968  |
| C | -4.8351541 | -2.4485472 | 0.3405538  |
| H | -4.2290974 | -1.1241918 | -1.2401295 |
| H | -5.8931251 | -0.8715733 | -0.7116987 |
| H | -4.2153405 | 2.2422390  | 0.1536023  |
| H | -3.5119725 | 1.2154207  | -1.1125396 |
| H | -5.2748763 | 1.3566663  | -0.9604943 |
| H | -5.0974990 | 1.1717488  | 2.2848934  |
| H | -5.8086496 | -0.4500401 | 2.1732594  |
| H | -6.3760570 | 0.8314477  | 1.0999198  |
| H | -2.7291235 | -2.7415909 | 0.0052817  |
| H | -3.3572375 | -3.6607322 | 1.3737710  |
| H | -4.7615075 | -1.7912648 | 3.0569489  |
| H | -3.3368055 | -2.6154133 | 3.6920657  |
| H | -3.4600042 | -0.8496502 | 3.8057369  |
| H | -1.1296441 | -1.4757353 | 3.0720207  |
| H | -1.3027660 | -2.9755318 | 2.1649980  |
| H | -0.8052814 | -1.4983340 | 1.3281473  |
| H | -2.2600996 | 0.6682863  | -5.2923122 |
| H | 1.0986849  | 6.1675134  | 1.7567650  |
| H | -5.1259524 | -3.2404191 | -0.3591710 |
| H | -5.5562639 | -2.4805389 | 1.1665846  |
| W | 1.8925066  | -0.8131384 | -0.1709823 |
| C | 1.9618548  | -1.0201522 | 1.8767508  |
| C | 3.2988702  | 0.6900652  | -0.1539112 |
| C | 0.6516747  | -2.4336787 | -0.4259216 |
| C | 1.8287242  | -0.5739668 | -2.2170632 |
| C | 3.4327353  | -2.0885043 | -0.3598285 |
| O | 2.0338642  | -1.1514410 | 3.0250526  |
| O | 4.1462213  | 1.4753992  | -0.2179453 |
| O | 0.0283134  | -3.3848554 | -0.6451307 |
| O | 1.8246535  | -0.4542924 | -3.3657096 |
| O | 4.3287168  | -2.8229627 | -0.4652566 |
| P | -2.0240497 | 1.0625274  | 1.2677807  |
| C | -1.1870471 | 1.0711866  | 2.9256417  |
| H | -1.9354855 | 0.8422798  | 3.6896250  |

H -0.3394311 0.3950911 3.0367691  
H -0.8416588 2.0975251 3.0799265

**3d<sup>-</sup>** : [W(CO)<sub>5</sub>]PPh<sub>2</sub>PMe<sup>-</sup> anion complex  
39

Energy = -1820.742062504

P -2.1004779 0.8548574 0.2028678  
C -2.5703514 1.9153948 1.6333140  
C -2.2649061 2.0573866 -1.1921829  
P -0.0957984 0.2179269 0.4749113  
C -2.2547987 3.2833443 1.6663055  
C -3.1345278 1.3341647 2.7783326  
C -1.2849408 2.0948318 -2.1881684  
C -3.4000415 2.8709689 -1.3222709  
C 0.7298643 1.8871133 0.7989495  
C -2.5073336 4.0466978 2.8080023  
H -1.8172909 3.7545621 0.7915239  
C -3.3938318 2.0946392 3.9159853  
H -3.3714912 0.2746675 2.7732662  
C -1.4311284 2.9311541 -3.2967411  
H -0.4145076 1.4492402 -2.0745775  
C -3.5460975 3.7097133 -2.4256037  
H -4.1724443 2.8439802 -0.5574588  
H 0.3272483 2.3827518 1.6907778  
H 1.7970639 1.6970029 0.9663096  
H 0.6370531 2.5773940 -0.0486221  
C -3.0806247 3.4576676 3.9358743  
H -2.2548214 5.1042452 2.8141943  
H -3.8443844 1.6260218 4.7872855  
C -2.5605167 3.7430180 -3.4171367  
H -0.6610133 2.9520927 -4.0641378  
H -4.4307743 4.3351088 -2.5164309  
H -3.2829713 4.0531204 4.8221777  
H -2.6753036 4.3967611 -4.2778840  
W -3.6185177 -1.1815062 -0.2419951  
C -4.7552193 -2.8031935 -0.5768268  
C -4.2691786 -0.3396417 -1.9993108  
C -2.8952916 -2.0087275 1.5020304  
C -5.1782331 -0.2675940 0.7276614  
C -2.0548254 -2.0211150 -1.2970117  
O -5.4210523 -3.7456928 -0.7626999  
O -4.6444448 0.1084632 -2.9999288  
O -2.5050637 -2.5062613 2.4727920  
O -6.0791904 0.2504916 1.2439069  
O -1.2270971 -2.5274515 -1.9280153

**3d<sup>•</sup>** : [W(CO)<sub>5</sub>]PPh<sub>2</sub>PMe<sup>•</sup> radical complex  
39

Energy = -1820.611693603

P -1.0645730 0.0122648 -0.5190752  
C -1.8509242 1.6033117 -0.0883194

C -2.2112815 -1.2370870 0.1631792  
P -1.4472708 -0.1459176 -2.6817268  
C -1.8026220 2.6852529 -0.9762824  
C -2.4023572 1.7797112 1.1886573  
C -3.5925996 -1.0956546 -0.0543680  
C -1.7323424 -2.3641064 0.8387778  
C -0.8222713 -1.8747610 -2.9032129  
C -2.3100809 3.9272831 -0.5951579  
H -1.3653311 2.5623993 -1.9639605  
C -2.9074006 3.0228074 1.5654696  
H -2.4403106 0.9464252 1.8844548  
C -4.4754442 -2.0666472 0.4095068  
H -3.9707171 -0.2228721 -0.5791381  
C -2.6197706 -3.3385560 1.2993525  
H -0.6673581 -2.4759592 1.0115187  
H 0.2642383 -1.9094103 -2.7705253  
H -1.2851612 -2.5666918 -2.1918375  
H -1.0603105 -2.1913555 -3.9221522  
C -2.8632942 4.0981008 0.6748015  
H -2.2722778 4.7596263 -1.2917951  
H -3.3354924 3.1513637 2.5554023  
C -3.9901685 -3.1906495 1.0858527  
H -5.5420657 -1.9493809 0.2417330  
H -2.2392489 -4.2080401 1.8270636  
H -3.2577927 5.0657568 0.9707187  
H -4.6810214 -3.9474205 1.4457223  
W 1.3989146 -0.0500795 0.1533576  
C 3.3212061 -0.0351920 0.7732297  
C 1.2870195 1.9798464 0.5062364  
C 1.5675524 -2.0653521 -0.2235892  
C 2.0037878 0.3496424 -1.7771476  
C 0.7735239 -0.3908772 2.0868675  
O 4.4219029 -0.0296771 1.1422775  
O 1.2509891 3.1155986 0.7081499  
O 1.7068089 -3.1944284 -0.4379146  
O 2.3655009 0.5820248 -2.8502565  
O 0.4253559 -0.5586123 3.1762824

**4ac<sub>ts</sub>** : O-C cyclization of [W(CO)<sub>5</sub>]PPhO<sup>•</sup>  
25

Energy = -1283.310249473

P 0.7492932 1.1114822 -1.0286393  
C 0.2300360 2.7560928 -0.4999170  
H 0.6491796 1.2450252 -2.4313634  
O 2.2733625 0.8576890 -0.6333111  
C 0.7613663 3.3120448 0.6719892  
C -0.7664977 3.4393712 -1.2120246  
C 0.3006854 4.5478801 1.1231334  
H 1.5386672 2.7842678 1.2168189  
C -1.2309292 4.6695149 -0.7490942  
H -1.1736972 3.0165673 -2.1273906

|   |            |            |            |
|---|------------|------------|------------|
| C | -0.6976120 | 5.2239029  | 0.4173068  |
| H | 0.7207718  | 4.9835463  | 2.0247891  |
| H | -2.0007470 | 5.1989951  | -1.3024877 |
| H | -1.0567090 | 6.1850568  | 0.7731933  |
| W | -0.1158440 | -0.9707362 | 0.0991507  |
| C | -0.2982326 | -2.7565042 | 1.1508220  |
| C | 0.1882656  | -1.9738576 | -1.6695701 |
| C | -0.3244765 | 0.1029661  | 1.8389170  |
| C | -2.0035519 | -0.3843861 | -0.4947598 |
| C | 2.0497659  | -0.6507584 | 0.2315842  |
| O | -0.4029073 | -3.7464945 | 1.7292173  |
| O | 0.3736746  | -2.5122786 | -2.6730589 |
| O | -0.4337438 | 0.7193519  | 2.8080364  |
| O | -3.0049102 | 0.0476355  | -0.8662143 |
| O | 3.0728547  | -1.0655419 | 0.6302394  |

**4ac\*** : [W(CO)<sub>5</sub>]PPhO\* with a CO in ring  
25

Energy = -1283.315553675

|   |            |            |            |
|---|------------|------------|------------|
| P | -2.4416244 | 0.9545548  | 0.2465369  |
| C | -2.6454772 | 1.9994504  | 1.6909500  |
| H | -2.2874163 | 1.9262695  | -0.7593864 |
| O | -0.9010061 | 0.2890035  | 0.2988067  |
| C | -2.0853876 | 3.2885466  | 1.7112739  |
| C | -3.3660533 | 1.5313376  | 2.8000658  |
| C | -2.2307388 | 4.0880825  | 2.8419072  |
| H | -1.5392839 | 3.6596676  | 0.8485113  |
| C | -3.5113790 | 2.3375388  | 3.9264597  |
| H | -3.8174381 | 0.5445040  | 2.7746580  |
| C | -2.9410114 | 3.6123614  | 3.9477177  |
| H | -1.7954065 | 5.0824604  | 2.8596201  |
| H | -4.0717471 | 1.9758521  | 4.7829127  |
| H | -3.0567613 | 4.2409357  | 4.8256573  |
| W | -3.4284072 | -1.3141766 | -0.1955065 |
| C | -3.9651163 | -3.2548282 | -0.6332302 |
| C | -3.3909639 | -0.8257222 | -2.1955846 |
| C | -3.3197043 | -1.8736212 | 1.7749620  |
| C | -5.2564817 | -0.4806013 | 0.1263938  |
| C | -1.2248535 | -1.0628436 | -0.0381504 |
| O | -4.2879465 | -4.3350264 | -0.8821828 |
| O | -3.3575608 | -0.5491401 | -3.3161543 |
| O | -3.2416072 | -2.2165814 | 2.8762110  |
| O | -6.2511659 | 0.0635865  | 0.3536392  |
| O | -0.3209980 | -1.8491018 | -0.1801868 |

**4ae\_ts** : 1,2-W-shift of [W(CO)<sub>5</sub>]PPhO\*  
25

Energy = -1283.332139260

|   |           |            |            |
|---|-----------|------------|------------|
| P | 1.3351787 | -0.9771443 | -0.7695579 |
| O | 0.6743063 | -1.8451900 | 0.3427708  |
| H | 1.4975431 | -1.6882062 | -1.9839168 |

|   |            |            |            |
|---|------------|------------|------------|
| C | -1.5307751 | -1.0042792 | 1.9513707  |
| W | -0.9267900 | -0.1087982 | 0.1534751  |
| O | -1.9947007 | -1.3963018 | 2.9300707  |
| C | -2.5258154 | 1.0579430  | 0.4591010  |
| C | -0.7956914 | 1.0354883  | -1.5625787 |
| C | 0.2228803  | 1.2288068  | 1.2215162  |
| C | -2.0500926 | -1.4804876 | -0.9147202 |
| O | -3.4542670 | 1.7354115  | 0.6410913  |
| O | -0.8017533 | 1.7134646  | -2.4947683 |
| O | 0.8413788  | 1.9999311  | 1.8156851  |
| O | -2.6959104 | -2.2263217 | -1.5089324 |
| C | 3.0054631  | -0.4514189 | -0.3810250 |
| C | 3.8699271  | -0.0480318 | -1.4121550 |
| C | 3.4139523  | -0.3639821 | 0.9587424  |
| C | 5.1410612  | 0.4273881  | -1.0996788 |
| H | 3.5561819  | -0.1170003 | -2.4509332 |
| C | 4.6908585  | 0.1041477  | 1.2603059  |
| H | 2.7396647  | -0.6787651 | 1.7498670  |
| C | 5.5520593  | 0.5033528  | 0.2346197  |
| H | 5.8136062  | 0.7319858  | -1.8959484 |
| H | 5.0149210  | 0.1574014  | 2.2953659  |
| H | 6.5451401  | 0.8716529  | 0.4742640  |

**4ac\*** : PPhO[W(CO)<sub>5</sub>]\* radical complex  
25

Energy = -1283.333655113

|   |            |            |            |
|---|------------|------------|------------|
| P | 2.2875885  | -1.2807730 | -1.8706729 |
| O | 0.8142611  | -1.8707117 | -1.8265274 |
| H | 2.9651255  | -2.1331577 | -0.9601760 |
| C | -1.6593994 | -2.7428561 | -0.5511997 |
| W | -1.1805988 | -1.2469831 | -1.9105466 |
| O | -1.9954107 | -3.5555716 | 0.1927658  |
| C | -3.1356715 | -0.7557557 | -1.9414693 |
| C | -0.8468243 | 0.2844847  | -3.2572690 |
| C | -0.9885820 | 0.1772564  | -0.4130059 |
| C | -1.5827221 | -2.6124461 | -3.4171764 |
| O | -4.2609210 | -0.4631317 | -1.9598855 |
| O | -0.7328674 | 1.1622442  | -3.9979001 |
| O | -1.0137434 | 0.9934964  | 0.4005288  |
| O | -1.8859980 | -3.3517185 | -4.2479347 |
| C | 2.2915778  | 0.2678169  | -0.9199390 |
| C | 2.0339314  | 1.4799893  | -1.5801294 |
| C | 2.4998065  | 0.2638454  | 0.4690740  |
| C | 1.9555426  | 2.6683495  | -0.8567170 |
| H | 1.8990778  | 1.4909750  | -2.6582225 |
| C | 2.4307678  | 1.4566573  | 1.1869074  |
| H | 2.7032551  | -0.6702442 | 0.9856312  |
| C | 2.1524784  | 2.6557539  | 0.5259118  |
| H | 1.7480718  | 3.6027451  | -1.3696248 |
| H | 2.5859733  | 1.4497871  | 2.2618312  |
| H | 2.0940809  | 3.5824236  | 1.0893419  |

**4ap<sub>ts</sub>** : P-to-O 1,2-H-shift of [W(CO)<sub>5</sub>]PPhO\*  
25

Energy = -1283.283254378

|   |            |            |            |
|---|------------|------------|------------|
| P | 1.1329821  | -1.1595857 | -0.2204905 |
| O | 1.3598754  | -2.7000953 | 0.2456824  |
| H | 1.2580087  | -2.4143624 | -1.1042612 |
| C | -1.2472580 | -1.1504271 | 1.8251519  |
| W | -0.9769465 | 0.0450110  | 0.1600462  |
| O | -1.3949976 | -1.8251624 | 2.7473867  |
| C | -2.7205873 | 1.0242115  | 0.5769057  |
| C | -0.7000256 | 1.2051191  | -1.5252314 |
| C | 0.0415688  | 1.4314562  | 1.2996101  |
| C | -1.9793045 | -1.3733589 | -0.9627389 |
| O | -3.7017516 | 1.5814237  | 0.8265213  |
| O | -0.5474614 | 1.8529275  | -2.4680535 |
| O | 0.6061119  | 2.2040967  | 1.9437415  |
| O | -2.5362466 | -2.1697966 | -1.5827713 |
| C | 2.7381746  | -0.3530896 | -0.2222509 |
| C | 2.8322671  | 1.0127151  | -0.5435083 |
| C | 3.9015389  | -1.0802082 | 0.0880689  |
| C | 4.0736142  | 1.6411337  | -0.5581377 |
| H | 1.9362448  | 1.5788844  | -0.7798178 |
| C | 5.1375823  | -0.4404870 | 0.0855427  |
| H | 3.8232872  | -2.1346998 | 0.3332217  |
| C | 5.2260260  | 0.9166090  | -0.2404034 |
| H | 4.1433689  | 2.6946014  | -0.8106496 |
| H | 6.0345024  | -0.9994310 | 0.3353665  |
| H | 6.1933477  | 1.4101499  | -0.2455081 |

**4ap\*** : [W(CO)<sub>5</sub>]PPhOH\* radical complex  
25

Energy = -1283.349385262

|   |            |            |            |
|---|------------|------------|------------|
| P | 0.2145937  | -0.6867840 | -0.8774933 |
| O | 0.3557164  | -2.3120597 | -1.0557009 |
| H | 1.2611182  | -2.6025333 | -1.2718717 |
| C | -2.5323971 | -1.7253323 | 0.2363448  |
| W | -2.0931379 | 0.1413349  | -0.5337589 |
| O | -2.7731924 | -2.7679144 | 0.6658979  |
| C | -3.9924958 | 0.7428788  | -0.1313413 |
| C | -1.6414507 | 1.9975447  | -1.3157558 |
| C | -1.4932401 | 0.7935723  | 1.3283446  |
| C | -2.6435954 | -0.5307139 | -2.4087650 |
| O | -5.0748540 | 1.0686116  | 0.1227772  |
| O | -1.3968604 | 3.0401052  | -1.7488082 |
| O | -1.1479779 | 1.1533305  | 2.3690117  |
| O | -2.9563010 | -0.9038885 | -3.4552440 |
| C | 1.6052852  | -0.1667643 | 0.1224779  |
| C | 1.7806114  | 1.2177756  | 0.3287821  |
| C | 2.5333661  | -1.0665364 | 0.6810111  |
| C | 2.8513816  | 1.6859681  | 1.0803418  |

|   |           |            |            |
|---|-----------|------------|------------|
| H | 1.0728827 | 1.9215125  | -0.1020280 |
| C | 3.6032268 | -0.5880259 | 1.4335746  |
| H | 2.4064077 | -2.1378313 | 0.5545833  |
| C | 3.7674554 | 0.7850580  | 1.6347314  |
| H | 2.9747454 | 2.7536645  | 1.2351273  |
| H | 4.3067824 | -1.2902990 | 1.8712092  |
| H | 4.6029815 | 1.1523585  | 2.2229139  |

**4aT** : [W(CO)<sub>5</sub>]PPhOT complex  
53

Energy = -1692.147389106

|   |            |            |            |
|---|------------|------------|------------|
| P | 0.2023796  | 0.7691239  | -0.0825104 |
| O | -1.3650519 | 1.2909807  | -0.1348410 |
| C | 0.9845499  | 2.0749664  | -1.0660387 |
| H | 0.5934623  | 1.2444132  | 1.1911335  |
| N | -2.4083286 | 0.2429111  | -0.0278396 |
| C | 1.4631156  | 3.2328848  | -0.4355798 |
| C | 1.1229171  | 1.9390609  | -2.4552782 |
| C | -3.2737556 | 0.4187000  | -1.2386209 |
| C | -3.0227953 | 0.3828783  | 1.3318841  |
| C | 2.0729741  | 4.2391017  | -1.1847424 |
| H | 1.3623058  | 3.3433461  | 0.6407705  |
| C | 1.7235311  | 2.9486822  | -3.2027503 |
| H | 0.7665644  | 1.0420682  | -2.9508025 |
| C | -4.4234071 | -0.5995269 | -1.0943551 |
| C | -2.4264113 | 0.0227984  | -2.4538620 |
| C | -3.8124773 | 1.8449465  | -1.4648376 |
| C | -4.1795317 | -0.6368051 | 1.3827867  |
| C | -3.5064332 | 1.7987953  | 1.7003347  |
| C | -1.9583374 | -0.0453211 | 2.3517834  |
| C | 2.2013304  | 4.0983855  | -2.5675770 |
| H | 2.4470217  | 5.1302637  | -0.6893063 |
| H | 1.8270556  | 2.8370783  | -4.2779509 |
| C | -5.1690101 | -0.4704319 | 0.2317992  |
| H | -4.0025936 | -1.6091228 | -1.1726127 |
| H | -5.0983085 | -0.4584022 | -1.9464278 |
| H | -1.6251530 | 0.7456908  | -2.6297796 |
| H | -1.9868750 | -0.9656321 | -2.3034359 |
| H | -3.0593967 | -0.0057283 | -3.3465193 |
| H | -3.0093057 | 2.5778117  | -1.3554584 |
| H | -4.6220734 | 2.1050898  | -0.7814837 |
| H | -4.2021875 | 1.9131586  | -2.4860350 |
| H | -3.7524435 | -1.6461723 | 1.3466802  |
| H | -4.6752666 | -0.5244996 | 2.3538442  |
| H | -2.7453086 | 2.5400953  | 1.4440830  |
| H | -4.4405580 | 2.0692349  | 1.2057348  |
| H | -3.6767515 | 1.8408912  | 2.7813877  |
| H | -1.5188242 | -1.0046965 | 2.0664563  |
| H | -1.1628148 | 0.7009457  | 2.4407378  |
| H | -2.4217056 | -0.1525955 | 3.3377407  |
| H | 2.6771802  | 4.8814045  | -3.1508318 |

|   |            |            |            |
|---|------------|------------|------------|
| H | -5.9501174 | -1.2361656 | 0.2973841  |
| H | -5.6754109 | 0.5001984  | 0.2964485  |
| W | 0.9699588  | -1.6006578 | -0.4539750 |
| C | 1.2524308  | -1.6793990 | 1.5841067  |
| C | 2.8331392  | -0.7644689 | -0.6997923 |
| C | -0.8875571 | -2.4893020 | -0.2385798 |
| C | 0.7012434  | -1.5548645 | -2.4940839 |
| C | 1.7909496  | -3.4441114 | -0.6228058 |
| O | 1.4187856  | -1.7231178 | 2.7270165  |
| O | 3.8852640  | -0.3079122 | -0.8469571 |
| O | -1.8736026 | -3.0799249 | -0.1281656 |
| O | 0.5749386  | -1.5743350 | -3.6443698 |
| O | 2.2771294  | -4.4940667 | -0.7089205 |

**4a<sup>-</sup>** : [W(CO)<sub>5</sub>]PPhO<sup>-</sup> anion complex  
25

Energy = -1283.512227813

|   |            |            |            |
|---|------------|------------|------------|
| P | 0.2794791  | -0.8463467 | -1.1473908 |
| O | 0.4298480  | -2.3495484 | -1.3702293 |
| H | 0.7121645  | -0.1312772 | -2.3112489 |
| C | -2.2248959 | -1.7225318 | 0.5674343  |
| W | -2.0200321 | 0.0683412  | -0.4255378 |
| O | -2.3027331 | -2.7349435 | 1.1250060  |
| C | -3.8641317 | 0.7173205  | 0.0751245  |
| C | -1.5518795 | 1.7761869  | -1.4545287 |
| C | -1.2088175 | 0.8748906  | 1.2808437  |
| C | -2.7101426 | -0.7990811 | -2.1562649 |
| O | -4.9337337 | 1.0943923  | 0.3549359  |
| O | -1.2356022 | 2.7256869  | -2.0448523 |
| O | -0.7482622 | 1.3237749  | 2.2455491  |
| O | -3.0858320 | -1.2938034 | -3.1358584 |
| C | 1.6029974  | -0.2463106 | -0.0216978 |
| C | 1.9587586  | 1.1083203  | 0.0338120  |
| C | 2.2285891  | -1.1519651 | 0.8419866  |
| C | 2.9260515  | 1.5494839  | 0.9348338  |
| H | 1.4755003  | 1.8220624  | -0.6309704 |
| C | 3.1940766  | -0.7106392 | 1.7507390  |
| H | 1.9547353  | -2.2025997 | 0.7863985  |
| C | 3.5447140  | 0.6397757  | 1.7990852  |
| H | 3.1996252  | 2.6011843  | 0.9655916  |
| H | 3.6738522  | -1.4213125 | 2.4193738  |
| H | 4.2967215  | 0.9839714  | 2.5042278  |

**4a<sup>•</sup>** : [W(CO)<sub>5</sub>]PPhO<sup>•</sup> radical complex  
25

Energy = -1283.337727908

|   |            |            |            |
|---|------------|------------|------------|
| P | 0.4177320  | -0.2242866 | -1.2732163 |
| O | 0.2893244  | -1.6598476 | -1.8050107 |
| H | 0.8273782  | 0.7004493  | -2.2650341 |
| C | -1.8978015 | -1.8310176 | 0.6019292  |
| W | -2.0114433 | -0.1103621 | -0.5525002 |

|   |            |            |            |
|---|------------|------------|------------|
| O | -1.8240887 | -2.7823906 | 1.2461061  |
| C | -3.8258338 | 0.4609967  | 0.1505953  |
| C | -2.0298859 | 1.5539052  | -1.7669858 |
| C | -1.2203291 | 0.9059110  | 1.0624079  |
| C | -2.8107157 | -1.1833272 | -2.1501035 |
| O | -4.8372442 | 0.8424553  | 0.5623092  |
| O | -2.0186858 | 2.4763958  | -2.4584460 |
| O | -0.7809353 | 1.4588148  | 1.9718307  |
| O | -3.2703069 | -1.7694651 | -3.0257966 |
| C | 1.6941589  | 0.0076408  | -0.0219679 |
| C | 2.4076676  | 1.2126870  | 0.0247377  |
| C | 1.9122126  | -0.9803570 | 0.9488446  |
| C | 3.3401454  | 1.4261918  | 1.0396942  |
| H | 2.2416121  | 1.9774855  | -0.7301781 |
| C | 2.8518170  | -0.7644597 | 1.9537578  |
| H | 1.3571612  | -1.9134134 | 0.9063151  |
| C | 3.5617413  | 0.4392186  | 2.0021353  |
| H | 3.8964799  | 2.3580893  | 1.0742488  |
| H | 3.0307156  | -1.5323014 | 2.7004974  |
| H | 4.2901754  | 0.6060187  | 2.7901914  |

**4bc<sup>•</sup>** : [W(CO)<sub>5</sub>]PPhS<sup>•</sup> with a CO in ring  
25

Energy = -1606.282126807

|   |            |            |            |
|---|------------|------------|------------|
| P | -2.2743356 | 0.9470005  | 0.3031971  |
| C | -2.5931395 | 2.0133640  | 1.7237780  |
| H | -2.1538159 | 1.9202614  | -0.7067023 |
| S | -0.3136507 | 0.1469111  | 0.4191272  |
| C | -2.3024241 | 3.3848600  | 1.6528422  |
| C | -3.1401634 | 1.4733636  | 2.8965201  |
| C | -2.5506202 | 4.2035959  | 2.7528755  |
| H | -1.8865603 | 3.8077182  | 0.7425763  |
| C | -3.3826473 | 2.2961724  | 3.9935862  |
| H | -3.3807209 | 0.4165219  | 2.9470715  |
| C | -3.0872922 | 3.6598856  | 3.9223072  |
| H | -2.3273841 | 5.2646611  | 2.6961959  |
| H | -3.8082707 | 1.8763693  | 4.8998400  |
| H | -3.2813737 | 4.3006367  | 4.7773143  |
| W | -3.3771537 | -1.2946506 | -0.1957358 |
| C | -4.1709256 | -3.1171282 | -0.6781792 |
| C | -3.3295944 | -0.7424297 | -2.1801790 |
| C | -3.2970946 | -1.9407240 | 1.7495868  |
| C | -5.1158154 | -0.3223821 | 0.1906988  |
| C | -1.1626055 | -1.4203355 | -0.1008773 |
| O | -4.6556880 | -4.1306055 | -0.9534022 |
| O | -3.2900891 | -0.4327639 | -3.2921034 |
| O | -3.2408144 | -2.3383642 | 2.8341408  |
| O | -6.0623355 | 0.2883402  | 0.4583634  |
| O | -0.5510218 | -2.4277696 | -0.3669408 |

**4be\_ts** : 1,2-W-shift of [W(CO)<sub>5</sub>]PPhS<sup>•</sup>

25  
 Energy = -1606.310513681  
 P 1.3842647 0.1146578 -1.1572313  
 S 0.4578879 -1.5349232 -1.8521440  
 H 1.7870477 0.9633666 -2.2081328  
 C 0.0543248 0.3237019 1.6777396  
 W -0.9549222 0.3734388 -0.1211579  
 O 0.5799931 0.3206106 2.7042050  
 C -2.5575654 1.0762294 0.8680875  
 C -2.0118043 0.4176202 -1.9078292  
 C -0.5428724 2.3821613 -0.4130347  
 C -1.6987880 -1.5182354 0.3479487  
 O -3.4462540 1.5419235 1.4549284  
 O -2.6236684 0.4476704 -2.8820722  
 O -0.3895849 3.5188417 -0.5223872  
 O -2.1985338 -2.5117056 0.6434298  
 C 2.9427075 -0.1863912 -0.3059596  
 C 4.0865905 0.5290687 -0.6883786  
 C 3.0060546 -1.1056422 0.7513800  
 C 5.2889896 0.3223092 -0.0120719  
 H 4.0408234 1.2348106 -1.5135168  
 C 4.2105836 -1.3093150 1.4177470  
 H 2.1220735 -1.6703033 1.0335530  
 C 5.3509378 -0.5929195 1.0401245  
 H 6.1761760 0.8718457 -0.3121457  
 H 4.2617828 -2.0256677 2.2320964  
 H 6.2886082 -0.7532161 1.5639467

**4be<sup>\*</sup>** : PPhS[W(CO)<sub>5</sub>]<sup>\*</sup> radical complex

25  
 Energy = -1606.314058655  
 P 1.3873382 -0.5029271 -2.0888194  
 S -0.3488249 -1.6243220 -1.6869937  
 H 2.2402889 -1.6095605 -2.3179245  
 C -2.7036573 -2.1249900 0.3523917  
 W -2.0120966 -0.3266157 -0.4023256  
 O -3.1137473 -3.1142502 0.7774319  
 C -3.5090630 0.6515381 0.5581387  
 C -1.3440849 1.4770030 -1.1569229  
 C -0.8408231 -0.0053398 1.2865013  
 C -3.3124807 -0.5887857 -1.9949479  
 O -4.3645672 1.2139359 1.1006799  
 O -1.0048953 2.4991878 -1.5689543  
 O -0.2878529 0.2041465 2.2734099  
 O -4.0648166 -0.7236602 -2.8559106  
 C 2.0339367 0.0342672 -0.4673157  
 C 2.0516764 1.4052622 -0.1732721  
 C 2.5315807 -0.8835886 0.4722700  
 C 2.5524106 1.8538089 1.0495851  
 H 1.6837050 2.1196975 -0.9036377  
 C 3.0369887 -0.4300695 1.6880165

H 2.5173615 -1.9470437 0.2516686  
 C 3.0453400 0.9375690 1.9786891  
 H 2.5611770 2.9166790 1.2722899  
 H 3.4196844 -1.1432629 2.4123618  
 H 3.4364723 1.2863524 2.9299515

4bH : aa

26  
 Energy = -1606.942944541  
 P -0.1282335 0.6470301 -0.4513145  
 S -2.1311313 0.7059948 -1.1750682  
 C 0.7500673 1.9843789 -1.3084287  
 H -0.3645474 1.2935370 0.7774094  
 C 0.9833913 3.2063724 -0.6638644  
 C 1.2307185 1.7792421 -2.6097036  
 C 1.6975378 4.2122794 -1.3161707  
 H 0.6115717 3.3708822 0.3438939  
 C 1.9329288 2.7894424 -3.2605248  
 H 1.0543086 0.8323600 -3.1125817  
 C 2.1698208 4.0056791 -2.6129884  
 H 1.8815857 5.1559647 -0.8112773  
 H 2.3009616 2.6280780 -4.2693013  
 H 2.7237151 4.7901753 -3.1201022  
 W 0.9838297 -1.6093922 -0.3625781  
 C 1.3663185 -1.2669539 1.6348288  
 C 2.7764080 -0.7152516 -0.8539358  
 C -0.8116445 -2.4854962 0.1494873  
 C 0.5780556 -1.9078894 -2.3586211  
 C 1.9156514 -3.4067717 -0.2574645  
 O 1.5729391 -1.0638517 2.7525043  
 O 3.7848998 -0.2218654 -1.1221377  
 O -1.8123996 -2.9840094 0.4385256  
 O 0.3497715 -2.0767227 -3.4798434  
 O 2.4507428 -4.4328142 -0.1954521  
 H -2.0451503 -0.4699837 -1.8226929

**4bp\_ts** : 1,2-H-shift of [W(CO)<sub>5</sub>]PPhS<sup>\*</sup>  
 25

Energy = -1606.274033852  
 P 1.1871068 -0.9438109 -0.2007593  
 S 1.5166048 -2.9832428 0.1169917  
 H 1.3950250 -2.0993407 -1.2645944  
 C -1.3120376 -1.1281310 1.6929296  
 W -1.0267595 0.1296536 0.0766640  
 O -1.4588415 -1.8419820 2.5852234  
 C -2.8508827 0.9718905 0.3935893  
 C -0.7304704 1.3528272 -1.5603505  
 C -0.1799695 1.5516203 1.3085918  
 C -1.8545150 -1.3201181 -1.1439370  
 O -3.8857558 1.4526209 0.5848522  
 O -0.5758350 2.0371416 -2.4767019

|   |            |            |            |
|---|------------|------------|------------|
| O | 0.2863940  | 2.3459633  | 2.0032219  |
| O | -2.3127960 | -2.1333569 | -1.8201028 |
| C | 2.7675407  | -0.0798244 | -0.1288276 |
| C | 2.7659547  | 1.3026025  | -0.3928428 |
| C | 3.9751116  | -0.7284114 | 0.1767369  |
| C | 3.9564626  | 2.0218412  | -0.3533072 |
| H | 1.8349942  | 1.8094312  | -0.6285800 |
| C | 5.1609503  | -0.0003816 | 0.2185459  |
| H | 3.9725944  | -1.7943464 | 0.3824777  |
| C | 5.1553270  | 1.3723899  | -0.0463783 |
| H | 3.9491436  | 3.0875268  | -0.5601649 |
| H | 6.0918388  | -0.5039972 | 0.4617549  |
| H | 6.0831263  | 1.9355890  | -0.0116064 |

**4bp<sup>•</sup>** : [W(CO)<sub>5</sub>]PPhSH<sup>•</sup> radical complex  
25

Energy = -1606.314019229

|   |            |            |            |
|---|------------|------------|------------|
| P | 0.1996712  | -0.6423856 | -0.8787636 |
| S | 0.3742555  | -2.6797957 | -1.3271305 |
| H | 1.6651926  | -2.6668482 | -1.7244243 |
| C | -2.5560438 | -1.6422511 | 0.3560750  |
| W | -2.1118606 | 0.1859111  | -0.5001044 |
| O | -2.8036818 | -2.6606179 | 0.8369377  |
| C | -4.0129855 | 0.7931492  | -0.1227709 |
| C | -1.6840328 | 2.0234711  | -1.3472680 |
| C | -1.5090262 | 0.9044680  | 1.3363908  |
| C | -2.6619038 | -0.5652665 | -2.3442068 |
| O | -5.0980022 | 1.1267913  | 0.1079474  |
| O | -1.4597546 | 3.0550459  | -1.8131719 |
| O | -1.1698833 | 1.2988129  | 2.3662912  |
| O | -2.9700462 | -0.9874263 | -3.3727550 |
| C | 1.6036148  | -0.1698819 | 0.1394152  |
| C | 1.7431353  | 1.2077117  | 0.4112726  |
| C | 2.5594716  | -1.0697248 | 0.6440866  |
| C | 2.8081034  | 1.6677989  | 1.1769091  |
| H | 1.0137222  | 1.9115461  | 0.0187133  |
| C | 3.6217747  | -0.5996186 | 1.4120838  |
| H | 2.4541784  | -2.1342040 | 0.4603946  |
| C | 3.7515666  | 0.7658828  | 1.6796570  |
| H | 2.9043568  | 2.7297840  | 1.3821336  |
| H | 4.3471770  | -1.3035439 | 1.8094639  |
| H | 4.5820522  | 1.1262236  | 2.2791856  |

**4bT** : [W(CO)<sub>5</sub>]PPhST complex  
53

Energy = -2015.152378248

|   |            |            |            |
|---|------------|------------|------------|
| P | 0.0077678  | -0.1584723 | 0.3580733  |
| S | -1.5397662 | 0.3996719  | -0.9883076 |
| C | 0.0932970  | 1.0974505  | 1.6534884  |
| H | -0.5820023 | -1.2043427 | 1.0954233  |
| N | -2.8952086 | 0.8577732  | -0.0483062 |

|   |            |            |            |
|---|------------|------------|------------|
| C | 0.9481885  | 2.1999794  | 1.5187634  |
| C | -0.7607140 | 1.0106486  | 2.7632435  |
| C | -3.9668818 | -0.2079990 | 0.0298942  |
| C | -3.2792440 | 2.3124577  | -0.2338174 |
| C | 0.9469795  | 3.2060361  | 2.4808360  |
| H | 1.6072588  | 2.2717761  | 0.6588930  |
| C | -0.7565658 | 2.0189184  | 3.7266020  |
| H | -1.4267990 | 0.1602225  | 2.8690672  |
| C | -5.0638985 | 0.2714996  | 0.9982386  |
| C | -3.3476217 | -1.4767667 | 0.6301976  |
| C | -4.5657771 | -0.5686221 | -1.3431690 |
| C | -4.4186119 | 2.6433750  | 0.7479954  |
| C | -3.6892023 | 2.6403762  | -1.6828649 |
| C | -2.0845011 | 3.1966128  | 0.1415809  |
| C | 0.0932828  | 3.1175004  | 3.5842322  |
| H | 1.6101301  | 4.0587189  | 2.3716983  |
| H | -1.4187295 | 1.9485797  | 4.5845426  |
| C | -5.5858283 | 1.6664165  | 0.6758864  |
| H | -4.6476696 | 0.2758619  | 2.0144652  |
| H | -5.8694329 | -0.4716641 | 0.9783192  |
| H | -2.6015613 | -1.9158348 | -0.0386765 |
| H | -2.8822147 | -1.2581727 | 1.5957661  |
| H | -4.1383338 | -2.2174206 | 0.7879395  |
| H | -5.1646070 | 0.2413719  | -1.7635771 |
| H | -5.2113716 | -1.4474393 | -1.2400935 |
| H | -3.7663288 | -0.8145434 | -2.0503253 |
| H | -4.0064917 | 2.6292956  | 1.7656521  |
| H | -4.7438820 | 3.6694589  | 0.5408625  |
| H | -2.9020915 | 2.3287230  | -2.3782512 |
| H | -4.6216414 | 2.1542331  | -1.9758282 |
| H | -3.8239208 | 3.7222881  | -1.7877511 |
| H | -1.7676004 | 3.0000171  | 1.1677287  |
| H | -1.2358814 | 3.0350898  | -0.5279346 |
| H | -2.3885562 | 4.2456490  | 0.0618438  |
| H | 0.0933549  | 3.9036261  | 4.3335812  |
| H | -6.3618508 | 1.9529696  | 1.3946770  |
| H | -6.0517659 | 1.6882633  | -0.3168248 |
| W | 1.9946504  | -0.7375211 | -1.0735053 |
| C | 2.0156776  | -2.5852973 | -0.1656727 |
| C | 3.2748281  | -0.0308239 | 0.3773877  |
| C | 0.7484699  | -1.4989149 | -2.5342381 |
| C | 1.8779055  | 1.1308660  | -1.9361098 |
| C | 3.5906848  | -1.2215894 | -2.2233480 |
| O | 2.0083038  | -3.6182743 | 0.3526623  |
| O | 4.0079052  | 0.3497134  | 1.1857408  |
| O | 0.0935666  | -1.9543218 | -3.3700426 |
| O | 1.8092848  | 2.1796909  | -2.4179266 |
| O | 4.5064511  | -1.5013067 | -2.8782186 |

**4b<sup>-</sup>** : [W(CO)<sub>5</sub>]PPhS<sup>-</sup> anion complex  
25



Energy = -1606.480855353  
P 0.3157467 -0.8124151 -1.1845658  
S 0.5469577 -2.7695193 -1.5878820  
H 0.7444862 -0.0689094 -2.3158583  
C -2.2571034 -1.7770032 0.4867422  
W -1.9995210 0.0462501 -0.4420184  
O -2.3901514 -2.7970333 1.0155501  
C -3.8381867 0.6799527 0.0792555  
C -1.5662813 1.8128078 -1.3845462  
C -1.2003050 0.7825835 1.3020466  
C -2.6915340 -0.7444252 -2.2119611  
O -4.9043072 1.0546785 0.3738772  
O -1.2878167 2.8050595 -1.9195617  
O -0.7499245 1.1953970 2.2865956  
O -3.0740151 -1.1915717 -3.2097363  
C 1.6259489 -0.2361605 -0.0291864  
C 1.9695264 1.1223790 0.0113288  
C 2.2332209 -1.1237738 0.8628544  
C 2.9110912 1.5841459 0.9295426  
H 1.4984999 1.8213695 -0.6769244  
C 3.1686084 -0.6595028 1.7907349  
H 1.9717466 -2.1781148 0.8095006  
C 3.5103728 0.6935800 1.8257395  
H 3.1778533 2.6377243 0.9475952  
H 3.6343672 -1.3564399 2.4830278  
H 4.2417710 1.0539724 2.5442112

**4b<sup>•</sup>** : [W(CO)<sub>5</sub>]PPhS<sup>•</sup> radical complex  
25

Energy = -1606.315867167  
P 1.3280507 0.0710887 -1.3347383  
S 0.5317109 -1.5155165 -2.2781537  
H 1.7940343 1.0403301 -2.2473748  
C 0.3711362 0.8102483 1.5261975  
W -0.8521111 0.5227182 -0.1141547  
O 1.0381375 0.9684043 2.4517428  
C -2.3852054 1.1879437 1.0331031  
C -2.1465105 0.2410938 -1.7182414  
C -0.5785933 2.4541355 -0.7847554  
C -1.1317027 -1.4246466 0.5521216  
O -3.2231723 1.6144355 1.7087760  
O -2.8978278 0.1119765 -2.5802813  
O -0.4252740 3.5318524 -1.1645912  
O -1.3004784 -2.4913810 0.9510387  
C 2.8271075 -0.2792187 -0.3878258  
C 3.8818805 0.6423477 -0.4033728  
C 2.8980184 -1.4203296 0.4223122  
C 5.0069031 0.4187406 0.3913812  
H 3.8289413 1.5258377 -1.0344954  
C 4.0254895 -1.6391273 1.2090496  
H 2.0785227 -2.1341867 0.4235430

C 5.0786462 -0.7191114 1.1964314  
H 5.8266533 1.1307569 0.3762833  
H 4.0845730 -2.5262683 1.8324208  
H 5.9559226 -0.8921864 1.8127083

4c0 : aa

25

Energy = -1262.865173586  
P 0.0888160 -1.1088819 -0.3231346  
C -2.9601340 -1.6384697 0.3071758  
W -2.0721406 0.0565927 -0.4729786  
O -3.4510689 -2.5905075 0.7333036  
C -3.8965177 0.9675458 -0.6091058  
C -1.1754238 1.7311714 -1.2821521  
C -1.8418237 0.8123234 1.4346758  
C -2.3026410 -0.7363404 -2.3670530  
O -4.9274374 1.4835407 -0.6836809  
O -0.6819524 2.6668492 -1.7428802  
O -1.7231143 1.2295671 2.5036363  
O -2.4311435 -1.1904604 -3.4189846  
C 1.5842527 -0.3650876 0.3373065  
C 1.5584827 0.9722880 0.7640618  
C 2.7771460 -1.1053909 0.4336823  
C 2.7079420 1.5660446 1.2802833  
H 0.6403632 1.5467699 0.6911596  
C 3.9206550 -0.5076146 0.9512357  
H 2.7875193 -2.1382196 0.1017628  
C 3.8882165 0.8263910 1.3743201  
H 2.6829570 2.6005703 1.6077168  
H 4.8409996 -1.0789691 1.0270661  
H 4.7849070 1.2877027 1.7776482  
N 0.4793430 -2.5811492 -0.7329880  
H -0.3187197 -3.0915767 -1.1212219

**4ce\_ts** : 1,2-W-shift of [W(CO)<sub>5</sub>]PPhNMe<sup>•</sup>  
29

Energy = -1302.754695877  
P 1.3649120 -0.6394275 -0.9264871  
H 1.5344217 -1.2653569 -2.1902520  
C -1.9306222 -0.9943950 1.5207331  
W -1.0167351 0.1192104 0.0023759  
O -2.5752861 -1.4740706 2.3488413  
C -2.6324698 1.2769251 0.3529194  
C -0.7072826 1.5749232 -1.4325287  
C 0.0622291 1.1832319 1.4117179  
C -2.0461126 -0.9531858 -1.4284551  
O -3.5961055 1.8911355 0.5826104  
O -0.6397601 2.4292613 -2.2062911  
O 0.6500268 1.7923438 2.1940629  
O -2.6500957 -1.5146799 -2.2363045  
C 3.0612326 -0.3119477 -0.3981572

|   |            |            |            |
|---|------------|------------|------------|
| C | 3.9908613  | 0.2263163  | -1.3028878 |
| C | 3.4147129  | -0.4980602 | 0.9462115  |
| C | 5.2738467  | 0.5478611  | -0.8662583 |
| H | 3.7174349  | 0.3809522  | -2.3440324 |
| C | 4.7005573  | -0.1721682 | 1.3745426  |
| H | 2.6820801  | -0.9071604 | 1.6360865  |
| C | 5.6300651  | 0.3508381  | 0.4718611  |
| H | 5.9968999  | 0.9516714  | -1.5690654 |
| H | 4.9784353  | -0.3283753 | 2.4129631  |
| H | 6.6304507  | 0.6057347  | 0.8091666  |
| N | 0.5280714  | -1.5379873 | 0.1380169  |
| C | 0.2838079  | -2.9769778 | 0.0360051  |
| H | -0.3703052 | -3.2871374 | 0.8563385  |
| H | -0.1996391 | -3.2600060 | -0.9107500 |
| H | 1.2284646  | -3.5271973 | 0.1219329  |

**4ce\*** : W(CO)<sub>5</sub>]PPhNMe\* radical complex  
29

Energy = -1302.772221315

|   |            |            |            |
|---|------------|------------|------------|
| P | 2.0875288  | -0.8706881 | -0.6690826 |
| H | 1.7859024  | -1.2828652 | 0.6497990  |
| C | -1.6508372 | 1.7663013  | -0.1302446 |
| W | -1.2139998 | -0.2494152 | -0.0054100 |
| O | -1.9498651 | 2.8810188  | -0.1735985 |
| C | -3.0144199 | -0.5014968 | 0.8959980  |
| C | -0.9105945 | -2.2858169 | 0.1819538  |
| C | -2.1419527 | -0.5179595 | -1.8352093 |
| C | -0.3738362 | -0.0045040 | 1.8651500  |
| O | -4.0471556 | -0.6414708 | 1.4101068  |
| O | -0.8025595 | -3.4274155 | 0.3198357  |
| O | -2.7096069 | -0.6734193 | -2.8283896 |
| O | 0.0593694  | 0.1236621  | 2.9282990  |
| C | 3.4091577  | 0.3519421  | -0.3302934 |
| C | 4.6203833  | 0.2596946  | -1.0283485 |
| C | 3.2208288  | 1.3903341  | 0.5968759  |
| C | 5.6374829  | 1.1877358  | -0.7951047 |
| H | 4.7655082  | -0.5378568 | -1.7521881 |
| C | 4.2346289  | 2.3173591  | 0.8240120  |
| H | 2.2808595  | 1.4697090  | 1.1361057  |
| C | 5.4441973  | 2.2153567  | 0.1286295  |
| H | 6.5757057  | 1.1098795  | -1.3366384 |
| H | 4.0862398  | 3.1175162  | 1.5435320  |
| H | 6.2336794  | 2.9394304  | 0.3081808  |
| N | 0.6988004  | 0.0815175  | -0.9535580 |
| C | 0.8715206  | 1.0613274  | -2.0373504 |
| H | 0.0018203  | 1.0438785  | -2.6996894 |
| H | 0.9533623  | 2.0662804  | -1.6046834 |
| H | 1.7762674  | 0.8711401  | -2.6261281 |

**4chc\_ts** : N-C cyclization [W(CO)<sub>5</sub>]PPhNH\*  
26

Energy = -1263.409972840

|   |            |            |            |
|---|------------|------------|------------|
| P | -0.8926111 | 0.6584690  | -1.2359853 |
| C | -0.3364991 | 0.3154548  | -2.9170719 |
| H | -1.7618097 | 1.7476325  | -1.4416719 |
| N | -1.9764968 | -0.5888340 | -0.7230053 |
| C | -1.2166277 | 0.4803277  | -3.9998083 |
| C | 0.9730217  | -0.1316862 | -3.1413025 |
| C | -0.7892401 | 0.1795807  | -5.2909712 |
| H | -2.2283246 | 0.8391394  | -3.8312444 |
| C | 1.3954899  | -0.4286330 | -4.4361205 |
| H | 1.6579559  | -0.2332263 | -2.3051026 |
| C | 0.5143477  | -0.2760971 | -5.5084963 |
| H | -1.4702508 | 0.3040645  | -6.1274983 |
| H | 2.4113080  | -0.7710299 | -4.6082219 |
| H | 0.8451483  | -0.5051826 | -6.5172159 |
| W | 0.2094932  | 0.1244699  | 0.9283660  |
| C | 0.6206379  | -0.6521890 | 2.7645554  |
| C | -0.8528008 | 1.6968553  | 1.7272293  |
| C | 1.2831380  | -1.4339075 | 0.1238482  |
| C | 1.9245897  | 1.2453663  | 1.0590636  |
| C | -1.6482515 | -1.0076326 | 0.9360303  |
| O | 0.8137894  | -1.1170748 | 3.8058286  |
| O | -1.4478328 | 2.5838871  | 2.1661771  |
| O | 1.9016872  | -2.3162224 | -0.2969455 |
| O | 2.8884452  | 1.8777017  | 1.1640857  |
| O | -2.4440319 | -1.7342843 | 1.4203528  |
| H | -1.8599594 | -1.4575752 | -1.2593555 |

**4chc\*** : [W(CO)<sub>5</sub>]PPhNH\* with a CO in ring  
26

Energy = -1263.436572948

|   |            |            |            |
|---|------------|------------|------------|
| P | -2.4689059 | 1.0161042  | 0.2160313  |
| C | -2.6567692 | 2.0541899  | 1.6777816  |
| H | -2.3859569 | 2.0086360  | -0.7796284 |
| N | -0.9209903 | 0.2804119  | 0.2116170  |
| C | -2.2523453 | 3.3985706  | 1.6422197  |
| C | -3.2048699 | 1.5206641  | 2.8534749  |
| C | -2.3766728 | 4.1919708  | 2.7811860  |
| H | -1.8436024 | 3.8205773  | 0.7280134  |
| C | -3.3247996 | 2.3176553  | 3.9895585  |
| H | -3.5437052 | 0.4898505  | 2.8745079  |
| C | -2.9087279 | 3.6509047  | 3.9540847  |
| H | -2.0629734 | 5.2310728  | 2.7523688  |
| H | -3.7498856 | 1.9028588  | 4.8984184  |
| H | -3.0078475 | 4.2718889  | 4.8395150  |
| W | -3.4307437 | -1.2929846 | -0.2425522 |
| C | -4.0235783 | -3.1932993 | -0.7017917 |
| C | -3.4040492 | -0.7856815 | -2.2338946 |
| C | -3.2813601 | -1.8860204 | 1.7119596  |
| C | -5.2585120 | -0.4996619 | 0.0928912  |
| C | -1.1894452 | -1.0355420 | -0.1203261 |

|   |            |            |            |
|---|------------|------------|------------|
| O | -4.3876311 | -4.2609312 | -0.9668290 |
| O | -3.3743124 | -0.5032499 | -3.3557921 |
| O | -3.1797845 | -2.2548759 | 2.8055127  |
| O | -6.2742800 | 0.0110438  | 0.3232758  |
| O | -0.3421088 | -1.8968570 | -0.3184004 |
| H | 0.0178818  | 0.6758111  | 0.2905150  |

**4che\_ts** : 1,2-W-shift of [W(CO)<sub>5</sub>]PPhNH<sup>•</sup>  
26

Energy = -1263.421354208

|   |            |            |            |
|---|------------|------------|------------|
| P | 1.2089239  | -0.8546123 | -0.9736002 |
| H | 1.3811261  | -1.5644924 | -2.1890615 |
| C | -1.8819097 | -1.0505848 | 1.7222795  |
| W | -1.0917158 | 0.0135456  | 0.1018094  |
| O | -2.4348348 | -1.5267144 | 2.6137779  |
| C | -2.6335043 | 1.2413530  | 0.5343000  |
| C | -0.8109657 | 1.3987686  | -1.4092468 |
| C | 0.1274309  | 1.0859832  | 1.3824306  |
| C | -2.2465888 | -1.0845570 | -1.2050964 |
| O | -3.5442185 | 1.9054400  | 0.8176258  |
| O | -0.7475022 | 2.2157043  | -2.2214573 |
| O | 0.7925081  | 1.7063898  | 2.0905266  |
| O | -2.8971936 | -1.6876166 | -1.9428701 |
| C | 2.8978364  | -0.4688697 | -0.4589131 |
| C | 3.7685204  | 0.1965938  | -1.3374025 |
| C | 3.2994629  | -0.7380207 | 0.8569896  |
| C | 5.0426844  | 0.5586567  | -0.9072434 |
| H | 3.4552923  | 0.4220413  | -2.3542562 |
| C | 4.5742085  | -0.3654399 | 1.2816841  |
| H | 2.6099786  | -1.2443566 | 1.5261490  |
| C | 5.4465804  | 0.2809689  | 0.4030872  |
| H | 5.7207123  | 1.0603726  | -1.5916883 |
| H | 4.8878111  | -0.5823921 | 2.2989456  |
| H | 6.4386797  | 0.5705527  | 0.7371241  |
| N | 0.4355308  | -1.7267977 | 0.1851415  |
| H | 0.0930044  | -2.6424989 | -0.1030959 |

**4che<sup>•</sup>** : PPhNH[W(CO)<sub>5</sub>]<sup>•</sup> radical complex  
26

Energy = -1263.440193777

|   |            |            |            |
|---|------------|------------|------------|
| P | 2.1605517  | -0.8518884 | -0.9305539 |
| H | 1.9526874  | -1.4988107 | 0.3125098  |
| C | -1.4013707 | 1.7819134  | 0.0605226  |
| W | -1.1468186 | -0.2715207 | 0.0282113  |
| O | -1.5886929 | 2.9196451  | 0.1009807  |
| C | -2.8757793 | -0.4145336 | 1.0871421  |
| C | -1.0078487 | -2.3379479 | 0.0558723  |
| C | -2.2387110 | -0.3046319 | -1.7301449 |
| C | -0.1298002 | -0.2619058 | 1.8288488  |
| O | -3.8631757 | -0.4897761 | 1.6943110  |
| O | -0.9775151 | -3.4901573 | 0.1062677  |

|   |            |            |            |
|---|------------|------------|------------|
| O | -2.8910232 | -0.3227260 | -2.6815395 |
| O | 0.3982223  | -0.2675543 | 2.8550895  |
| C | 3.4025203  | 0.4077915  | -0.4493875 |
| C | 4.7518713  | 0.1796731  | -0.7552154 |
| C | 3.0295904  | 1.5934809  | 0.2023413  |
| C | 5.7202497  | 1.1148209  | -0.3883884 |
| H | 5.0426298  | -0.7274865 | -1.2790816 |
| C | 3.9983619  | 2.5318242  | 0.5533321  |
| H | 1.9833894  | 1.7738115  | 0.4328008  |
| C | 5.3440960  | 2.2923255  | 0.2614856  |
| H | 6.7650601  | 0.9299949  | -0.6208008 |
| H | 3.7056982  | 3.4480673  | 1.0584582  |
| H | 6.0973079  | 3.0246335  | 0.5374947  |
| N | 0.6978272  | -0.0149187 | -1.0263642 |
| H | 0.7283825  | 0.6581213  | -1.7949101 |

**4chp\_ts** : P/N 1,2-H-shift [W(CO)<sub>5</sub>]PPhNH<sup>•</sup>  
26

Energy = -1263.386481788

|   |            |            |            |
|---|------------|------------|------------|
| P | 1.1676257  | -1.1291210 | -0.3914075 |
| H | 1.2387433  | -2.2068688 | -1.4736481 |
| C | -1.3693513 | -1.3157716 | 1.4807556  |
| W | -0.9512131 | 0.0991805  | 0.0353083  |
| O | -1.6037058 | -2.1094486 | 2.2838223  |
| C | -2.6960788 | 1.0509924  | 0.4536652  |
| C | -0.5285153 | 1.4861719  | -1.4299611 |
| C | 0.0093721  | 1.2607844  | 1.4418497  |
| C | -1.8906804 | -1.1002898 | -1.3593257 |
| O | -3.6900899 | 1.5897058  | 0.7049036  |
| O | -0.3004730 | 2.2675292  | -2.2501677 |
| O | 0.5404833  | 1.9078943  | 2.2371640  |
| O | -2.4149332 | -1.7744751 | -2.1352964 |
| C | 2.7983621  | -0.3908900 | -0.1635477 |
| C | 2.9186973  | 1.0044468  | -0.2951154 |
| C | 3.9429627  | -1.1549168 | 0.1192344  |
| C | 4.1586669  | 1.6203111  | -0.1552904 |
| H | 2.0383253  | 1.6038802  | -0.5059779 |
| C | 5.1797514  | -0.5325104 | 0.2693562  |
| H | 3.8775641  | -2.2334073 | 0.2315113  |
| C | 5.2915080  | 0.8533448  | 0.1288876  |
| H | 4.2406818  | 2.6975271  | -0.2628559 |
| H | 6.0575767  | -1.1302741 | 0.4957590  |
| H | 6.2583648  | 1.3341417  | 0.2432286  |
| N | 1.1834157  | -2.8320049 | -0.1463219 |
| H | 2.1482697  | -3.1872379 | -0.0742184 |

**4chp<sup>•</sup>** : [W(CO)<sub>5</sub>]PPhNH<sub>2</sub><sup>•</sup> radical complex  
26

Energy = -1263.468519983

|   |           |            |            |
|---|-----------|------------|------------|
| P | 1.2095522 | -0.9657569 | -0.7504495 |
| H | 0.5324695 | -3.1766056 | -0.6240209 |

|   |            |            |            |
|---|------------|------------|------------|
| C | -1.1174485 | -1.4079161 | 1.3521335  |
| W | -0.9310565 | 0.1127305  | -0.0281280 |
| O | -1.2146930 | -2.2610418 | 2.1244289  |
| C | -2.6396137 | 0.9456477  | 0.6719995  |
| C | -0.7223432 | 1.6312635  | -1.4113004 |
| C | 0.1756978  | 1.2118902  | 1.3221714  |
| C | -1.9869939 | -1.0062292 | -1.4008946 |
| O | -3.6128364 | 1.4110941  | 1.0991021  |
| O | -0.6136739 | 2.4889050  | -2.1780136 |
| O | 0.8017355  | 1.8211793  | 2.0766097  |
| O | -2.5834922 | -1.6304259 | -2.1697165 |
| C | 2.8104659  | -0.3010144 | -0.2935747 |
| C | 3.0508013  | 1.0585729  | -0.5785205 |
| C | 3.8293176  | -1.0642465 | 0.3071521  |
| C | 4.2745502  | 1.6389430  | -0.2666156 |
| H | 2.2723986  | 1.6559874  | -1.0469114 |
| C | 5.0542477  | -0.4751505 | 0.6141535  |
| H | 3.6541938  | -2.1050758 | 0.5601641  |
| C | 5.2827775  | 0.8732955  | 0.3290085  |
| H | 4.4455602  | 2.6881102  | -0.4889152 |
| H | 5.8302344  | -1.0701088 | 1.0875097  |
| H | 6.2388812  | 1.3269922  | 0.5724033  |
| N | 1.3765572  | -2.6257833 | -0.5021308 |
| H | 2.1880405  | -3.0965629 | -0.8953326 |

**4chT** : [W(CO)<sub>5</sub>]PPhNHT complex

54

Energy = -1672.277542049

|   |            |            |            |
|---|------------|------------|------------|
| P | 0.0056824  | 1.0389745  | 0.7990642  |
| N | -1.5964358 | 1.3855988  | 0.3933507  |
| C | 0.8336277  | 2.6182739  | 0.4432322  |
| H | 0.1089176  | 1.1120292  | 2.2134969  |
| N | -2.5362054 | 0.3701452  | 0.1059861  |
| C | 1.6190140  | 3.2271808  | 1.4309589  |
| C | 0.7701970  | 3.1882927  | -0.8363693 |
| C | -3.2454040 | 0.6777682  | -1.1865527 |
| C | -3.3481528 | -0.0203392 | 1.3122130  |
| C | 2.3385580  | 4.3869342  | 1.1406959  |
| H | 1.6680520  | 2.7940522  | 2.4268050  |
| C | 1.4799077  | 4.3526513  | -1.1204982 |
| H | 0.1653310  | 2.7214235  | -1.6071769 |
| C | -4.2260912 | -0.4697530 | -1.4866350 |
| C | -2.1909773 | 0.6974761  | -2.2992436 |
| C | -3.9759648 | 2.0367393  | -1.1944865 |
| C | -4.3131137 | -1.1451538 | 0.8975689  |
| C | -4.1239158 | 1.1426970  | 1.9654270  |
| C | -2.3796040 | -0.5918896 | 2.3571328  |
| C | 2.2689190  | 4.9511265  | -0.1338981 |
| H | 2.9458339  | 4.8523268  | 1.9116393  |
| H | 1.4216280  | 4.7917876  | -2.1121121 |
| C | -5.1578758 | -0.7865379 | -0.3211589 |

|   |            |            |            |
|---|------------|------------|------------|
| H | -3.6417057 | -1.3665657 | -1.7255671 |
| H | -4.7923124 | -0.1993878 | -2.3855739 |
| H | -1.5027839 | 1.5364924  | -2.1782976 |
| H | -1.6163879 | -0.2313944 | -2.2959231 |
| H | -2.6885599 | 0.7996030  | -3.2692478 |
| H | -4.3063263 | 2.2586539  | -2.2148495 |
| H | -3.3041887 | 2.8446571  | -0.8855079 |
| H | -4.8559720 | 2.0485654  | -0.5486466 |
| H | -3.7196332 | -2.0390174 | 0.6687860  |
| H | -4.9436778 | -1.3828685 | 1.7623887  |
| H | -4.9727117 | 1.4754156  | 1.3656868  |
| H | -4.5072048 | 0.8134401  | 2.9370131  |
| H | -3.4730776 | 2.0042387  | 2.1524530  |
| H | -1.7205058 | -1.3341205 | 1.8986038  |
| H | -1.7695976 | 0.1889148  | 2.8211041  |
| H | -2.9520235 | -1.0777715 | 3.1539336  |
| H | 2.8255367  | 5.8562344  | -0.3590454 |
| H | -5.8149476 | -1.6238575 | -0.5826343 |
| H | -5.8105021 | 0.0677993  | -0.1021755 |
| W | 1.1663618  | -1.0071152 | -0.1118079 |
| C | 1.1086870  | -1.7890109 | 1.7902254  |
| C | 2.9226441  | -0.0415126 | 0.3453307  |
| C | -0.5532842 | -2.0568009 | -0.5786086 |
| C | 1.2188907  | -0.1562529 | -1.9868521 |
| C | 2.2402038  | -2.5928611 | -0.7649307 |
| O | 1.0787884  | -2.2132947 | 2.8657609  |
| O | 3.9223032  | 0.4837662  | 0.5958564  |
| O | -1.4479481 | -2.7350081 | -0.8512338 |
| O | 1.2766559  | 0.3178881  | -3.0401356 |
| O | 2.8656275  | -3.4990532 | -1.1336217 |
| H | -1.9775622 | 2.2520320  | 0.7787802  |

**4ch<sup>-</sup>** : [W(CO)<sub>5</sub>]PPhNH<sup>-</sup> anion complex

26

Energy = -1263.588442779

|   |            |            |            |
|---|------------|------------|------------|
| P | 0.3649561  | -0.6401056 | -1.3193477 |
| H | 0.7870693  | 0.2779200  | -2.3324812 |
| C | -2.0673461 | -1.7555031 | 0.4245721  |
| W | -1.9813632 | 0.0762427  | -0.5031258 |
| O | -2.0864581 | -2.7892399 | 0.9503237  |
| C | -3.8424168 | 0.5925835  | 0.0698095  |
| C | -1.6389004 | 1.8575772  | -1.4595275 |
| C | -1.1758543 | 0.8540158  | 1.2204644  |
| C | -2.6816855 | -0.7431887 | -2.2533107 |
| O | -4.9235367 | 0.8964439  | 0.3927776  |
| O | -1.3956705 | 2.8533255  | -2.0046719 |
| O | -0.7220943 | 1.2876017  | 2.1946399  |
| O | -3.0750042 | -1.2078649 | -3.2410362 |
| C | 1.6417450  | -0.1391465 | -0.0962254 |
| C | 2.0395420  | 1.1986466  | 0.0297156  |
| C | 2.1777073  | -1.0943584 | 0.7735874  |

|   |            |            |            |
|---|------------|------------|------------|
| C | 2.9501336  | 1.5773552  | 1.0147392  |
| H | 1.6305031  | 1.9478099  | -0.6465592 |
| C | 3.0910461  | -0.7179728 | 1.7611777  |
| H | 1.8746844  | -2.1320775 | 0.6533022  |
| C | 3.4772259  | 0.6184367  | 1.8861081  |
| H | 3.2521988  | 2.6180064  | 1.1039548  |
| H | 3.5034720  | -1.4673412 | 2.4326493  |
| H | 4.1877924  | 0.9125487  | 2.6542039  |
| N | 0.6432932  | -2.1632907 | -1.7877173 |
| H | -0.2284496 | -2.6907560 | -1.7360815 |

**4ch\*** : [W(CO)<sub>5</sub>]PPhNH\* radical complex  
26

Energy = -1263.432582703

|   |            |            |            |
|---|------------|------------|------------|
| P | 0.4172739  | -0.3689539 | -1.2881496 |
| H | 0.8431065  | 0.4129791  | -2.3889149 |
| C | -2.0326227 | -1.8769389 | 0.4485631  |
| W | -1.9801290 | -0.0467328 | -0.5244704 |
| O | -2.0728206 | -2.8857546 | 1.0048403  |
| C | -3.8385496 | 0.4407275  | 0.1192631  |
| C | -1.8776324 | 1.7592243  | -1.5103468 |
| C | -1.1950853 | 0.7887672  | 1.1919863  |
| C | -2.7428317 | -0.9036374 | -2.2389909 |
| O | -4.8931128 | 0.7510979  | 0.4854144  |
| O | -1.8065505 | 2.7662274  | -2.0706185 |
| O | -0.7562372 | 1.2517723  | 2.1525443  |
| O | -3.1815500 | -1.3790258 | -3.1959310 |
| C | 1.6997683  | -0.0346071 | -0.0636794 |
| C | 2.3263161  | 1.2178924  | -0.0485669 |
| C | 1.9918408  | -0.9809908 | 0.9272724  |
| C | 3.2494981  | 1.5193800  | 0.9525520  |
| H | 2.0996076  | 1.9542478  | -0.8158595 |
| C | 2.9197389  | -0.6746764 | 1.9208815  |
| H | 1.5016437  | -1.9498087 | 0.9105829  |
| C | 3.5460782  | 0.5744393  | 1.9365684  |
| H | 3.7381420  | 2.4891138  | 0.9604823  |
| H | 3.1534870  | -1.4107621 | 2.6844312  |
| H | 4.2656641  | 0.8102640  | 2.7151018  |
| N | 0.4392527  | -1.9903613 | -1.5929766 |
| H | -0.0117065 | -2.2062150 | -2.4900391 |

**4cp\_ts** : P/N 1,2-H-shift of [W(CO)<sub>5</sub>]PPhNH\*  
29

Energy = -1302.716888217

|   |            |            |            |
|---|------------|------------|------------|
| P | 1.1279422  | -0.9749990 | -0.3800691 |
| H | 1.4254316  | -2.2262270 | -1.2359691 |
| C | -1.8911688 | -1.7573779 | 0.3394965  |
| W | -1.0836925 | 0.1096055  | -0.0234435 |
| O | -2.3479637 | -2.7969818 | 0.5417219  |
| C | -2.8631194 | 1.0055611  | 0.3624742  |
| C | -0.2352063 | 1.9415195  | -0.4252344 |

|   |            |            |            |
|---|------------|------------|------------|
| C | -0.5956182 | 0.2699889  | 1.9718383  |
| C | -1.5840448 | -0.0795603 | -2.0216077 |
| O | -3.8730878 | 1.5212033  | 0.6017667  |
| O | 0.2368865  | 2.9703670  | -0.6569603 |
| O | -0.3276459 | 0.3569614  | 3.0928737  |
| O | -1.8724126 | -0.1858302 | -3.1338178 |
| C | 2.6879248  | -0.0662373 | -0.2212359 |
| C | 2.8174281  | 0.9521717  | 0.7365074  |
| C | 3.7824520  | -0.3806396 | -1.0456242 |
| C | 4.0232327  | 1.6367482  | 0.8746820  |
| H | 1.9759227  | 1.2078897  | 1.3731756  |
| C | 4.9852028  | 0.3089831  | -0.9062220 |
| H | 3.6848626  | -1.1522945 | -1.8047068 |
| C | 5.1071591  | 1.3158821  | 0.0545722  |
| H | 4.1158917  | 2.4203806  | 1.6204823  |
| H | 5.8244152  | 0.0650972  | -1.5508892 |
| H | 6.0444519  | 1.8542399  | 0.1596686  |
| N | 1.3180144  | -2.6230961 | 0.1242630  |
| C | 2.5748855  | -3.0811626 | 0.7192614  |
| H | 2.6353828  | -4.1683138 | 0.6257857  |
| H | 3.4724761  | -2.6266473 | 0.2828631  |
| H | 2.5571939  | -2.8165346 | 1.7861468  |

**4cp\*** : [W(CO)<sub>5</sub>]PPhNH<sub>2</sub>\* radical complex  
29

Energy = -1302.798375882

|   |            |            |            |
|---|------------|------------|------------|
| P | 1.0639649  | -0.9906266 | -0.7021225 |
| N | 1.2802386  | -2.6193223 | -0.3440802 |
| C | 2.6746222  | -0.2810399 | -0.3226840 |
| C | 3.6378239  | -0.9119879 | 0.4852834  |
| C | 2.9638112  | 0.9839693  | -0.8700683 |
| C | 4.8602496  | -0.2892650 | 0.7325027  |
| H | 3.4218598  | -1.8720161 | 0.9443513  |
| C | 4.1827059  | 1.6022144  | -0.6132156 |
| H | 2.2288249  | 1.4782119  | -1.5009233 |
| C | 5.1373426  | 0.9661335  | 0.1867902  |
| H | 5.5934338  | -0.7816458 | 1.3651621  |
| H | 4.3917990  | 2.5788482  | -1.0398640 |
| H | 6.0898447  | 1.4483284  | 0.3856063  |
| W | -1.0149993 | 0.2096093  | 0.0749807  |
| C | -1.1168736 | -1.1039957 | 1.6601492  |
| C | -2.2345012 | -1.0035870 | -1.0603377 |
| C | 0.2369806  | 1.4158612  | 1.1839375  |
| C | -0.8746333 | 1.5404241  | -1.4961321 |
| C | -2.6223832 | 1.1957275  | 0.8019384  |
| O | -1.1614126 | -1.8306283 | 2.5574260  |
| O | -2.9293493 | -1.6719110 | -1.6994284 |
| O | 0.9385754  | 2.0879096  | 1.8075750  |
| O | -0.8007210 | 2.2971295  | -2.3665470 |
| O | -3.5385306 | 1.7543889  | 1.2455285  |
| C | 0.2032554  | -3.6085743 | -0.3994564 |

|   |            |            |            |
|---|------------|------------|------------|
| H | -0.7323665 | -3.1330661 | -0.1004990 |
| H | 0.0818594  | -4.0258594 | -1.4060121 |
| H | 0.4245385  | -4.4189805 | 0.3001031  |
| H | 2.2051288  | -2.9985989 | -0.5304043 |

**4cT** : [W(CO)<sub>5</sub>]PPhNHT complex

57

Energy = -1711.600623368

|   |            |            |            |
|---|------------|------------|------------|
| P | -0.0507664 | 1.0832858  | 0.7675512  |
| N | -1.6692607 | 1.5465309  | 0.5322960  |
| C | 0.8916517  | 2.5872746  | 0.3473566  |
| H | 0.1317784  | 1.1826141  | 2.1752308  |
| N | -2.6257901 | 0.5594089  | 0.1994155  |
| C | 1.6042350  | 3.2710373  | 1.3406111  |
| C | 0.9693761  | 3.0288258  | -0.9814282 |
| C | -3.2940372 | 0.8162551  | -1.1210916 |
| C | -3.4055688 | -0.0092810 | 1.3504653  |
| C | 2.3882732  | 4.3772170  | 1.0103483  |
| H | 1.5458702  | 2.9372865  | 2.3734547  |
| C | 1.7408971  | 4.1413823  | -1.3078902 |
| H | 0.4265532  | 2.5023529  | -1.7595792 |
| C | -4.0823373 | -0.4511828 | -1.5093435 |
| C | -2.1961667 | 1.0151074  | -2.1723582 |
| C | -4.2234927 | 2.0500832  | -1.1818922 |
| C | -4.1461455 | -1.2582966 | 0.8335856  |
| C | -4.4333826 | 0.9258947  | 2.0361802  |
| C | -2.3988255 | -0.4585064 | 2.4146792  |
| C | 2.4554242  | 4.8150440  | -0.3128610 |
| H | 2.9402051  | 4.8988058  | 1.7870215  |
| H | 1.7918546  | 4.4795772  | -2.3387777 |
| C | -4.9944608 | -0.9657165 | -0.4004396 |
| H | -3.3634099 | -1.2372384 | -1.7644723 |
| H | -4.6532520 | -0.2230003 | -2.4168976 |
| H | -1.6791824 | 1.9671705  | -2.0320871 |
| H | -1.4663975 | 0.2040004  | -2.1120045 |
| H | -2.6457787 | 1.0123469  | -3.1708368 |
| H | -4.6404239 | 2.1222263  | -2.1928374 |
| H | -3.6699010 | 2.9733436  | -0.9925106 |
| H | -5.0589933 | 1.9905997  | -0.4816745 |
| H | -3.4045136 | -2.0246262 | 0.5830278  |
| H | -4.7605305 | -1.6486180 | 1.6533006  |
| H | -5.1902861 | 1.3015383  | 1.3457528  |
| H | -4.9501592 | 0.3510386  | 2.8130670  |
| H | -3.9552154 | 1.7766382  | 2.5234681  |
| H | -1.6339173 | -1.0977363 | 1.9643744  |
| H | -1.9109450 | 0.3920984  | 2.9019687  |
| H | -2.9185356 | -1.0304826 | 3.1898644  |
| H | 3.0624007  | 5.6782364  | -0.5702486 |
| H | -5.5065864 | -1.8770387 | -0.7304044 |
| H | -5.7760065 | -0.2317011 | -0.1674281 |
| W | 1.0739870  | -1.0084894 | -0.1298893 |

|   |            |            |            |
|---|------------|------------|------------|
| C | 0.9896832  | -1.7696746 | 1.7811658  |
| C | 2.8261740  | -0.0361600 | 0.3393374  |
| C | -0.6099940 | -2.0812034 | -0.6471310 |
| C | 1.1882198  | -0.2390399 | -2.0364080 |
| C | 2.1734001  | -2.5987495 | -0.7144894 |
| O | 0.9597077  | -2.1963805 | 2.8553363  |
| O | 3.8290475  | 0.4821329  | 0.5882766  |
| O | -1.4805614 | -2.7717406 | -0.9647247 |
| O | 1.2880524  | 0.1622711  | -3.1167887 |
| O | 2.8155982  | -3.5091263 | -1.0420912 |
| C | -2.0564321 | 2.8081270  | 1.2024016  |
| H | -1.9509189 | 2.7400396  | 2.2950375  |
| H | -1.4146087 | 3.6166696  | 0.8415478  |
| H | -3.0888375 | 3.0434877  | 0.9588149  |

**4c<sup>-</sup>** : [W(CO)<sub>5</sub>]PPhNH<sup>-</sup> anion complex

29

Energy = -1302.912924301

|   |            |            |            |
|---|------------|------------|------------|
| P | 0.4060449  | -0.4977557 | -1.3985899 |
| H | 0.7514894  | 0.5197009  | -2.3614128 |
| C | -2.2478310 | -1.8144418 | 0.1027064  |
| W | -1.9867828 | 0.1162856  | -0.5582249 |
| O | -2.3849724 | -2.8909204 | 0.5138195  |
| C | -3.8272681 | 0.6512252  | 0.0456408  |
| C | -1.5379945 | 2.0088107  | -1.2008673 |
| C | -1.1671493 | 0.5592443  | 1.2729454  |
| C | -2.6611078 | -0.3779405 | -2.4354655 |
| O | -4.8979815 | 0.9744127  | 0.3864982  |
| O | -1.2462395 | 3.0729574  | -1.5645672 |
| O | -0.7054664 | 0.8015904  | 2.3089131  |
| O | -3.0362548 | -0.6400917 | -3.5033258 |
| C | 1.6652669  | -0.0246454 | -0.1616219 |
| C | 1.9739778  | 1.3223058  | 0.0685635  |
| C | 2.2698486  | -1.0099399 | 0.6253070  |
| C | 2.8686909  | 1.6798432  | 1.0761939  |
| H | 1.5101587  | 2.0939215  | -0.5429411 |
| C | 3.1687741  | -0.6535264 | 1.6330680  |
| H | 2.0253444  | -2.0491810 | 0.4228039  |
| C | 3.4673583  | 0.6911803  | 1.8634463  |
| H | 3.1013993  | 2.7277466  | 1.2481491  |
| H | 3.6361561  | -1.4253688 | 2.2398423  |
| H | 4.1645290  | 0.9691852  | 2.6496247  |
| N | 0.7986185  | -1.9870629 | -1.8565220 |
| C | -0.1891862 | -2.8153523 | -2.5220880 |
| H | 0.0514792  | -3.8763431 | -2.3623225 |
| H | -1.2170385 | -2.6565452 | -2.1443721 |
| H | -0.2343985 | -2.6576351 | -3.6159500 |

**4c<sup>•</sup>** : [W(CO)<sub>5</sub>]PPhNH<sup>•</sup> radical complex

29

Energy = -1302.767801792

|   |            |            |            |
|---|------------|------------|------------|
| P | 0.3080452  | -0.3440625 | -1.2680478 |
| H | 0.7011242  | 0.4737619  | -2.3583323 |
| C | -2.0091964 | -1.8447747 | 0.4968445  |
| W | -2.0525974 | 0.0041923  | -0.4240653 |
| O | -1.9856499 | -2.8749474 | 1.0177384  |
| C | -3.9052051 | 0.4000963  | 0.2944792  |
| C | -2.0093591 | 1.8290234  | -1.3760346 |
| C | -1.2363862 | 0.8456836  | 1.2747504  |
| C | -2.8624120 | -0.8436533 | -2.1175552 |
| O | -4.9621176 | 0.6411036  | 0.7057423  |
| O | -1.9658508 | 2.8481711  | -1.9188526 |
| O | -0.7840653 | 1.3157996  | 2.2264346  |
| O | -3.3356746 | -1.3173258 | -3.0600702 |
| C | 1.6277987  | -0.0252112 | -0.0721889 |
| C | 2.3316641  | 1.1837414  | -0.1260805 |
| C | 1.8747686  | -0.9383017 | 0.9616716  |
| C | 3.2832809  | 1.4765356  | 0.8517110  |
| H | 2.1425032  | 1.8931830  | -0.9277948 |
| C | 2.8330385  | -0.6433584 | 1.9290865  |
| H | 1.3267908  | -1.8751364 | 1.0002747  |
| C | 3.5345204  | 0.5643462  | 1.8776987  |
| H | 3.8300700  | 2.4137577  | 0.8068993  |
| H | 3.0306079  | -1.3547751 | 2.7255175  |
| H | 4.2771441  | 0.7926701  | 2.6365905  |
| N | 0.4809889  | -1.9418973 | -1.7114483 |
| C | 0.0813406  | -2.3528782 | -3.0441045 |
| H | -0.7720768 | -3.0407877 | -2.9693489 |
| H | -0.1717505 | -1.5357226 | -3.7319992 |
| H | 0.9081203  | -2.9375739 | -3.4702651 |

**4de\_ts** : 1,2-W-shift of [W(CO)<sub>5</sub>]PPhPH•  
29

Energy = -1589.386409459

|   |            |            |            |
|---|------------|------------|------------|
| P | 1.3594992  | 0.5486244  | -1.1810557 |
| H | 1.6838471  | 1.2823883  | -2.3494368 |
| C | -0.5072183 | -1.6691801 | 1.1690797  |
| W | -0.9384592 | 0.1285117  | 0.2502432  |
| O | -0.2848507 | -2.6761354 | 1.6867557  |
| C | -2.3638638 | 0.4425970  | 1.6246359  |
| C | -1.4128997 | 1.9289947  | -0.6573038 |
| C | 0.3402226  | 1.0464415  | 1.6044600  |
| C | -2.4454145 | -0.7594402 | -0.8562895 |
| O | -3.2144966 | 0.5877311  | 2.4063832  |
| O | -1.7063048 | 2.9403290  | -1.1303334 |
| O | 0.9792761  | 1.5726094  | 2.4083922  |
| O | -3.3197073 | -1.2611174 | -1.4178047 |
| C | 2.9626716  | 0.1805045  | -0.4302498 |
| C | 4.0548009  | 1.0280200  | -0.6706861 |
| C | 3.1026657  | -0.9026765 | 0.4494718  |
| C | 5.2772558  | 0.7797992  | -0.0470818 |
| H | 3.9539965  | 1.8721622  | -1.3472471 |

|   |            |            |            |
|---|------------|------------|------------|
| C | 4.3262621  | -1.1425005 | 1.0703471  |
| H | 2.2621053  | -1.5648225 | 0.6364192  |
| C | 5.4155000  | -0.3025916 | 0.8245518  |
| H | 6.1217289  | 1.4334204  | -0.2448536 |
| H | 4.4299512  | -1.9877342 | 1.7442921  |
| H | 6.3680597  | -0.4916878 | 1.3103253  |
| P | 0.3403065  | -1.2559636 | -1.7703720 |
| C | -0.4519454 | -0.5944233 | -3.3353528 |
| H | -1.3017714 | -1.2395391 | -3.5759642 |
| H | -0.8110638 | 0.4332753  | -3.2363742 |
| H | 0.2745124  | -0.6534435 | -4.1517264 |

**4de\*** : PPhPH[W(CO)<sub>5</sub>]• radical complex  
29

Energy = -1589.404720464

|   |            |            |            |
|---|------------|------------|------------|
| P | 2.2735624  | -0.8308370 | -0.1631713 |
| H | 2.0478803  | -0.9820969 | 1.2265602  |
| C | -2.3917259 | 1.7235885  | -0.1278218 |
| W | -1.7150370 | -0.2090238 | 0.1358317  |
| O | -2.7761249 | 2.8021189  | -0.2780047 |
| C | -3.6043939 | -0.8503004 | 0.5162946  |
| C | -1.0202202 | -2.1336707 | 0.4013426  |
| C | -1.9947655 | -0.5528838 | -1.8785759 |
| C | -1.3631982 | 0.1473142  | 2.1413468  |
| O | -4.6833643 | -1.2261312 | 0.7133257  |
| O | -0.6366631 | -3.2119929 | 0.5540993  |
| O | -2.1324138 | -0.7387652 | -3.0097036 |
| O | -1.1628920 | 0.3400491  | 3.2618043  |
| C | 3.6908031  | 0.3280242  | -0.1211881 |
| C | 4.4924586  | 0.4294114  | -1.2681224 |
| C | 3.9910343  | 1.1159600  | 1.0013792  |
| C | 5.5719442  | 1.3140567  | -1.2965007 |
| H | 4.2752542  | -0.1880836 | -2.1360253 |
| C | 5.0793859  | 1.9858813  | 0.9747228  |
| H | 3.3720549  | 1.0490873  | 1.8915753  |
| C | 5.8679829  | 2.0901024  | -0.1750975 |
| H | 6.1848629  | 1.3885149  | -2.1901099 |
| H | 5.3088670  | 2.5881503  | 1.8491963  |
| H | 6.7125276  | 2.7728299  | -0.1937181 |
| P | 0.5931634  | 0.5320736  | -0.4538509 |
| C | 0.9409347  | 1.2788188  | -2.1000371 |
| H | 0.8339228  | 0.5278248  | -2.8903668 |
| H | 0.2186136  | 2.0808002  | -2.2735917 |
| H | 1.9539615  | 1.6903544  | -2.1290314 |

**4dhc\_ts** : P/C cyclization of [W(CO)<sub>5</sub>]PPhPH•  
26

Energy = -1550.055237093

|   |           |           |            |
|---|-----------|-----------|------------|
| P | 0.8612621 | 1.2016875 | -0.8797039 |
| C | 0.1416147 | 2.8107475 | -0.4152311 |
| H | 0.8613154 | 1.2550742 | -2.2909880 |

|   |            |            |            |
|---|------------|------------|------------|
| P | 2.9547141  | 1.2644162  | -0.3038242 |
| C | 0.9260321  | 3.9732252  | -0.3999135 |
| C | -1.2172597 | 2.8894513  | -0.0825356 |
| C | 0.3549427  | 5.1969919  | -0.0539878 |
| H | 1.9804733  | 3.9215037  | -0.6585541 |
| C | -1.7870986 | 4.1165307  | 0.2537406  |
| H | -1.8287500 | 1.9925473  | -0.0803549 |
| C | -1.0014235 | 5.2703125  | 0.2710241  |
| H | 0.9696989  | 6.0920996  | -0.0389925 |
| H | -2.8412928 | 4.1689323  | 0.5081819  |
| H | -1.4442313 | 6.2246451  | 0.5404691  |
| W | -0.0334300 | -0.9452347 | 0.1404895  |
| C | -0.8733441 | -2.6455398 | 0.8457155  |
| C | 0.7588358  | -1.9244428 | -1.4885624 |
| C | -0.7117473 | 0.1217924  | 1.7681609  |
| C | -1.7879586 | -0.6231722 | -0.8914465 |
| C | 1.6505291  | -1.4354337 | 1.2444098  |
| O | -1.3810995 | -3.6131769 | 1.2332445  |
| O | 1.2222401  | -2.4571322 | -2.4030274 |
| O | -1.0705515 | 0.7160891  | 2.6909632  |
| O | -2.7835410 | -0.4816682 | -1.4603211 |
| O | 2.5302341  | -1.7847187 | 1.9051317  |
| H | 3.2501157  | 0.2497425  | -1.2569033 |

**4dhc\*** : [W(CO)<sub>5</sub>]PPhPH\* with a CO in ring  
26

Energy = -1550.023134653

|   |            |            |            |
|---|------------|------------|------------|
| P | -2.2544764 | 0.9637096  | 0.4686117  |
| C | -2.6950676 | 2.0760818  | 1.8250844  |
| H | -1.9472506 | 1.8825477  | -0.5533878 |
| P | -0.3357634 | -0.0412020 | 0.9166642  |
| C | -2.3582882 | 3.4369401  | 1.7781779  |
| C | -3.3796166 | 1.5639074  | 2.9362379  |
| C | -2.7004440 | 4.2733932  | 2.8394735  |
| H | -1.8343365 | 3.8399246  | 0.9158483  |
| C | -3.7123081 | 2.4030262  | 3.9976214  |
| H | -3.6548849 | 0.5135703  | 2.9653402  |
| C | -3.3735485 | 3.7572803  | 3.9494618  |
| H | -2.4422062 | 5.3273970  | 2.7991792  |
| H | -4.2422480 | 2.0030580  | 4.8567479  |
| H | -3.6394645 | 4.4117966  | 4.7742006  |
| W | -3.3667538 | -1.2501682 | -0.1180649 |
| C | -4.1157962 | -3.0591683 | -0.6621218 |
| C | -3.4972443 | -0.5976168 | -2.0697622 |
| C | -3.1947215 | -1.9894983 | 1.7891241  |
| C | -5.1087575 | -0.3641592 | 0.3798520  |
| C | -1.1304613 | -1.3699829 | -0.1638059 |
| O | -4.5743537 | -4.0789019 | -0.9715376 |
| O | -3.5751540 | -0.2329163 | -3.1637283 |
| O | -3.1027653 | -2.4306939 | 2.8557562  |
| O | -6.0737521 | 0.1929031  | 0.7053663  |

|   |            |            |            |
|---|------------|------------|------------|
| O | -0.5791426 | -2.2394029 | -0.8004448 |
| H | 0.5527937  | 0.5652036  | -0.0112808 |

**4dhe\_ts** : P/P 1,2-W-shift of [W(CO)<sub>5</sub>]PPhPH\*  
26

Energy = -1550.041481091

|   |            |            |            |
|---|------------|------------|------------|
| P | 1.3954862  | 0.2242910  | -1.4494216 |
| H | 1.8232764  | 0.6143899  | -2.7439887 |
| C | -0.5943615 | -1.4978810 | 1.4432651  |
| W | -1.0659773 | -0.0115700 | 0.0941717  |
| O | -0.3414391 | -2.3283518 | 2.2036165  |
| C | -2.5187137 | 0.6145595  | 1.3206448  |
| C | -1.5495783 | 1.4715318  | -1.2670903 |
| C | 0.1872452  | 1.2540916  | 1.1532864  |
| C | -2.5096746 | -1.2134661 | -0.7821849 |
| O | -3.3856311 | 0.9336300  | 2.0267037  |
| O | -1.8451896 | 2.3086719  | -2.0042170 |
| O | 0.8219296  | 1.9753527  | 1.7925054  |
| O | -3.3420220 | -1.8718543 | -1.2314129 |
| C | 2.9494194  | 0.0545416  | -0.5440283 |
| C | 4.0458701  | 0.8506716  | -0.9115829 |
| C | 3.0489293  | -0.7961415 | 0.5665923  |
| C | 5.2333322  | 0.7764131  | -0.1848001 |
| H | 3.9755535  | 1.5173556  | -1.7669130 |
| C | 4.2369103  | -0.8608855 | 1.2908139  |
| H | 2.2056265  | -1.4177160 | 0.8553068  |
| C | 5.3309356  | -0.0757760 | 0.9173246  |
| H | 6.0820779  | 1.3854563  | -0.4817675 |
| H | 4.3105654  | -1.5283592 | 2.1443042  |
| H | 6.2560385  | -0.1290935 | 1.4833860  |
| P | 0.3845677  | -1.6759248 | -1.5522500 |
| H | -0.2539875 | -1.2875590 | -2.7628168 |

**4dhe\*** : PPhPH[W(CO)<sub>5</sub>]\* radical complex  
26

Energy = -1550.057638045

|   |            |            |            |
|---|------------|------------|------------|
| P | 1.7767883  | 0.4808542  | -2.0329003 |
| H | 2.4992722  | -0.5169088 | -2.7352246 |
| C | -1.0259018 | -0.5590308 | 1.0654994  |
| W | -2.0360140 | 0.1396613  | -0.6012054 |
| O | -0.5163566 | -0.9540200 | 2.0213096  |
| C | -3.5777099 | 0.7619930  | 0.5634136  |
| C | -3.0436884 | 0.7977932  | -2.2730694 |
| C | -1.1545556 | 1.9897305  | -0.3403028 |
| C | -2.9310128 | -1.7113907 | -0.8405061 |
| O | -4.4602959 | 1.1395418  | 1.2127279  |
| O | -3.6050111 | 1.1565895  | -3.2158780 |
| O | -0.6723412 | 3.0273029  | -0.1923708 |
| O | -3.4459286 | -2.7366988 | -0.9608629 |
| C | 2.2306755  | 0.0503837  | -0.3149359 |
| C | 2.2361219  | 1.0752613  | 0.6428286  |



|   |            |            |            |
|---|------------|------------|------------|
| C | 2.5717616  | -1.2559894 | 0.0705287  |
| C | 2.5685950  | 0.7965580  | 1.9690666  |
| H | 1.9864090  | 2.0907822  | 0.3489279  |
| C | 2.9129272  | -1.5275540 | 1.3935308  |
| H | 2.5646667  | -2.0565182 | -0.6637511 |
| C | 2.9087375  | -0.5030948 | 2.3444246  |
| H | 2.5661489  | 1.5951000  | 2.7051508  |
| H | 3.1751517  | -2.5404975 | 1.6851834  |
| H | 3.1699998  | -0.7199868 | 3.3760416  |
| P | -0.1835066 | -0.4631732 | -2.1535949 |
| H | -0.4044819 | -0.3415295 | -3.5473454 |

**4dhp\_ts** : P/P 1,2-H-shift of [W(CO)<sub>5</sub>]PPhPH<sup>•</sup>  
26

Energy = -1550.020612558

|   |            |            |            |
|---|------------|------------|------------|
| P | 1.1935707  | -0.9378985 | -0.2760019 |
| H | 1.2368033  | -1.9597694 | -1.5071025 |
| C | -1.3287998 | -1.1297888 | 1.6622354  |
| W | -1.0281077 | 0.1471224  | 0.0665104  |
| O | -1.4961651 | -1.8463984 | 2.5507799  |
| C | -2.8318965 | 1.0018706  | 0.4118558  |
| C | -0.7332370 | 1.4064761  | -1.5415407 |
| C | -0.1360203 | 1.5224768  | 1.3175385  |
| C | -1.8920570 | -1.2436248 | -1.1905260 |
| O | -3.8632890 | 1.4898820  | 0.6166674  |
| O | -0.5835675 | 2.1153586  | -2.4410564 |
| O | 0.3597542  | 2.2925024  | 2.0203829  |
| O | -2.3798150 | -2.0162792 | -1.8959735 |
| C | 2.7852628  | -0.1118525 | -0.0906917 |
| C | 2.8457632  | 1.2549852  | -0.4234934 |
| C | 3.9347647  | -0.7554463 | 0.3964865  |
| C | 4.0377098  | 1.9579449  | -0.2816160 |
| H | 1.9586381  | 1.7598492  | -0.7940532 |
| C | 5.1232589  | -0.0429307 | 0.5407216  |
| H | 3.8960785  | -1.8028170 | 0.6781920  |
| C | 5.1795895  | 1.3106122  | 0.1995034  |
| H | 4.0765117  | 3.0100662  | -0.5468594 |
| H | 6.0055881  | -0.5452890 | 0.9261125  |
| H | 6.1087441  | 1.8611236  | 0.3120833  |
| P | 1.3710316  | -3.1232975 | -0.2751513 |
| H | 2.7577428  | -3.1088296 | -0.5877215 |

**4dhp<sup>•</sup>** : [W(CO)<sub>5</sub>]PPhPH<sub>2</sub><sup>•</sup> radical complex  
26

Energy = -1550.060741740

|   |            |            |            |
|---|------------|------------|------------|
| P | -0.0466633 | -1.0749130 | -0.0224327 |
| C | -3.2041028 | -1.5375431 | 0.3267749  |
| W | -2.1897326 | 0.1406798  | -0.3270643 |
| O | -3.7733533 | -2.4752715 | 0.6830288  |
| C | -3.9421461 | 1.1074880  | -0.6792680 |
| C | -1.1451866 | 1.7912025  | -0.9946979 |

|   |            |            |            |
|---|------------|------------|------------|
| C | -2.1506050 | 0.9084612  | 1.5920289  |
| C | -2.2586684 | -0.6290578 | -2.2443625 |
| O | -4.9373007 | 1.6615671  | -0.8920469 |
| O | -0.5629573 | 2.7119088  | -1.3749604 |
| O | -2.1477581 | 1.3470336  | 2.6596972  |
| O | -2.3057687 | -1.0588139 | -3.3135883 |
| C | 1.5253453  | -0.3235501 | 0.4064390  |
| C | 1.5054074  | 0.9427735  | 1.0307121  |
| C | 2.7682482  | -0.9426796 | 0.1667308  |
| C | 2.6909912  | 1.5684908  | 1.3973875  |
| H | 0.5547364  | 1.4295972  | 1.2258247  |
| C | 3.9511970  | -0.3078216 | 0.5328471  |
| H | 2.8068505  | -1.9149886 | -0.3133767 |
| C | 3.9189883  | 0.9468598  | 1.1488454  |
| H | 2.6592208  | 2.5419545  | 1.8774759  |
| H | 4.9026102  | -0.7929527 | 0.3351540  |
| H | 4.8447534  | 1.4377228  | 1.4335255  |
| P | 0.2042825  | -3.0446518 | -0.9420452 |
| H | 1.1341957  | -2.6667120 | -1.9487286 |
| H | 1.2033347  | -3.5371407 | -0.0626633 |

**4dhT** : [W(CO)<sub>5</sub>]PPhPHT complex  
54

Energy = -1958.915745644

|   |            |            |            |
|---|------------|------------|------------|
| P | -0.1634274 | 1.1240336  | -0.7198769 |
| P | 2.0132774  | 1.7390541  | -0.4555737 |
| C | -0.8824828 | 2.7338722  | -0.2635539 |
| H | -0.1814592 | 1.2771426  | -2.1227500 |
| N | 2.9260813  | 0.3604237  | -0.0424383 |
| C | -0.8908109 | 3.7989177  | -1.1771366 |
| C | -1.3646125 | 2.9392687  | 1.0377974  |
| C | 3.3521321  | 0.1388000  | 1.3891471  |
| C | 3.7541217  | -0.1477900 | -1.2021592 |
| C | -1.3877663 | 5.0456216  | -0.7953475 |
| H | -0.5183542 | 3.6495123  | -2.1867173 |
| C | -1.8568326 | 4.1860697  | 1.4159441  |
| H | -1.3618306 | 2.1207810  | 1.7512830  |
| C | 3.9909424  | -1.2561509 | 1.5460759  |
| C | 2.1190405  | 0.1549276  | 2.3057043  |
| C | 4.3407150  | 1.2280456  | 1.8498698  |
| C | 4.3316618  | -1.5350401 | -0.8791211 |
| C | 4.8866292  | 0.8311567  | -1.5695232 |
| C | 2.8176869  | -0.3069412 | -2.4119762 |
| C | -1.8710150 | 5.2409780  | 0.4994313  |
| H | -1.3987679 | 5.8623458  | -1.5113971 |
| H | -2.2346740 | 4.3335568  | 2.4234946  |
| C | 5.0243443  | -1.5857809 | 0.4767912  |
| H | 3.1953955  | -2.0094590 | 1.5078617  |
| H | 4.4295446  | -1.2978316 | 2.5496457  |
| H | 1.7038157  | 1.1556042  | 2.4511596  |
| H | 1.3396418  | -0.4904365 | 1.8944069  |

|   |            |            |            |
|---|------------|------------|------------|
| H | 2.4062650  | -0.2267776 | 3.2906786  |
| H | 3.9129153  | 2.2254199  | 1.7004108  |
| H | 5.2853917  | 1.1765472  | 1.3028363  |
| H | 4.5562914  | 1.1081978  | 2.9173545  |
| H | 3.5153452  | -2.2672917 | -0.8859739 |
| H | 5.0177705  | -1.8020159 | -1.6910428 |
| H | 5.6326122  | 0.9060770  | -0.7745763 |
| H | 5.3918887  | 0.4925469  | -2.4808012 |
| H | 4.4774592  | 1.8305959  | -1.7530892 |
| H | 1.9682926  | -0.9477320 | -2.1534662 |
| H | 2.4403620  | 0.6593735  | -2.7672561 |
| H | 3.3655833  | -0.7691308 | -3.2397810 |
| H | -2.2608839 | 6.2110116  | 0.7937714  |
| H | 5.4383534  | -2.5849283 | 0.6524759  |
| H | 5.8663593  | -0.8835033 | 0.5133304  |
| W | -1.4174843 | -0.9946472 | -0.0473652 |
| C | -1.4663426 | -1.4006108 | -2.0644462 |
| C | -3.1188472 | 0.1559172  | -0.2211847 |
| C | 0.2368823  | -2.2137635 | 0.1099940  |
| C | -1.3442617 | -0.5714310 | 1.9655794  |
| C | -2.5703531 | -2.6062239 | 0.3237442  |
| O | -1.4811301 | -1.6188986 | -3.1995183 |
| O | -4.0813132 | 0.7871997  | -0.3196149 |
| O | 1.1023238  | -2.9774520 | 0.1914885  |
| O | -1.3303535 | -0.3569803 | 3.1031122  |
| O | -3.2493591 | -3.5274773 | 0.5231243  |
| H | 1.7530787  | 2.2443468  | 0.8360161  |

**4dh<sup>-</sup>** : [W(CO)<sub>5</sub>]PPhPh<sup>-</sup> anion complex  
26

Energy = -1550.201250132

|   |            |            |            |
|---|------------|------------|------------|
| P | 0.3021433  | -0.4652037 | -1.3919219 |
| H | 0.7061781  | 0.5343038  | -2.3173945 |
| C | -1.9162570 | -1.7343857 | 0.5674701  |
| W | -2.0435066 | 0.0457747  | -0.4627432 |
| O | -1.8462905 | -2.7240421 | 1.1645584  |
| C | -3.8815008 | 0.4246460  | 0.2616693  |
| C | -2.0095243 | 1.7992440  | -1.5264205 |
| C | -1.1829654 | 1.0132102  | 1.1330326  |
| C | -2.8494735 | -0.9300624 | -2.0905742 |
| O | -4.9488251 | 0.6482971  | 0.6797746  |
| O | -1.9620218 | 2.7881343  | -2.1312576 |
| O | -0.7020880 | 1.5626840  | 2.0324857  |
| O | -3.3345261 | -1.4622556 | -2.9971989 |
| C | 1.5933689  | -0.1129593 | -0.1335118 |
| C | 2.2704529  | 1.1129780  | -0.1250583 |
| C | 1.8643097  | -1.0494773 | 0.8720791  |
| C | 3.2019557  | 1.4000267  | 0.8746064  |
| H | 2.0676409  | 1.8460287  | -0.9032919 |
| C | 2.7893927  | -0.7609628 | 1.8739778  |
| H | 1.3518392  | -2.0088927 | 0.8488561  |

|   |           |            |            |
|---|-----------|------------|------------|
| C | 3.4617098 | 0.4651993  | 1.8785810  |
| H | 3.7259070 | 2.3525379  | 0.8672503  |
| H | 2.9909168 | -1.4940465 | 2.6510711  |
| H | 4.1868264 | 0.6874954  | 2.6569123  |
| P | 0.4453730 | -2.4218822 | -2.2042855 |
| H | 1.8294157 | -2.3012308 | -2.5519811 |

**4dh<sup>•</sup>** : [W(CO)<sub>5</sub>]PPhPh<sup>•</sup> anion complex  
26

Energy = -1550.056632392

|   |            |            |            |
|---|------------|------------|------------|
| P | 0.4126580  | -0.2280381 | -1.2713121 |
| H | 0.8332430  | 0.6650829  | -2.2788483 |
| C | -1.8747089 | -1.8974311 | 0.4638773  |
| W | -2.0066982 | -0.0857095 | -0.5145894 |
| O | -1.8181058 | -2.9045448 | 1.0280639  |
| C | -3.9154403 | 0.1371040  | 0.1178751  |
| C | -2.0965571 | 1.7210506  | -1.5020343 |
| C | -1.3511925 | 0.8743872  | 1.1906448  |
| C | -2.6821341 | -1.0277165 | -2.2207693 |
| O | -5.0066570 | 0.2812465  | 0.4830150  |
| O | -2.1317550 | 2.7312460  | -2.0605830 |
| O | -0.9967634 | 1.4163446  | 2.1458990  |
| O | -3.0881694 | -1.5436763 | -3.1715172 |
| C | 1.6999287  | 0.0398024  | -0.0192631 |
| C | 2.6672892  | 1.0375804  | -0.1940558 |
| C | 1.7023060  | -0.7371419 | 1.1478017  |
| C | 3.6266856  | 1.2570931  | 0.7952924  |
| H | 2.6715399  | 1.6415289  | -1.0973115 |
| C | 2.6700990  | -0.5224424 | 2.1260458  |
| H | 0.9502776  | -1.5086294 | 1.2925412  |
| C | 3.6305776  | 0.4776705  | 1.9529902  |
| H | 4.3713005  | 2.0356997  | 0.6581349  |
| H | 2.6711230  | -1.1307739 | 3.0255173  |
| H | 4.3792319  | 0.6492794  | 2.7207360  |
| P | 0.7908397  | -2.2249196 | -2.0708529 |
| H | 0.0015331  | -1.9389334 | -3.2206120 |

**4dp<sub>ts</sub>** : P/P 1,2-H-shift of [W(CO)<sub>5</sub>]PPhPMe<sup>•</sup>  
29

Energy = -1589.362444366

|   |            |            |            |
|---|------------|------------|------------|
| P | 1.1513769  | -0.7734830 | -0.1927283 |
| H | 1.6022371  | -2.0606696 | -1.0977303 |
| C | -1.9252224 | -1.7965220 | 0.1777953  |
| W | -1.1793433 | 0.1136646  | -0.0506170 |
| O | -2.3521888 | -2.8614376 | 0.3087042  |
| C | -3.0317623 | 0.8987350  | 0.1597930  |
| C | -0.3968871 | 2.0041088  | -0.2988572 |
| C | -0.8960139 | 0.2382743  | 1.9884407  |
| C | -1.4439060 | -0.0333705 | -2.0962497 |
| O | -4.0899116 | 1.3554781  | 0.2945790  |
| O | 0.0436462  | 3.0618544  | -0.4415068 |

|   |            |            |            |
|---|------------|------------|------------|
| O | -0.7317465 | 0.3031977  | 3.1300718  |
| O | -1.5985104 | -0.1124467 | -3.2372039 |
| C | 2.6245057  | 0.2789051  | -0.1086091 |
| C | 2.8191899  | 1.0840979  | 1.0248716  |
| C | 3.5510661  | 0.3252145  | -1.1612695 |
| C | 3.9302976  | 1.9219326  | 1.1026649  |
| H | 2.1041240  | 1.0557442  | 1.8423990  |
| C | 4.6626030  | 1.1626157  | -1.0745570 |
| H | 3.3974639  | -0.2850799 | -2.0466572 |
| C | 4.8533929  | 1.9609045  | 0.0552350  |
| H | 4.0749491  | 2.5429088  | 1.9818100  |
| H | 5.3754138  | 1.1956480  | -1.8933194 |
| H | 5.7178247  | 2.6152598  | 0.1179446  |
| P | 1.7180798  | -2.8387011 | 0.3669753  |
| C | 3.5455414  | -2.6640270 | 0.6410594  |
| H | 3.9287382  | -3.6690191 | 0.8428264  |
| H | 4.0603057  | -2.2572136 | -0.2322428 |
| H | 3.7433031  | -2.0216938 | 1.5041257  |

**4dp<sup>•</sup>** : [W(CO)<sub>5</sub>]PPhPHMe<sup>•</sup> radical complex  
29

Energy = -1589.409126648

|   |            |            |            |
|---|------------|------------|------------|
| P | 0.3287732  | 1.2455268  | 0.3834865  |
| P | -1.2661857 | 2.0736900  | -0.8470267 |
| C | 1.3803276  | 2.6312965  | 0.8339279  |
| C | 2.4578981  | 2.3912779  | 1.7120551  |
| C | 1.1573713  | 3.9467143  | 0.3800974  |
| C | 3.2844219  | 3.4324100  | 2.1196987  |
| H | 2.6400757  | 1.3826680  | 2.0724366  |
| C | 1.9910569  | 4.9837241  | 0.7874807  |
| H | 0.3497463  | 4.1534803  | -0.3171039 |
| C | 3.0544984  | 4.7327749  | 1.6597001  |
| H | 4.1102307  | 3.2312746  | 2.7957300  |
| H | 1.8145955  | 5.9899947  | 0.4187929  |
| H | 3.7023513  | 5.5448162  | 1.9758485  |
| W | 1.2135858  | -1.0502333 | -0.0318518 |
| C | 3.0862994  | -0.2379197 | -0.3337895 |
| C | 0.7631996  | -0.7870892 | -2.0315458 |
| C | 1.6636686  | -1.3320733 | 1.9658685  |
| C | -0.6843435 | -1.8026773 | 0.2609903  |
| C | 1.9363428  | -2.8967136 | -0.4610688 |
| O | 4.1311636  | 0.2187622  | -0.5102535 |
| O | 0.5114224  | -0.6466489 | -3.1487293 |
| O | 1.9205034  | -1.5053693 | 3.0780085  |
| O | -1.7504455 | -2.2185862 | 0.4164895  |
| O | 2.3574194  | -3.9459408 | -0.7186493 |
| C | -2.3986436 | 2.8705281  | 0.3990017  |
| H | -2.6286297 | 2.2088051  | 1.2355742  |
| H | -1.9256757 | 3.7823855  | 0.7716007  |
| H | -3.3200893 | 3.1454773  | -0.1234735 |
| H | -1.9073552 | 0.8166656  | -0.9629496 |

**4dT** : [W(CO)<sub>5</sub>]PPhPhMeT complex  
57

Energy = -1998.260393963

|   |            |            |            |
|---|------------|------------|------------|
| P | 0.1564616  | 0.9785957  | 0.9150135  |
| P | -1.6760964 | 1.9491419  | 0.0794071  |
| C | 1.2287742  | 2.4550447  | 0.9154015  |
| H | -0.0169559 | 0.8654141  | 2.3140580  |
| N | -2.8795454 | 0.7670270  | -0.1395977 |
| C | 1.7779276  | 2.9331567  | 2.1130002  |
| C | 1.5348970  | 3.1029732  | -0.2906712 |
| C | -3.5023957 | 0.8381042  | -1.5294434 |
| C | -3.6284162 | 0.0944498  | 0.9851176  |
| C | 2.6283935  | 4.0388884  | 2.1034897  |
| H | 1.5430622  | 2.4392607  | 3.0520736  |
| C | 2.3794846  | 4.2113683  | -0.2948071 |
| H | 1.1082796  | 2.7455499  | -1.2229018 |
| C | -4.2399711 | -0.4725909 | -1.8654714 |
| C | -2.4019198 | 0.9846985  | -2.5967733 |
| C | -4.4544455 | 2.0429735  | -1.6409110 |
| C | -4.3120588 | -1.1934997 | 0.4840744  |
| C | -4.6983860 | 1.0067235  | 1.6221138  |
| C | -2.6288377 | -0.3354831 | 2.0652095  |
| C | 2.9303246  | 4.6797260  | 0.9006164  |
| H | 3.0527853  | 4.3992654  | 3.0362370  |
| H | 2.6099377  | 4.7086499  | -1.2323593 |
| C | -5.1590613 | -0.9734415 | -0.7613814 |
| H | -3.4910882 | -1.2458432 | -2.0730055 |
| H | -4.7926998 | -0.2988190 | -2.7959719 |
| H | -1.9377527 | 1.9727273  | -2.5898927 |
| H | -1.6240012 | 0.2309726  | -2.4456727 |
| H | -2.8552156 | 0.8235081  | -3.5813761 |
| H | -4.8122780 | 2.1442676  | -2.6718076 |
| H | -3.9216868 | 2.9629099  | -1.3726106 |
| H | -5.3241665 | 1.9450278  | -0.9870261 |
| H | -3.5397933 | -1.9386334 | 0.2604550  |
| H | -4.9141826 | -1.5845082 | 1.3126148  |
| H | -5.5073648 | 1.2326754  | 0.9244253  |
| H | -5.1352606 | 0.4957603  | 2.4875274  |
| H | -4.2721279 | 1.9497884  | 1.9646856  |
| H | -1.8180703 | -0.9224959 | 1.6206685  |
| H | -2.2028564 | 0.5115687  | 2.6071275  |
| H | -3.1446970 | -0.9653782 | 2.7969097  |
| H | 3.5921047  | 5.5409616  | 0.8938692  |
| H | -5.6355362 | -1.9121164 | -1.0662858 |
| H | -5.9672185 | -0.2578528 | -0.5661532 |
| W | 1.2275156  | -1.0536820 | -0.1788851 |
| C | 3.0366841  | -0.2231265 | 0.3601625  |
| C | 1.2947564  | -0.0493399 | -1.9740762 |
| C | 1.0798149  | -1.9782814 | 1.6540530  |
| C | -0.5137019 | -1.9779191 | -0.7690922 |

|   |            |            |            |
|---|------------|------------|------------|
| C | 2.2286478  | -2.6232414 | -0.9586603 |
| O | 4.0619469  | 0.2235338  | 0.6495059  |
| O | 1.3355584  | 0.5079961  | -2.9873184 |
| O | 0.9769564  | -2.4774914 | 2.6922105  |
| O | -1.4308731 | -2.5836173 | -1.1312453 |
| O | 2.8152832  | -3.5245667 | -1.3985233 |
| C | -2.0505861 | 3.0392631  | 1.5346536  |
| H | -2.2023301 | 2.5309088  | 2.4896791  |
| H | -1.1901580 | 3.7108523  | 1.6263555  |
| H | -2.9310932 | 3.6441546  | 1.2975567  |

**4d<sup>-</sup>** : [W(CO)<sub>5</sub>]PPhPMe<sup>-</sup> anion complex  
29

Energy = -1589.535081523

|   |            |            |            |
|---|------------|------------|------------|
| P | 0.4902864  | -0.3996713 | -1.3898875 |
| H | 0.7997841  | 0.6792446  | -2.2693481 |
| C | -2.0409046 | -1.9014379 | 0.1370519  |
| W | -1.9221246 | 0.0474074  | -0.5178761 |
| O | -2.0960426 | -2.9879247 | 0.5351279  |
| C | -3.7674812 | 0.4690647  | 0.1494040  |
| C | -1.6194032 | 1.9697198  | -1.1622265 |
| C | -1.1183845 | 0.5676168  | 1.3025207  |
| C | -2.6770570 | -0.4426037 | -2.3678657 |
| O | -4.8415226 | 0.7266446  | 0.5302527  |
| O | -1.4096810 | 3.0509968  | -1.5264481 |
| O | -0.6828690 | 0.8744434  | 2.3312094  |
| O | -3.1239200 | -0.6846234 | -3.4106373 |
| C | 1.7146820  | 0.0576341  | -0.1029829 |
| C | 2.2603758  | 1.3474966  | -0.0618324 |
| C | 2.0566680  | -0.8596529 | 0.8991993  |
| C | 3.1293331  | 1.7159003  | 0.9663189  |
| H | 2.0024695  | 2.0655282  | -0.8371723 |
| C | 2.9245387  | -0.4912748 | 1.9264359  |
| H | 1.6409305  | -1.8635084 | 0.8535572  |
| C | 3.4628907  | 0.7978178  | 1.9644479  |
| H | 3.5487269  | 2.7186211  | 0.9852189  |
| H | 3.1818451  | -1.2111015 | 2.6993297  |
| H | 4.1401741  | 1.0839034  | 2.7647880  |
| P | 1.1586738  | -2.2903326 | -2.1232434 |
| C | -0.4345353 | -2.9345615 | -2.8956683 |
| H | -0.2819199 | -4.0047004 | -3.0807154 |
| H | -1.2897115 | -2.8287350 | -2.2197837 |
| H | -0.6863570 | -2.4602521 | -3.8499236 |

**4d<sup>•</sup>** : [W(CO)<sub>5</sub>]PPhPMe<sup>•</sup> radical complex  
29

Energy = -1589.405695218

|   |            |            |            |
|---|------------|------------|------------|
| P | 1.1154962  | 0.7102689  | 0.8023678  |
| H | 1.2824375  | 0.7776343  | 2.2003908  |
| C | -0.6363283 | -0.1661240 | -1.9406767 |
| W | -1.1386867 | -0.2003843 | 0.0534488  |

|   |            |            |            |
|---|------------|------------|------------|
| O | -0.3895355 | -0.1552983 | -3.0717465 |
| C | -2.9326831 | -0.9970448 | -0.4277804 |
| C | -1.6577925 | -0.2108121 | 2.0486610  |
| C | -0.3536147 | -2.0986948 | 0.2346343  |
| C | -1.9221981 | 1.6987637  | -0.1368945 |
| O | -3.9595085 | -1.4672698 | -0.6933446 |
| O | -1.9458275 | -0.2109195 | 3.1670857  |
| O | 0.0775200  | -3.1657580 | 0.3315516  |
| O | -2.3848593 | 2.7507994  | -0.2568214 |
| C | 2.6500027  | -0.1574252 | 0.3394004  |
| C | 3.7857093  | -0.0628178 | 1.1591953  |
| C | 2.7189240  | -0.8776822 | -0.8595413 |
| C | 4.9701130  | -0.6930489 | 0.7832737  |
| H | 3.7399975  | 0.4971664  | 2.0892308  |
| C | 3.9100878  | -1.4971679 | -1.2375602 |
| H | 1.8396785  | -0.9646196 | -1.4897307 |
| C | 5.0351216  | -1.4070717 | -0.4165429 |
| H | 5.8427465  | -0.6260870 | 1.4263808  |
| H | 3.9555066  | -2.0551518 | -2.1679728 |
| H | 5.9602906  | -1.8956144 | -0.7076857 |
| P | 1.5170276  | 2.8230436  | 0.3307230  |
| C | 1.6546576  | 2.6402889  | -1.5059277 |
| H | 2.3880585  | 1.8750242  | -1.7825264 |
| H | 0.6849491  | 2.3704237  | -1.9380935 |
| H | 1.9665578  | 3.6025730  | -1.9202641 |

Ar<sub>3</sub>N : (*p*-BrC<sub>6</sub>H<sub>4</sub>)<sub>3</sub>N amine  
34

Energy = -8470.563310441

|   |            |            |            |
|---|------------|------------|------------|
| N | -0.0004318 | -0.0008500 | 0.0008093  |
| C | -0.0002127 | 1.4158389  | -0.0014067 |
| C | -0.8307674 | 2.1240386  | -0.8822483 |
| C | 0.8311160  | 2.1265998  | 0.8766322  |
| C | -0.8387814 | 3.5160000  | -0.8829287 |
| H | -1.4721863 | 1.5841512  | -1.5711329 |
| C | 0.8415707  | 3.5185403  | 0.8709367  |
| H | 1.4715575  | 1.5887432  | 1.5680111  |
| C | 0.0022665  | 4.2011806  | -0.0078228 |
| H | -1.4807201 | 4.0562483  | -1.5699131 |
| H | 1.4839671  | 4.0608112  | 1.5558949  |
| C | -1.2158386 | -0.7091369 | -0.1671789 |
| C | -1.2534084 | -1.8816847 | -0.9358779 |
| C | -2.3957785 | -0.2453505 | 0.4326384  |
| C | -2.4440701 | -2.5844196 | -1.0974476 |
| H | -0.3481698 | -2.2447456 | -1.4113603 |
| C | -3.5940324 | -0.9329381 | 0.2625926  |
| H | -2.3764450 | 0.6565792  | 1.0356270  |
| C | -3.6058576 | -2.1003367 | -0.4987086 |
| H | -2.4660654 | -3.4872320 | -1.6977478 |
| H | -4.5012975 | -0.5699007 | 0.7326205  |
| C | 1.2148767  | -0.7089906 | 0.1700890  |

|    |            |            |            |
|----|------------|------------|------------|
| C  | 2.3947584  | -0.2466581 | -0.4309663 |
| C  | 1.2523951  | -1.8800006 | 0.9411236  |
| C  | 3.5930017  | -0.9338925 | -0.2594692 |
| H  | 2.3753180  | 0.6536519  | -1.0363637 |
| C  | 2.4430074  | -2.5825211 | 1.1040103  |
| H  | 0.3470822  | -2.2422553 | 1.4170741  |
| C  | 3.6049047  | -2.0994462 | 0.5046620  |
| H  | 4.5001035  | -0.5723033 | -0.7309283 |
| H  | 2.4647440  | -3.4847124 | 1.7052494  |
| Br | 0.0047439  | 6.1152452  | -0.0129883 |
| Br | -5.2483326 | -3.0564966 | -0.7261279 |
| Br | 5.2476881  | -3.0543198 | 0.7353014  |

Ar<sub>3</sub>N<sup>•+</sup> : (*p*-BrC<sub>6</sub>H<sub>4</sub>)<sub>3</sub>N<sup>•+</sup> radical cation

34

Energy = -8470.367610204

|    |            |            |            |
|----|------------|------------|------------|
| N  | -0.0001621 | -0.0008143 | 0.0003797  |
| C  | 0.0001150  | 1.4084813  | -0.0019346 |
| C  | -0.8647173 | 2.1063800  | -0.8653081 |
| C  | 0.8654776  | 2.1088663  | 0.8588864  |
| C  | -0.8623640 | 3.4916769  | -0.8704046 |
| H  | -1.5048215 | 1.5617028  | -1.5505505 |
| C  | 0.8642871  | 3.4941800  | 0.8588237  |
| H  | 1.5054243  | 1.5662038  | 1.5458775  |
| C  | 0.0013704  | 4.1765904  | -0.0071882 |
| H  | -1.5094124 | 4.0361551  | -1.5479944 |
| H  | 1.5115878  | 4.0406429  | 1.5345726  |
| C  | -1.2092920 | -0.7055224 | -0.1663928 |
| C  | -1.2257248 | -1.8993072 | -0.9112581 |
| C  | -2.3925552 | -0.2101141 | 0.4120995  |
| C  | -2.4149359 | -2.5896148 | -1.0795947 |
| H  | -0.3177504 | -2.2582908 | -1.3830823 |
| C  | -3.5810280 | -0.9031031 | 0.2498061  |
| H  | -2.3675257 | 0.6922354  | 1.0130364  |
| C  | -3.5847226 | -2.0874406 | -0.4968333 |
| H  | -2.4401598 | -3.4974194 | -1.6708163 |
| H  | -4.4918989 | -0.5402091 | 0.7111582  |
| C  | 1.2087876  | -0.7053926 | 0.1690054  |
| C  | 2.3920795  | -0.2119947 | -0.4111363 |
| C  | 1.2249834  | -1.8971377 | 0.9171373  |
| C  | 3.5803219  | -0.9050287 | -0.2473561 |
| H  | 2.3672196  | 0.6887116  | -1.0145389 |
| C  | 2.4139596  | -2.5875162 | 1.0868925  |
| H  | 0.3170074  | -2.2544726 | 1.3902127  |
| C  | 3.5837590  | -2.0874101 | 0.5023711  |
| H  | 4.4912038  | -0.5437131 | -0.7099229 |
| H  | 2.4389995  | -3.4937663 | 1.6805049  |
| Br | 0.0025163  | 6.0677656  | -0.0110738 |
| Br | -5.2080418 | -3.0308585 | -0.7235950 |
| Br | 5.2067185  | -3.0310284 | 0.7308722  |

NO<sup>•</sup> : NO<sup>•</sup> radical

2

Energy = -129.9680916564

|   |           |           |           |
|---|-----------|-----------|-----------|
| N | 0.0219978 | 0.0000000 | 0.0000000 |
| O | 1.1780022 | 0.0000000 | 0.0000000 |

NO<sup>+</sup> : cation

2

Energy = -129.7291079400

|   |           |           |           |
|---|-----------|-----------|-----------|
| N | 0.0681067 | 0.0000000 | 0.0000000 |
| O | 1.1318933 | 0.0000000 | 0.0000000 |

Ph<sub>3</sub>C<sup>•</sup> : trityl radical

34

Energy = -733.4910215845

|   |            |            |            |
|---|------------|------------|------------|
| C | -0.0000313 | 0.0008206  | -0.0000345 |
| C | -0.0000715 | 1.4581175  | -0.0022430 |
| C | -0.9216257 | 2.1913181  | -0.7866825 |
| C | 0.9215357  | 2.1938009  | 0.7798059  |
| C | -0.9170347 | 3.5817766  | -0.7913036 |
| H | -1.6263198 | 1.6525736  | -1.4129156 |
| C | 0.9179157  | 3.5842732  | 0.7788616  |
| H | 1.6252695  | 1.6570982  | 1.4088651  |
| C | 0.0006893  | 4.2892660  | -0.0076339 |
| H | -1.6264447 | 4.1187712  | -1.4153035 |
| H | 1.6279014  | 4.1232598  | 1.4004854  |
| H | 0.0010776  | 5.3755130  | -0.0097962 |
| C | -1.2504290 | -0.7285598 | -0.1703508 |
| C | -1.2871267 | -1.9767775 | -0.8354601 |
| C | -2.4731998 | -0.2154313 | 0.3228533  |
| C | -2.4813195 | -2.6695937 | -1.0008229 |
| H | -0.3668325 | -2.3837707 | -1.2433885 |
| C | -3.6642130 | -0.9150261 | 0.1631487  |
| H | -2.4708874 | 0.7303630  | 0.8562242  |
| C | -3.6783638 | -2.1460624 | -0.5010234 |
| H | -2.4822810 | -3.6191133 | -1.5294421 |
| H | -4.5862708 | -0.5039164 | 0.5653565  |
| H | -4.6098508 | -2.6904598 | -0.6270893 |
| C | 1.2503123  | -0.7281562 | 0.1723600  |
| C | 2.4731334  | -0.2165498 | -0.3222995 |
| C | 1.2868648  | -1.9745502 | 0.8408716  |
| C | 3.6641301  | -0.9156369 | -0.1602680 |
| H | 2.4708252  | 0.7274357  | -0.8588600 |
| C | 2.4809967  | -2.6669346 | 1.0083785  |
| H | 0.3664904  | -2.3803461 | 1.2497979  |
| C | 3.6782369  | -2.1445005 | 0.5079126  |
| H | 4.5861589  | -0.5060017 | -0.5640432 |
| H | 2.4817608  | -3.6152275 | 1.5391903  |
| H | 4.6099368  | -2.6878112 | 0.6370614  |

Ph<sub>3</sub>C<sup>+</sup> : trityl carbocation

34

Energy = -733.3236523814

|   |            |            |            |
|---|------------|------------|------------|
| C | 0.0004352  | 0.0002639  | -0.0001375 |
| C | 0.0005369  | 1.4432770  | -0.0025635 |
| C | -0.9298040 | 2.1621420  | -0.7946745 |
| C | 0.9308437  | 2.1647831  | 0.7872311  |
| C | -0.9165434 | 3.5482431  | -0.8037333 |
| H | -1.6122595 | 1.6175585  | -1.4382137 |
| C | 0.9170705  | 3.5508751  | 0.7922927  |
| H | 1.6136336  | 1.6223209  | 1.4322125  |
| C | 0.0002425  | 4.2439890  | -0.0068668 |
| H | -1.6107850 | 4.0922903  | -1.4355487 |
| H | 1.6109514  | 4.0970410  | 1.4226791  |
| H | 0.0002218  | 5.3296866  | -0.0085940 |
| C | -1.2376229 | -0.7212686 | -0.1711405 |
| C | -1.2552046 | -1.9731986 | -0.8359093 |
| C | -2.4553994 | -0.1894672 | 0.3225307  |
| C | -2.4492057 | -2.6553521 | -1.0105354 |
| H | -0.3355968 | -2.3634137 | -1.2583966 |
| C | -3.6394440 | -0.8934187 | 0.1676926  |
| H | -2.4424324 | 0.7444852  | 0.8739408  |
| C | -3.6399631 | -2.1216913 | -0.5037533 |
| H | -2.4608222 | -3.5979266 | -1.5477502 |
| H | -4.5630131 | -0.4958842 | 0.5752660  |
| H | -4.5711644 | -2.6649116 | -0.6321985 |
| C | 1.2378980  | -0.7215677 | 0.1730606  |
| C | 2.4561180  | -0.1920765 | -0.3220682 |
| C | 1.2545243  | -1.9715955 | 0.8414229  |
| C | 3.6396168  | -0.8964558 | -0.1651139 |
| H | 2.4438791  | 0.7400960  | -0.8764863 |
| C | 2.4479566  | -2.6542733 | 1.0178508  |
| H | 0.3346559  | -2.3597125 | 1.2652460  |
| C | 3.6391842  | -2.1227589 | 0.5099423  |
| H | 4.5635280  | -0.5007808 | -0.5737206 |
| H | 2.4587911  | -3.5954300 | 1.5575525  |
| H | 4.5701062  | -2.6659061 | 0.6406973  |

TOH : TEMP-OH

30

Energy = -484.6280094845

|   |            |            |            |
|---|------------|------------|------------|
| O | 0.0029487  | -2.0724761 | 0.0780636  |
| C | -1.2871126 | -0.0717481 | -0.0500409 |
| C | 1.2896709  | -0.0695833 | -0.0496051 |
| C | -1.2454340 | 1.3819080  | -0.5608577 |
| C | 1.2458211  | 1.3839830  | -0.5605105 |
| C | -0.0005209 | 2.1369712  | -0.0973463 |
| H | -2.1621489 | 1.8840906  | -0.2291416 |
| H | -1.2617950 | 1.3617463  | -1.6586138 |
| H | 2.1616436  | 1.8875671  | -0.2284723 |
| H | 1.2624799  | 1.3640506  | -1.6582854 |
| H | -0.0012578 | 3.1522926  | -0.5108741 |

|   |            |            |            |
|---|------------|------------|------------|
| H | -0.0008338 | 2.2440684  | 0.9943753  |
| N | 0.0018575  | -0.7049147 | -0.4586952 |
| C | -1.5995267 | -0.1232244 | 1.4597729  |
| H | -2.6576042 | 0.1149050  | 1.6155111  |
| H | -1.4128220 | -1.1275650 | 1.8487267  |
| H | -1.0090234 | 0.5915140  | 2.0362569  |
| C | -2.3961790 | -0.8238533 | -0.8022877 |
| H | -2.1627676 | -0.8628391 | -1.8712697 |
| H | -2.5005789 | -1.8453313 | -0.4252373 |
| H | -3.3525304 | -0.3068282 | -0.6673268 |
| C | 1.6020094  | -0.1202497 | 1.4602671  |
| H | 2.6597462  | 0.1195454  | 1.6158178  |
| H | 1.0105117  | 0.5938670  | 2.0364999  |
| H | 1.4168830  | -1.1247431 | 1.8495410  |
| C | 2.4000196  | -0.8202644 | -0.8013091 |
| H | 2.5077490  | -1.8405686 | -0.4220231 |
| H | 2.1650894  | -0.8625909 | -1.8697732 |
| H | 3.3551214  | -0.3002852 | -0.6688804 |
| H | 0.0045799  | -2.6080002 | -0.7314997 |

TO<sup>-</sup> : TEMPO<sup>-</sup> anion

29

Energy = -484.0919742077

|   |            |            |            |
|---|------------|------------|------------|
| O | 0.0012594  | -2.0699897 | 0.1511810  |
| C | -1.2704896 | -0.0687689 | -0.0339116 |
| C | 1.2706908  | -0.0674813 | -0.0345073 |
| C | -1.2429607 | 1.3707976  | -0.5753273 |
| C | 1.2423369  | 1.3734475  | -0.5734807 |
| C | -0.0016067 | 2.1402910  | -0.1261834 |
| H | -2.1630208 | 1.8870135  | -0.2671828 |
| H | -1.2468502 | 1.3221098  | -1.6738944 |
| H | 2.1608195  | 1.8902754  | -0.2618025 |
| H | 1.2493054  | 1.3276748  | -1.6723717 |
| H | -0.0021751 | 3.1535811  | -0.5500226 |
| H | -0.0026941 | 2.2571597  | 0.9656806  |
| N | 0.0002349  | -0.7643059 | -0.4121295 |
| C | -1.5708584 | -0.1034696 | 1.4807944  |
| H | -2.6473390 | -0.0080386 | 1.6720698  |
| H | -1.2199909 | -1.0790228 | 1.8395600  |
| H | -1.0578488 | 0.6917987  | 2.0300209  |
| C | -2.3800448 | -0.8458829 | -0.7588370 |
| H | -2.1990557 | -0.8201751 | -1.8398082 |
| H | -2.3494037 | -1.8872647 | -0.4270446 |
| H | -3.3666425 | -0.4131989 | -0.5470205 |
| C | 1.5721762  | -0.1019573 | 1.4801171  |
| H | 2.6487624  | -0.0051277 | 1.6702334  |
| H | 1.0588956  | 0.6931375  | 2.0293784  |
| H | 1.2226740  | -1.0777085 | 1.8395354  |
| C | 2.3800009  | -0.8441027 | -0.7596248 |
| H | 2.3497456  | -1.8853870 | -0.4275563 |
| H | 2.1973758  | -0.8190896 | -1.8399559 |

H 3.3667115 -0.4111443 -0.5490082

TO• : TEMPO• radical

29

Energy = -484.0199119877

O -0.0000187 -2.0361975 0.0574260  
C -1.3291976 -0.0714412 0.0006091  
C 1.3292100 -0.0714144 0.0005786  
C -1.2411880 1.3616711 -0.5498131  
C 1.2410581 1.3615027 -0.5502511  
C 0.0000793 2.1127316 -0.0735264  
H -2.1594067 1.8854539 -0.2603649  
H -1.2270215 1.3164314 -1.6468545  
H 2.1594986 1.8853130 -0.2615724  
H 1.2262571 1.3158857 -1.6472692  
H 0.0000224 3.1298091 -0.4805849  
H 0.0003203 2.2101640 1.0190137  
N 0.0000284 -0.7626786 -0.1463354  
C -1.7345874 -0.0808549 1.4872560  
H -2.7696298 0.2637886 1.5820791  
H -1.6643951 -1.0988031 1.8806371  
H -1.0993534 0.5742849 2.0890289  
C -2.3519721 -0.8736140 -0.8135684  
H -2.0421442 -0.9365897 -1.8616079  
H -2.4600187 -1.8846952 -0.4160335  
H -3.3204807 -0.3653174 -0.7646838  
C 1.7345211 -0.0804133 1.4872681  
H 2.7694008 0.2646973 1.5821406  
H 1.0990044 0.5745623 2.0889256  
H 1.6647012 -1.0983037 1.8808572  
C 2.3521247 -0.8737272 -0.8132630  
H 2.4599471 -1.8848063 -0.4156861  
H 2.0425751 -0.9367328 -1.8613829  
H 3.3206735 -0.3655354 -0.7641205

TO<sup>+</sup> : TEMPO<sup>+</sup> cation

29

Energy = -483.8301363958

O -0.0001829 -1.8491069 -0.7574866  
C -1.3441694 -0.0795407 -0.0083877  
C 1.3442110 -0.0799357 -0.0084567  
C -1.2487656 1.3660811 -0.5654675  
C 1.2491925 1.3655258 -0.5658815  
C 0.0004365 2.1115498 -0.1125730  
H -2.1622914 1.8709001 -0.2368238  
H -1.2768516 1.3109680 -1.6593431  
H 2.1631053 1.8701308 -0.2380376  
H 1.2763486 1.3099999 -1.6597054  
H 0.0006933 3.1101194 -0.5609394  
H 0.0005960 2.2592488 0.9722616

N -0.0000406 -0.7516295 -0.2720003

C -1.5982109 -0.0919982 1.5190458  
H -2.6522442 0.1688278 1.6441171  
H -1.4350665 -1.0873954 1.9377649  
H -0.9962314 0.6391693 2.0544531  
C -2.4172132 -0.8909128 -0.7228766  
H -2.1961528 -0.9934037 -1.7881988  
H -2.5343252 -1.8845960 -0.2848567  
H -3.3584512 -0.3473527 -0.6095510  
C 1.5978221 -0.0920833 1.5192168  
H 2.6519895 0.1681100 1.6444467  
H 0.9961205 0.6396844 2.0541266  
H 1.4338876 -1.0872252 1.9381963  
C 2.4171413 -0.8917570 -0.7225674  
H 2.5338157 -1.8854711 -0.2845149  
H 2.1962954 -0.9942030 -1.7879945  
H 3.3585499 -0.3485331 -0.6090642

T• : TEMP• radical

28

Energy = -408.7570084419

C -1.2675407 -0.0685821 -0.0160759  
C 1.2678109 -0.0686132 -0.0167972  
C -1.2408437 1.3855892 -0.5416563  
C 1.2396525 1.3829818 -0.5484785  
C 0.0014761 2.1454697 -0.0814705  
H -2.1609326 1.8906563 -0.2237354  
H -1.2515658 1.3587324 -1.6399609  
H 2.1627862 1.8881701 -0.2397540  
H 1.2416785 1.3512044 -1.6467013  
H 0.0011603 3.1594789 -0.4974092  
H 0.0047256 2.2538783 1.0106722  
N 0.0001330 -0.7904117 -0.1338767  
C -1.6842592 -0.0882690 1.4789501  
H -2.7295019 0.2306658 1.5574230  
H -1.5929270 -1.1001169 1.8844821  
H -1.0701695 0.5856608 2.0807817  
C -2.3014329 -0.8854379 -0.8114099  
H -2.0108782 -0.9394904 -1.8657644  
H -2.3662686 -1.9043493 -0.4162277  
H -3.2897005 -0.4158183 -0.7454093  
C 1.6829837 -0.0815788 1.4786960  
H 2.7279229 0.2384499 1.5569612  
H 1.0678599 0.5944170 2.0770001  
H 1.5919654 -1.0917078 1.8885155  
C 2.3030368 -0.8884053 -0.8069909  
H 2.3681699 -1.9052730 -0.4066255  
H 2.0137978 -0.9481438 -1.8614572  
H 3.2908883 -0.4177887 -0.7422052
